# Supplementary material for: Integrative Genome-Wide Analysis of Long Noncoding RNAs in Diverse Immune Cell Types of Melanoma Patients
Source: Oxford University Press journal article supplement (doi:10.1158/0008-5472.can-18-0529), 2018-06-12
Supplement: 00085472can180529-sup-197297_2_supp_4797637_p9v9qx.xlsx [file 00085472can180529-sup-197297_2_supp_4797637_p9v9qx.xlsx]

## Sheet: Table S8_CD8_cor_lncRNA
lncRNA	PD1	cor	p-value	gene	transcript	class	gene	transcript
TCONS_00043676	PD1_201	-0.728646	6.70208e-08	PDCD4-AS1	ENST00000420367.1	=	PDCD4-AS1	TCONS_00043676
TCONS_00090950	PD1_201	-0.838791	0	-	-	u	XLOC_017150	TCONS_00090950
TCONS_00096804	PD1_201	-0.721739	9.11341e-08	RP11-61O1.2	ENST00000557072.1	=	RP11-61O1.2	TCONS_00096804
TCONS_00096805	PD1_201	-0.705211	1.84091e-07	RP11-61O1.2	ENST00000557072.1	j	RP11-61O1.2	TCONS_00096805
TCONS_00099963	PD1_201	0.728276	6.81604e-08	RP11-649E7.5	ENST00000555043.1	=	RP11-649E7.5	TCONS_00099963
TCONS_00140586	PD1_201	-0.702621	2.05317e-07	RP11-449J21.5	ENST00000590137.1	j	RP11-449J21.5	TCONS_00140586
TCONS_00180916	PD1_201	-0.763155	7.00159e-10	-	-	u	XLOC_031794	TCONS_00180916
TCONS_00251086	PD1_201	-0.711378	1.41943e-07	LEF1-AS1	ENST00000436413.5	=	LEF1-AS1	TCONS_00251086
TCONS_00251088	PD1_201	-0.711502	1.41205e-07	LEF1-AS1	ENST00000508266.1	=	LEF1-AS1	TCONS_00251088
TCONS_00260792	PD1_201	-0.701511	2.15155e-07	RP11-260E18.1	ENST00000499131.1	=	RP11-260E18.1	TCONS_00260792
TCONS_00289271	PD1_201	-0.708295	1.61666e-07	-	-	u	XLOC_052794	TCONS_00289271

## Sheet: Table S8_CD4_blue
lncRNA	mRNA	correlation coefficient	p-value
TCONS_00009457	TCONS_00235822	0.709262	5.08321e-07
TCONS_00010160	TCONS_00103194	-0.783	2.75244e-08
TCONS_00010807	TCONS_00142128	-0.718175	3.64105e-07
TCONS_00019210	TCONS_00056998	0.700835	7.04692e-07
TCONS_00027524	TCONS_00190942	0.70521	5.93985e-07
TCONS_00027524	TCONS_00235180	-0.723847	2.96294e-07
TCONS_00029131	TCONS_00159563	-0.729549	4.2354e-08
TCONS_00029131	TCONS_00235169	0.729144	4.34594e-08
TCONS_00029131	TCONS_00235172	0.733034	3.38719e-08
TCONS_00029131	TCONS_00316454	0.703051	2.08628e-07
TCONS_00030024	TCONS_00035898	0.74135	1.60142e-07
TCONS_00030024	TCONS_00268999	-0.715258	4.05565e-07
TCONS_00037448	TCONS_00015094	0.749939	1.18414e-07
TCONS_00037448	TCONS_00213371	0.75237	1.08524e-07
TCONS_00037448	TCONS_00228215	0.722551	3.10462e-07
TCONS_00037448	TCONS_00257284	-0.700186	7.22926e-07
TCONS_00039580	TCONS_00239251	0.734868	2.00703e-07
TCONS_00057078	TCONS_00323992	0.708452	5.24298e-07
TCONS_00060714	TCONS_00189589	0.76809	5.88846e-08
TCONS_00061275	TCONS_00015094	0.799044	4.78483e-09
TCONS_00061275	TCONS_00023288	-0.834535	0
TCONS_00061275	TCONS_00037281	0.703752	6.28616e-07
TCONS_00061275	TCONS_00081623	-0.752046	1.09801e-07
TCONS_00061275	TCONS_00094523	-0.740702	1.63798e-07
TCONS_00061275	TCONS_00103196	0.823029	0
TCONS_00061275	TCONS_00133285	-0.712341	4.52344e-07
TCONS_00061275	TCONS_00139883	-0.748157	1.26153e-07
TCONS_00061275	TCONS_00172402	-0.706183	5.72064e-07
TCONS_00061275	TCONS_00182218	0.707803	5.3748e-07
TCONS_00061275	TCONS_00213371	0.808768	0
TCONS_00061275	TCONS_00218741	0.80585	0
TCONS_00061275	TCONS_00257284	-0.751236	1.13048e-07
TCONS_00061275	TCONS_00269111	0.72012	3.39089e-07
TCONS_00061275	TCONS_00272192	0.761284	7.77551e-08
TCONS_00061276	TCONS_00189576	-0.739729	1.69437e-07
TCONS_00075526	TCONS_00234229	-0.71461	4.15476e-07
TCONS_00078884	TCONS_00015094	0.799206	4.60136e-09
TCONS_00078884	TCONS_00034087	0.756584	9.2995e-08
TCONS_00078884	TCONS_00133285	-0.714286	4.20532e-07
TCONS_00078884	TCONS_00133302	-0.727737	2.5788e-07
TCONS_00078884	TCONS_00133304	0.773762	4.55373e-08
TCONS_00078884	TCONS_00133315	-0.703103	6.44712e-07
TCONS_00078884	TCONS_00147258	-0.70051	7.13746e-07
TCONS_00078884	TCONS_00208627	0.741512	1.5924e-07
TCONS_00078884	TCONS_00218741	0.803744	0
TCONS_00078884	TCONS_00243018	0.703428	6.36609e-07
TCONS_00078884	TCONS_00272192	0.747346	1.29817e-07
TCONS_00078884	TCONS_00303539	0.745564	1.38219e-07
TCONS_00084047	TCONS_00007692	0.710072	4.9288e-07
TCONS_00084047	TCONS_00040131	0.706993	5.54475e-07
TCONS_00084047	TCONS_00094523	-0.719148	3.5135e-07
TCONS_00084047	TCONS_00170548	-0.710882	4.77958e-07
TCONS_00084047	TCONS_00172402	-0.734705	2.01842e-07
TCONS_00084047	TCONS_00189577	0.713637	4.30851e-07
TCONS_00084047	TCONS_00213371	0.788186	1.91108e-08
TCONS_00084047	TCONS_00228215	0.753018	1.06007e-07
TCONS_00084047	TCONS_00235169	0.708938	5.14646e-07
TCONS_00084047	TCONS_00235170	0.70359	6.32598e-07
TCONS_00084047	TCONS_00235822	0.74605	1.3588e-07
TCONS_00084047	TCONS_00243018	0.770197	5.36983e-08
TCONS_00084047	TCONS_00272192	0.704076	6.20733e-07
TCONS_00084047	TCONS_00303539	0.726764	2.66945e-07
TCONS_00084048	TCONS_00023288	-0.718337	3.61944e-07
TCONS_00084048	TCONS_00040133	0.707479	5.44208e-07
TCONS_00084048	TCONS_00060553	-0.734543	2.02987e-07
TCONS_00084048	TCONS_00072673	0.715582	4.00709e-07
TCONS_00084048	TCONS_00081584	-0.742809	1.52202e-07
TCONS_00084048	TCONS_00094523	-0.727737	2.5788e-07
TCONS_00084048	TCONS_00133284	-0.739567	1.70395e-07
TCONS_00084048	TCONS_00133307	-0.712017	4.57901e-07
TCONS_00084048	TCONS_00133315	-0.769062	5.64557e-08
TCONS_00084048	TCONS_00213371	0.795803	8.63296e-09
TCONS_00084048	TCONS_00228215	0.748643	1.24e-07
TCONS_00084048	TCONS_00235159	0.721254	3.25381e-07
TCONS_00084048	TCONS_00235169	0.821246	0
TCONS_00084048	TCONS_00235170	0.825622	0
TCONS_00084048	TCONS_00235171	0.703752	6.28616e-07
TCONS_00084048	TCONS_00235196	-0.712827	4.44147e-07
TCONS_00084048	TCONS_00235215	-0.78851	1.86211e-08
TCONS_00084048	TCONS_00303539	0.744753	1.42201e-07
TCONS_00084048	TCONS_00303540	0.795965	8.43231e-09
TCONS_00084767	TCONS_00015094	0.723199	3.03287e-07
TCONS_00084767	TCONS_00119220	0.786241	2.21363e-08
TCONS_00084767	TCONS_00133304	0.730168	2.36646e-07
TCONS_00084767	TCONS_00142117	0.72644	2.70043e-07
TCONS_00084767	TCONS_00207508	-0.714448	4.17995e-07
TCONS_00084767	TCONS_00208627	0.74686	1.32061e-07
TCONS_00084767	TCONS_00208629	0.706993	5.54475e-07
TCONS_00084767	TCONS_00218741	0.761932	7.58052e-08
TCONS_00084767	TCONS_00235822	0.755773	9.58344e-08
TCONS_00084767	TCONS_00272192	0.751398	1.12392e-07
TCONS_00084767	TCONS_00303539	0.839559	0
TCONS_00098105	TCONS_00103196	0.714772	4.12973e-07
TCONS_00099963	TCONS_00007692	0.806823	0
TCONS_00099963	TCONS_00015094	0.879264	0
TCONS_00099963	TCONS_00023288	-0.762742	7.34159e-08
TCONS_00099963	TCONS_00043942	0.815574	0
TCONS_00099963	TCONS_00046163	0.730492	2.3396e-07
TCONS_00099963	TCONS_00060553	-0.738595	1.7626e-07
TCONS_00099963	TCONS_00072673	0.727089	2.63886e-07
TCONS_00099963	TCONS_00081605	0.819626	0
TCONS_00099963	TCONS_00084219	-0.720606	3.33138e-07
TCONS_00099963	TCONS_00094523	-0.76728	6.09564e-08
TCONS_00099963	TCONS_00103196	0.76728	6.09564e-08
TCONS_00099963	TCONS_00105903	0.75626	9.41228e-08
TCONS_00099963	TCONS_00119220	0.729195	2.44904e-07
TCONS_00099963	TCONS_00125352	-0.712503	4.49593e-07
TCONS_00099963	TCONS_00133285	-0.770197	5.36983e-08
TCONS_00099963	TCONS_00133302	-0.75707	9.13229e-08
TCONS_00099963	TCONS_00133304	0.801961	1.60799e-09
TCONS_00099963	TCONS_00133307	-0.720606	3.33138e-07
TCONS_00099963	TCONS_00133315	-0.782027	2.9229e-08
TCONS_00099963	TCONS_00133319	-0.705372	5.90268e-07
TCONS_00099963	TCONS_00142117	0.813467	0
TCONS_00099963	TCONS_00142128	-0.717527	3.72894e-07
TCONS_00099963	TCONS_00147258	-0.7877	1.98531e-08
TCONS_00099963	TCONS_00152077	0.794992	9.64954e-09
TCONS_00099963	TCONS_00168196	0.767442	6.05385e-08
TCONS_00099963	TCONS_00172402	-0.748157	1.26153e-07
TCONS_00099963	TCONS_00189576	-0.755449	9.69889e-08
TCONS_00099963	TCONS_00189589	0.712341	4.52344e-07
TCONS_00099963	TCONS_00192743	-0.781055	3.0976e-08
TCONS_00099963	TCONS_00195895	0.713637	4.30851e-07
TCONS_00099963	TCONS_00207508	-0.76728	6.09564e-08
TCONS_00099963	TCONS_00207509	-0.712503	4.49593e-07
TCONS_00099963	TCONS_00207511	-0.71072	4.80902e-07
TCONS_00099963	TCONS_00207513	-0.755125	9.81544e-08
TCONS_00099963	TCONS_00208627	0.820436	0
TCONS_00099963	TCONS_00208629	0.797423	6.66588e-09
TCONS_00099963	TCONS_00213371	0.856576	0
TCONS_00099963	TCONS_00218741	0.844745	0
TCONS_00099963	TCONS_00228215	0.833887	0
TCONS_00099963	TCONS_00235169	0.725468	2.79576e-07
TCONS_00099963	TCONS_00235822	0.849769	0
TCONS_00099963	TCONS_00236503	-0.766145	6.39318e-08
TCONS_00099963	TCONS_00243018	0.804392	0
TCONS_00099963	TCONS_00252281	0.721254	3.25381e-07
TCONS_00099963	TCONS_00257167	0.757232	9.07707e-08
TCONS_00099963	TCONS_00269111	0.832915	0
TCONS_00099963	TCONS_00272192	0.934689	0
TCONS_00099963	TCONS_00277277	0.761932	7.58052e-08
TCONS_00099963	TCONS_00303539	0.808281	0
TCONS_00099963	TCONS_00303540	0.796451	7.83564e-09
TCONS_00099963	TCONS_00309503	0.760473	8.02418e-08
TCONS_00099963	TCONS_00316456	-0.719148	3.5135e-07
TCONS_00105347	TCONS_00103196	0.705534	5.86577e-07
TCONS_00105347	TCONS_00218741	0.730654	2.32629e-07
TCONS_00109586	TCONS_00023288	-0.717689	3.70675e-07
TCONS_00109586	TCONS_00133285	-0.713962	4.25657e-07
TCONS_00109586	TCONS_00133315	-0.731464	2.26095e-07
TCONS_00112254	TCONS_00035893	-0.74686	1.32061e-07
TCONS_00112254	TCONS_00040131	0.7091	5.11473e-07
TCONS_00112254	TCONS_00043942	0.765497	6.56725e-08
TCONS_00112254	TCONS_00060553	-0.705048	5.97727e-07
TCONS_00112254	TCONS_00119220	0.743295	1.49641e-07
TCONS_00112254	TCONS_00235822	0.741026	1.6196e-07
TCONS_00112254	TCONS_00303540	0.741674	1.58343e-07
TCONS_00115268	TCONS_00235822	0.706507	5.64955e-07
TCONS_00129522	TCONS_00072673	0.790617	1.55363e-08
TCONS_00129522	TCONS_00081584	-0.753991	1.02322e-07
TCONS_00135528	TCONS_00043942	0.700024	7.27564e-07
TCONS_00146502	TCONS_00224287	0.703266	6.40646e-07
TCONS_00169783	TCONS_00060556	0.73584	1.9401e-07
TCONS_00169783	TCONS_00189589	0.750587	1.15705e-07
TCONS_00171073	TCONS_00023288	-0.72093	3.29234e-07
TCONS_00171073	TCONS_00081623	-0.701483	6.86958e-07
TCONS_00171073	TCONS_00084216	0.714286	4.20532e-07
TCONS_00171073	TCONS_00084224	0.721741	3.19695e-07
TCONS_00171073	TCONS_00103196	0.705534	5.86577e-07
TCONS_00171073	TCONS_00218741	0.748643	1.24e-07
TCONS_00171073	TCONS_00257284	-0.706669	5.61438e-07
TCONS_00173799	TCONS_00142128	-0.706345	5.68497e-07
TCONS_00173799	TCONS_00189589	0.77198	4.95248e-08
TCONS_00173799	TCONS_00208627	0.726602	2.68489e-07
TCONS_00173799	TCONS_00220346	0.720606	3.33138e-07
TCONS_00173799	TCONS_00239251	0.717851	3.6847e-07
TCONS_00173799	TCONS_00272192	0.755935	9.52612e-08
TCONS_00176662	TCONS_00103203	-0.749402	1.12998e-08
TCONS_00176662	TCONS_00133285	-0.719958	3.41099e-07
TCONS_00179644	TCONS_00035891	0.7044	6.12958e-07
TCONS_00179644	TCONS_00235169	0.760635	7.974e-08
TCONS_00179644	TCONS_00235170	0.774897	4.30924e-08
TCONS_00184153	TCONS_00015094	0.761608	7.67758e-08
TCONS_00184153	TCONS_00147258	-0.739243	1.72328e-07
TCONS_00184153	TCONS_00213371	0.78462	2.47749e-08
TCONS_00184153	TCONS_00218741	0.731464	2.26095e-07
TCONS_00184153	TCONS_00272192	0.731626	2.24812e-07
TCONS_00184153	TCONS_00323992	0.722389	3.12285e-07
TCONS_00195904	TCONS_00081583	0.709424	5.05191e-07
TCONS_00199717	TCONS_00035893	-0.700997	7.00213e-07
TCONS_00207514	TCONS_00015911	0.741998	1.56565e-07
TCONS_00207514	TCONS_00040131	0.709748	4.98993e-07
TCONS_00207514	TCONS_00043942	0.729844	2.39365e-07
TCONS_00207514	TCONS_00318258	0.705534	5.86577e-07
TCONS_00216779	TCONS_00094523	-0.747184	1.30561e-07
TCONS_00216779	TCONS_00213371	0.719958	3.41099e-07
TCONS_00221723	TCONS_00316456	-0.710396	4.8685e-07
TCONS_00227745	TCONS_00072673	0.743781	1.47121e-07
TCONS_00227745	TCONS_00133284	-0.730816	2.31306e-07
TCONS_00227745	TCONS_00133285	-0.754315	1.01117e-07
TCONS_00227745	TCONS_00133302	-0.711044	4.75034e-07
TCONS_00227745	TCONS_00133307	-0.748643	1.24e-07
TCONS_00227745	TCONS_00133315	-0.733571	2.10003e-07
TCONS_00227745	TCONS_00133316	-0.729357	2.43506e-07
TCONS_00227745	TCONS_00147258	-0.745402	1.39007e-07
TCONS_00227745	TCONS_00235169	0.75707	9.13229e-08
TCONS_00227745	TCONS_00235170	0.715096	4.08018e-07
TCONS_00227745	TCONS_00235180	-0.778624	3.55354e-08
TCONS_00227745	TCONS_00235215	-0.76339	7.1542e-08
TCONS_00234049	TCONS_00015094	0.744591	1.4301e-07
TCONS_00244628	TCONS_00257167	0.708452	5.24298e-07
TCONS_00259359	TCONS_00125356	-0.715096	4.08018e-07
TCONS_00261558	TCONS_00195890	0.717851	3.6847e-07
TCONS_00272630	TCONS_00060912	0.718985	3.53441e-07
TCONS_00272630	TCONS_00077299	0.752532	1.0789e-07
TCONS_00272630	TCONS_00142128	-0.701483	6.86958e-07
TCONS_00272630	TCONS_00168196	0.748319	1.25432e-07
TCONS_00272630	TCONS_00189589	0.779759	3.33729e-08
TCONS_00272630	TCONS_00192743	-0.772142	4.91548e-08
TCONS_00272630	TCONS_00208627	0.720606	3.33138e-07
TCONS_00272630	TCONS_00269019	-0.716068	3.93545e-07
TCONS_00272630	TCONS_00272192	0.771818	4.98964e-08
TCONS_00275237	TCONS_00142128	-0.789158	1.76539e-08
TCONS_00275237	TCONS_00147258	-0.721903	3.17825e-07
TCONS_00275237	TCONS_00152077	0.73033	2.35298e-07
TCONS_00275237	TCONS_00192743	-0.733409	2.11197e-07
TCONS_00276356	TCONS_00007692	0.701645	6.826e-07
TCONS_00276356	TCONS_00072673	0.824812	0
TCONS_00276356	TCONS_00094523	-0.705696	5.82911e-07
TCONS_00276356	TCONS_00133285	-0.733085	2.13606e-07
TCONS_00276356	TCONS_00133315	-0.721092	3.27301e-07
TCONS_00276356	TCONS_00139883	-0.761284	7.77551e-08
TCONS_00276356	TCONS_00228215	0.717203	3.77376e-07
TCONS_00276356	TCONS_00309503	0.702941	6.48807e-07
TCONS_00277611	TCONS_00007692	0.719958	3.41099e-07
TCONS_00277611	TCONS_00015094	0.800016	3.69647e-09
TCONS_00277611	TCONS_00035898	0.713637	4.30851e-07
TCONS_00277611	TCONS_00040137	0.751074	1.13707e-07
TCONS_00277611	TCONS_00125965	-0.705696	5.82911e-07
TCONS_00277611	TCONS_00133285	-0.731302	2.27386e-07
TCONS_00277611	TCONS_00133307	-0.727251	2.6237e-07
TCONS_00277611	TCONS_00133315	-0.711855	4.60708e-07
TCONS_00277611	TCONS_00147258	-0.710234	4.89855e-07
TCONS_00277611	TCONS_00213371	0.783486	2.66876e-08
TCONS_00277611	TCONS_00218741	0.757232	9.07707e-08
TCONS_00277611	TCONS_00228215	0.740053	1.67536e-07
TCONS_00277611	TCONS_00243018	0.732112	2.21009e-07
TCONS_00277611	TCONS_00257284	-0.713637	4.30851e-07
TCONS_00277611	TCONS_00269012	0.742809	1.52202e-07
TCONS_00277611	TCONS_00272192	0.720768	3.31179e-07
TCONS_00284708	TCONS_00272192	0.708452	5.24298e-07
TCONS_00293428	TCONS_00015102	-0.701645	6.826e-07
TCONS_00305669	TCONS_00007692	0.709424	5.05191e-07
TCONS_00305669	TCONS_00015094	0.785593	2.31787e-08
TCONS_00305669	TCONS_00040131	0.747346	1.29817e-07
TCONS_00305669	TCONS_00043942	0.748643	1.24e-07
TCONS_00305669	TCONS_00056998	0.733733	2.08817e-07
TCONS_00305669	TCONS_00060566	-0.705859	5.7927e-07
TCONS_00305669	TCONS_00125349	-0.775707	4.13885e-08
TCONS_00305669	TCONS_00133315	-0.717365	3.75128e-07
TCONS_00305669	TCONS_00208627	0.716555	3.86523e-07
TCONS_00305669	TCONS_00252281	0.792237	1.32761e-08
TCONS_00305669	TCONS_00269111	0.717689	3.70675e-07
TCONS_00305669	TCONS_00316454	0.842152	0
TCONS_00305669	TCONS_00316456	-0.760635	7.974e-08
TCONS_00305669	TCONS_00316467	0.723523	2.99768e-07
TCONS_00306314	TCONS_00257288	-0.730816	2.31306e-07
TCONS_00310095	TCONS_00043942	0.728871	2.47725e-07
TCONS_00310095	TCONS_00142117	0.806175	0
TCONS_00310095	TCONS_00152077	0.73503	1.99571e-07
TCONS_00310095	TCONS_00213371	0.787375	2.03531e-08
TCONS_00310095	TCONS_00235822	0.729519	2.42117e-07
TCONS_00310095	TCONS_00303539	0.707479	5.44208e-07
TCONS_00310095	TCONS_00303540	0.774735	4.34374e-08
TCONS_00311953	TCONS_00007692	0.761608	7.67758e-08
TCONS_00311953	TCONS_00035898	0.723037	3.05063e-07
TCONS_00311953	TCONS_00060553	-0.7689	5.68563e-08
TCONS_00311953	TCONS_00072673	0.789806	1.67028e-08
TCONS_00311953	TCONS_00133284	-0.775221	4.24066e-08
TCONS_00311953	TCONS_00133285	-0.764201	6.92452e-08
TCONS_00311953	TCONS_00133302	-0.775059	4.27488e-08
TCONS_00311953	TCONS_00133307	-0.771331	5.10204e-08
TCONS_00311953	TCONS_00133315	-0.819302	0
TCONS_00311953	TCONS_00133316	-0.737947	1.80282e-07
TCONS_00311953	TCONS_00147258	-0.77749	3.77606e-08
TCONS_00311953	TCONS_00208633	-0.735516	1.96215e-07
TCONS_00311953	TCONS_00213371	0.710558	4.83866e-07
TCONS_00311953	TCONS_00228215	0.705859	5.7927e-07
TCONS_00311953	TCONS_00235159	0.706021	5.75654e-07
TCONS_00311953	TCONS_00235169	0.736002	1.92917e-07
TCONS_00311953	TCONS_00235215	-0.761121	7.8248e-08
TCONS_00311953	TCONS_00243018	0.833887	0
TCONS_00311953	TCONS_00257167	0.723685	2.98025e-07
TCONS_00311953	TCONS_00309503	0.787213	2.06047e-08
TCONS_00311954	TCONS_00133285	-0.71623	3.91188e-07
TCONS_00311954	TCONS_00133315	-0.70359	6.32598e-07
TCONS_00315898	TCONS_00015094	0.765659	6.52345e-08
TCONS_00315898	TCONS_00015911	0.70359	6.32598e-07
TCONS_00315898	TCONS_00213371	0.749453	1.20482e-07
TCONS_00315898	TCONS_00272192	0.753505	1.04151e-07
TCONS_00335557	TCONS_00192743	-0.714124	4.23086e-07
TCONS_00335557	TCONS_00208627	0.755611	9.64103e-08

## Sheet: Table S8_CD4_grey
lncRNA	mRNA	correlation coefficient	p-value
TCONS_00010410	TCONS_00002976	0.721903	3.17825e-07
TCONS_00029912	TCONS_00014551	0.843935	0
TCONS_00029912	TCONS_00071235	-0.734219	2.05298e-07
TCONS_00029912	TCONS_00189589	-0.731626	2.24812e-07
TCONS_00029912	TCONS_00282811	-0.70062	2.39419e-07
TCONS_00030628	TCONS_00117112	0.708127	5.30844e-07
TCONS_00040163	TCONS_00270595	-0.702131	6.69708e-07
TCONS_00040166	TCONS_00040131	0.803257	2.79472e-10
TCONS_00059844	TCONS_00103480	0.721578	3.21578e-07
TCONS_00060530	TCONS_00002977	-0.708938	5.14646e-07
TCONS_00060530	TCONS_00133285	-0.753991	1.02322e-07
TCONS_00060530	TCONS_00133307	-0.719148	3.5135e-07
TCONS_00060530	TCONS_00133315	-0.709424	5.05191e-07
TCONS_00062028	TCONS_00143803	-0.74605	1.3588e-07
TCONS_00068036	TCONS_00117135	-0.713313	4.36115e-07
TCONS_00078135	TCONS_00133285	-0.765497	6.56725e-08
TCONS_00078135	TCONS_00133315	-0.735192	1.98446e-07
TCONS_00078135	TCONS_00147258	-0.74686	1.32061e-07
TCONS_00081196	TCONS_00069569	0.719472	3.47209e-07
TCONS_00084957	TCONS_00015094	-0.702617	6.5708e-07
TCONS_00084957	TCONS_00053042	0.703266	6.40646e-07
TCONS_00084957	TCONS_00069584	0.759663	8.2785e-08
TCONS_00084957	TCONS_00081605	-0.738595	1.7626e-07
TCONS_00084957	TCONS_00105903	-0.707641	5.40833e-07
TCONS_00084957	TCONS_00147258	0.702131	6.69708e-07
TCONS_00084957	TCONS_00176210	0.707155	5.51029e-07
TCONS_00084957	TCONS_00228215	-0.758042	8.80475e-08
TCONS_00084957	TCONS_00258275	0.72563	2.77962e-07
TCONS_00084957	TCONS_00269111	-0.713637	4.30851e-07
TCONS_00084957	TCONS_00291739	0.730168	2.36646e-07
TCONS_00096804	TCONS_00053052	0.715906	3.95917e-07
TCONS_00100735	TCONS_00156124	0.703103	6.44712e-07
TCONS_00100735	TCONS_00239251	-0.762742	7.34159e-08
TCONS_00125601	TCONS_00057014	0.741188	1.61048e-07
TCONS_00127929	TCONS_00252273	0.726632	5.09352e-08
TCONS_00127974	TCONS_00021690	0.786403	2.18783e-08
TCONS_00133102	TCONS_00047366	0.761932	7.58052e-08
TCONS_00135094	TCONS_00060423	-0.7138	4.28245e-07
TCONS_00142424	TCONS_00224470	0.715678	9.97778e-08
TCONS_00154603	TCONS_00001903	-0.73584	1.9401e-07
TCONS_00154603	TCONS_00316454	0.717203	3.77376e-07
TCONS_00161957	TCONS_00117132	0.743943	1.4629e-07
TCONS_00167158	TCONS_00167578	-0.708289	5.2756e-07
TCONS_00173212	TCONS_00051933	-0.71931	3.49273e-07
TCONS_00173212	TCONS_00060422	-0.7091	5.11473e-07
TCONS_00203933	TCONS_00040133	-0.71623	3.91188e-07
TCONS_00207631	TCONS_00048092	0.712341	4.52344e-07
TCONS_00207631	TCONS_00270595	0.706345	5.68497e-07
TCONS_00212088	TCONS_00242003	0.702617	6.5708e-07
TCONS_00223005	TCONS_00040137	-0.737273	2.56871e-08
TCONS_00252342	TCONS_00072673	0.712989	4.41452e-07
TCONS_00265160	TCONS_00062063	-0.706993	5.54475e-07
TCONS_00265160	TCONS_00094509	0.707803	5.3748e-07
TCONS_00284528	TCONS_00154857	-0.702131	6.69708e-07
TCONS_00299675	TCONS_00048092	0.787862	1.96046e-08
TCONS_00301119	TCONS_00210222	-0.712573	1.20056e-07
TCONS_00302006	TCONS_00048105	0.714448	4.17995e-07
TCONS_00302006	TCONS_00053042	0.727575	2.59368e-07
TCONS_00302006	TCONS_00125352	0.702293	6.6547e-07
TCONS_00302006	TCONS_00153275	0.745077	1.40596e-07
TCONS_00302006	TCONS_00156124	0.80423	0
TCONS_00302006	TCONS_00176325	0.756584	9.2995e-08
TCONS_00304165	TCONS_00139640	0.703266	6.40646e-07
TCONS_00306113	TCONS_00037269	-0.739081	1.73303e-07
TCONS_00332782	TCONS_00167578	0.714772	4.12973e-07
TCONS_00335997	TCONS_00341240	-0.706507	5.64955e-07
TCONS_00340908	TCONS_00021690	0.708452	5.24298e-07
TCONS_00340908	TCONS_00176736	0.712179	4.55113e-07
TCONS_00340908	TCONS_00328628	0.701321	6.91345e-07
TCONS_00341325	TCONS_00341241	0.792092	4.15063e-10
TCONS_00341326	TCONS_00341241	0.79063	4.70577e-10
TCONS_00341340	TCONS_00341241	0.710253	1.37632e-07

## Sheet: Table S8_CD4_purple
lncRNA	mRNA	correlation coefficient	p-value
TCONS_00119902	TCONS_00183609	0.707965	5.34151e-07
TCONS_00128106	TCONS_00035893	-0.774573	4.37838e-08

## Sheet: Table S8_CD4_turquoise
lncRNA	mRNA	correlation coefficient	p-value
TCONS_00001431	TCONS_00015094	-0.709748	4.98993e-07
TCONS_00001431	TCONS_00035507	0.701321	6.91345e-07
TCONS_00001431	TCONS_00053050	0.722713	3.0865e-07
TCONS_00001431	TCONS_00117134	0.703266	6.40646e-07
TCONS_00001431	TCONS_00208398	0.718013	3.6628e-07
TCONS_00001489	TCONS_00001904	0.724435	5.84385e-08
TCONS_00001489	TCONS_00015094	-0.718758	8.28524e-08
TCONS_00001489	TCONS_00224143	0.726381	5.17442e-08
TCONS_00001489	TCONS_00291739	0.706756	1.68701e-07
TCONS_00002072	TCONS_00043942	-0.752046	1.09801e-07
TCONS_00002072	TCONS_00048115	0.701969	6.73976e-07
TCONS_00002072	TCONS_00117134	0.746536	1.33577e-07
TCONS_00002072	TCONS_00133304	-0.71072	4.80902e-07
TCONS_00002072	TCONS_00208386	0.734868	2.00703e-07
TCONS_00002072	TCONS_00208393	0.7091	5.11473e-07
TCONS_00002072	TCONS_00236503	0.727737	2.5788e-07
TCONS_00002072	TCONS_00309589	0.77279	4.76898e-08
TCONS_00002072	TCONS_00316467	-0.725306	2.812e-07
TCONS_00002074	TCONS_00048123	0.738271	1.7826e-07
TCONS_00002074	TCONS_00053042	0.824487	0
TCONS_00002074	TCONS_00053050	0.787375	2.03531e-08
TCONS_00002074	TCONS_00069584	0.775545	4.17265e-08
TCONS_00002074	TCONS_00071233	0.731464	2.26095e-07
TCONS_00002074	TCONS_00117128	0.729195	2.44904e-07
TCONS_00002074	TCONS_00117134	0.717527	3.72894e-07
TCONS_00002074	TCONS_00125968	0.715096	4.08018e-07
TCONS_00002074	TCONS_00133304	-0.76258	7.38896e-08
TCONS_00002074	TCONS_00147258	0.733247	2.12398e-07
TCONS_00002074	TCONS_00168196	-0.894174	0
TCONS_00002074	TCONS_00189589	-0.782027	2.9229e-08
TCONS_00002074	TCONS_00192743	0.817519	0
TCONS_00002074	TCONS_00207513	0.70359	6.32598e-07
TCONS_00002074	TCONS_00208389	0.832591	0
TCONS_00002074	TCONS_00208393	0.739405	1.71359e-07
TCONS_00002074	TCONS_00208398	0.752856	1.06632e-07
TCONS_00002074	TCONS_00208627	-0.767928	5.92955e-08
TCONS_00002074	TCONS_00224414	0.711531	4.6638e-07
TCONS_00002074	TCONS_00272192	-0.845718	0
TCONS_00002074	TCONS_00291739	0.873106	0
TCONS_00002604	TCONS_00053042	0.716068	3.93545e-07
TCONS_00002604	TCONS_00207509	0.731788	2.23537e-07
TCONS_00002604	TCONS_00207511	0.777976	3.67991e-08
TCONS_00002981	TCONS_00117112	0.816546	0
TCONS_00002981	TCONS_00125968	0.714286	4.20532e-07
TCONS_00002981	TCONS_00143822	0.706507	5.64955e-07
TCONS_00002981	TCONS_00192743	0.76177	7.62894e-08
TCONS_00002981	TCONS_00208389	0.712827	4.44147e-07
TCONS_00002981	TCONS_00291739	0.748319	1.25432e-07
TCONS_00002982	TCONS_00064942	0.70359	6.32598e-07
TCONS_00002982	TCONS_00079848	0.730168	2.36646e-07
TCONS_00002982	TCONS_00176325	0.706507	5.64955e-07
TCONS_00002982	TCONS_00334772	-0.704238	6.16832e-07
TCONS_00003381	TCONS_00001904	0.780407	3.21646e-08
TCONS_00003381	TCONS_00007692	-0.808605	0
TCONS_00003381	TCONS_00015094	-0.730006	2.38001e-07
TCONS_00003381	TCONS_00035507	0.730816	2.31306e-07
TCONS_00003381	TCONS_00053042	0.749129	1.21879e-07
TCONS_00003381	TCONS_00053050	0.791751	1.39441e-08
TCONS_00003381	TCONS_00057000	0.715744	3.98305e-07
TCONS_00003381	TCONS_00060553	0.738919	1.74283e-07
TCONS_00003381	TCONS_00069584	0.791265	1.46207e-08
TCONS_00003381	TCONS_00071233	0.762904	7.29444e-08
TCONS_00003381	TCONS_00083960	0.700348	7.1832e-07
TCONS_00003381	TCONS_00094509	0.730006	2.38001e-07
TCONS_00003381	TCONS_00094523	0.725306	2.812e-07
TCONS_00003381	TCONS_00117134	0.84669	0
TCONS_00003381	TCONS_00127017	0.728709	2.49149e-07
TCONS_00003381	TCONS_00133302	0.708127	5.30844e-07
TCONS_00003381	TCONS_00133304	-0.792723	1.26166e-08
TCONS_00003381	TCONS_00133315	0.740864	1.62876e-07
TCONS_00003381	TCONS_00147258	0.713962	4.25657e-07
TCONS_00003381	TCONS_00176210	0.717689	3.70675e-07
TCONS_00003381	TCONS_00183612	0.712665	4.46861e-07
TCONS_00003381	TCONS_00192743	0.763714	7.06173e-08
TCONS_00003381	TCONS_00207513	0.740216	1.66594e-07
TCONS_00003381	TCONS_00208389	0.757556	8.96739e-08
TCONS_00003381	TCONS_00208393	0.73503	1.99571e-07
TCONS_00003381	TCONS_00208398	0.723199	3.03287e-07
TCONS_00003381	TCONS_00208627	-0.703428	6.36609e-07
TCONS_00003381	TCONS_00208629	-0.724334	2.91166e-07
TCONS_00003381	TCONS_00224414	0.747994	1.26879e-07
TCONS_00003381	TCONS_00234888	0.725306	2.812e-07
TCONS_00003381	TCONS_00236503	0.712341	4.52344e-07
TCONS_00003381	TCONS_00258275	0.728223	2.53474e-07
TCONS_00003381	TCONS_00269111	-0.718499	3.59797e-07
TCONS_00003381	TCONS_00272192	-0.814926	0
TCONS_00003381	TCONS_00291723	0.733895	2.07637e-07
TCONS_00003381	TCONS_00291739	0.762256	7.48432e-08
TCONS_00003381	TCONS_00309589	0.775059	4.27488e-08
TCONS_00003381	TCONS_00332250	0.732437	2.18512e-07
TCONS_00003381	TCONS_00334774	0.756746	9.2435e-08
TCONS_00006316	TCONS_00007692	-0.713475	4.33474e-07
TCONS_00006316	TCONS_00037281	-0.712665	4.46861e-07
TCONS_00006316	TCONS_00051525	0.758691	8.59137e-08
TCONS_00006316	TCONS_00071233	0.761932	7.58052e-08
TCONS_00006316	TCONS_00133285	0.731626	2.24812e-07
TCONS_00006316	TCONS_00133315	0.709424	5.05191e-07
TCONS_00006316	TCONS_00235178	-0.749291	1.21179e-07
TCONS_00006501	TCONS_00048119	0.731302	2.27386e-07
TCONS_00006501	TCONS_00048123	0.724009	2.94574e-07
TCONS_00006501	TCONS_00053042	0.821084	0
TCONS_00006501	TCONS_00071233	0.721741	3.19695e-07
TCONS_00006501	TCONS_00105505	0.700186	7.22926e-07
TCONS_00006501	TCONS_00125968	0.741998	1.56565e-07
TCONS_00006501	TCONS_00133304	-0.741836	1.57452e-07
TCONS_00006501	TCONS_00168196	-0.701645	6.826e-07
TCONS_00006501	TCONS_00192743	0.733247	2.12398e-07
TCONS_00006501	TCONS_00207509	0.721903	3.17825e-07
TCONS_00006501	TCONS_00208389	0.737298	1.84397e-07
TCONS_00006501	TCONS_00208398	0.777652	3.74388e-08
TCONS_00006501	TCONS_00208627	-0.718499	3.59797e-07
TCONS_00006501	TCONS_00272192	-0.740702	1.63798e-07
TCONS_00016786	TCONS_00174107	0.71461	4.15476e-07
TCONS_00016810	TCONS_00117112	0.700673	7.09203e-07
TCONS_00017148	TCONS_00023288	0.74135	1.60142e-07
TCONS_00017148	TCONS_00057291	0.722227	3.14119e-07
TCONS_00017148	TCONS_00099636	0.701159	6.95764e-07
TCONS_00017148	TCONS_00099638	0.727575	2.59368e-07
TCONS_00017148	TCONS_00099639	0.762094	7.53231e-08
TCONS_00017148	TCONS_00099650	0.701807	6.78273e-07
TCONS_00017148	TCONS_00139883	0.787213	2.06047e-08
TCONS_00017148	TCONS_00190922	-0.700997	7.00213e-07
TCONS_00017148	TCONS_00190942	-0.726116	2.73181e-07
TCONS_00017148	TCONS_00198776	0.702617	6.5708e-07
TCONS_00017183	TCONS_00133302	0.743619	1.47957e-07
TCONS_00017183	TCONS_00133305	-0.700348	7.1832e-07
TCONS_00017183	TCONS_00133319	0.730816	2.31306e-07
TCONS_00017973	TCONS_00053042	0.794992	9.64954e-09
TCONS_00017973	TCONS_00089558	-0.71542	4.03129e-07
TCONS_00017973	TCONS_00117112	0.761446	7.72644e-08
TCONS_00017973	TCONS_00117128	0.767766	5.97081e-08
TCONS_00017973	TCONS_00117132	0.724334	2.91166e-07
TCONS_00017973	TCONS_00125968	0.749453	1.20482e-07
TCONS_00017973	TCONS_00143822	0.738433	1.77257e-07
TCONS_00017973	TCONS_00168196	-0.788186	1.91108e-08
TCONS_00017973	TCONS_00174107	0.728385	2.52024e-07
TCONS_00017973	TCONS_00192743	0.843449	0
TCONS_00017973	TCONS_00208389	0.859979	0
TCONS_00017973	TCONS_00208398	0.803744	0
TCONS_00017973	TCONS_00208627	-0.706831	5.57944e-07
TCONS_00017973	TCONS_00272192	-0.726278	2.71607e-07
TCONS_00017973	TCONS_00291739	0.805526	0
TCONS_00017977	TCONS_00048105	0.764363	6.87918e-08
TCONS_00017977	TCONS_00048123	0.705859	5.7927e-07
TCONS_00017977	TCONS_00053042	0.774248	4.44809e-08
TCONS_00017977	TCONS_00064942	0.717689	3.70675e-07
TCONS_00017977	TCONS_00079848	0.742809	1.52202e-07
TCONS_00017977	TCONS_00089558	-0.728547	2.50582e-07
TCONS_00017977	TCONS_00103485	0.717365	3.75128e-07
TCONS_00017977	TCONS_00105505	0.712017	4.57901e-07
TCONS_00017977	TCONS_00117112	0.808768	0
TCONS_00017977	TCONS_00117128	0.705859	5.7927e-07
TCONS_00017977	TCONS_00117132	0.75318	1.05385e-07
TCONS_00017977	TCONS_00125968	0.706831	5.57944e-07
TCONS_00017977	TCONS_00143822	0.815088	0
TCONS_00017977	TCONS_00156124	0.764687	6.78909e-08
TCONS_00017977	TCONS_00168196	-0.808768	0
TCONS_00017977	TCONS_00174107	0.702455	6.6126e-07
TCONS_00017977	TCONS_00176325	0.750587	1.15705e-07
TCONS_00017977	TCONS_00189589	-0.701321	6.91345e-07
TCONS_00017977	TCONS_00192743	0.865975	0
TCONS_00017977	TCONS_00208389	0.878292	0
TCONS_00017977	TCONS_00208398	0.807147	0
TCONS_00017977	TCONS_00208627	-0.776679	3.93894e-08
TCONS_00017977	TCONS_00284644	0.758042	8.80475e-08
TCONS_00017977	TCONS_00291739	0.816709	0
TCONS_00017977	TCONS_00334772	-0.71542	4.03129e-07
TCONS_00019577	TCONS_00156124	0.753018	1.06007e-07
TCONS_00019577	TCONS_00168196	-0.7138	4.28245e-07
TCONS_00019577	TCONS_00192743	0.702617	6.5708e-07
TCONS_00019790	TCONS_00060422	0.712017	4.57901e-07
TCONS_00019790	TCONS_00235215	0.750587	1.15705e-07
TCONS_00020875	TCONS_00015094	-0.720444	3.35108e-07
TCONS_00020875	TCONS_00288619	0.72563	2.77962e-07
TCONS_00022723	TCONS_00168196	-0.700186	7.22926e-07
TCONS_00025720	TCONS_00060556	-0.713313	4.36115e-07
TCONS_00025720	TCONS_00117112	0.769387	5.56596e-08
TCONS_00025720	TCONS_00147258	0.731464	2.26095e-07
TCONS_00025720	TCONS_00192743	0.827567	0
TCONS_00025720	TCONS_00208389	0.803906	0
TCONS_00025720	TCONS_00291739	0.775707	4.13885e-08
TCONS_00028170	TCONS_00291739	0.710234	4.89855e-07
TCONS_00028991	TCONS_00010809	0.707317	5.47607e-07
TCONS_00028991	TCONS_00015094	-0.748643	1.24e-07
TCONS_00028991	TCONS_00023288	0.88915	0
TCONS_00028991	TCONS_00035898	-0.722875	3.06851e-07
TCONS_00028991	TCONS_00051931	0.721254	3.25381e-07
TCONS_00028991	TCONS_00051933	0.718985	3.53441e-07
TCONS_00028991	TCONS_00053050	0.714286	4.20532e-07
TCONS_00028991	TCONS_00060422	0.793696	1.1323e-08
TCONS_00028991	TCONS_00069584	0.833725	0
TCONS_00028991	TCONS_00071233	0.72644	2.70043e-07
TCONS_00028991	TCONS_00081605	-0.70051	7.13746e-07
TCONS_00028991	TCONS_00081623	0.742809	1.52202e-07
TCONS_00028991	TCONS_00094509	0.751722	1.1109e-07
TCONS_00028991	TCONS_00094523	0.748157	1.26153e-07
TCONS_00028991	TCONS_00099650	0.701483	6.86958e-07
TCONS_00028991	TCONS_00099953	0.766956	6.17974e-08
TCONS_00028991	TCONS_00103196	-0.714934	4.10487e-07
TCONS_00028991	TCONS_00114962	0.710072	4.9288e-07
TCONS_00028991	TCONS_00117134	0.700673	7.09203e-07
TCONS_00028991	TCONS_00133285	0.789158	1.76539e-08
TCONS_00028991	TCONS_00133302	0.711693	4.63535e-07
TCONS_00028991	TCONS_00133304	-0.719796	3.43123e-07
TCONS_00028991	TCONS_00133307	0.722551	3.10462e-07
TCONS_00028991	TCONS_00133315	0.766956	6.17974e-08
TCONS_00028991	TCONS_00133319	0.706993	5.54475e-07
TCONS_00028991	TCONS_00139883	0.79483	9.85554e-09
TCONS_00028991	TCONS_00143809	0.734219	2.05298e-07
TCONS_00028991	TCONS_00147258	0.752694	1.07259e-07
TCONS_00028991	TCONS_00176209	0.723847	2.96294e-07
TCONS_00028991	TCONS_00178541	0.762256	7.48432e-08
TCONS_00028991	TCONS_00183612	0.725468	2.79576e-07
TCONS_00028991	TCONS_00183616	0.758853	8.53863e-08
TCONS_00028991	TCONS_00189576	0.741998	1.56565e-07
TCONS_00028991	TCONS_00208627	-0.700997	7.00213e-07
TCONS_00028991	TCONS_00228083	0.738757	1.75269e-07
TCONS_00028991	TCONS_00235169	-0.732437	2.18512e-07
TCONS_00028991	TCONS_00235170	-0.740702	1.63798e-07
TCONS_00028991	TCONS_00257284	0.718823	3.55545e-07
TCONS_00028991	TCONS_00257289	0.728061	2.54934e-07
TCONS_00028991	TCONS_00258275	0.791103	1.48481e-08
TCONS_00028991	TCONS_00272192	-0.746212	1.35108e-07
TCONS_00028991	TCONS_00291723	0.706021	5.75654e-07
TCONS_00028991	TCONS_00291739	0.707155	5.51029e-07
TCONS_00028991	TCONS_00309503	-0.745888	1.36655e-07
TCONS_00029458	TCONS_00007692	-0.724171	2.92864e-07
TCONS_00029458	TCONS_00051525	0.704886	6.01496e-07
TCONS_00029458	TCONS_00060556	-0.72482	2.86135e-07
TCONS_00030529	TCONS_00053050	0.724658	2.87802e-07
TCONS_00030529	TCONS_00143809	0.753667	1.03538e-07
TCONS_00030964	TCONS_00001904	0.706993	5.54475e-07
TCONS_00030964	TCONS_00015094	-0.857386	0
TCONS_00030964	TCONS_00053050	0.738919	1.74283e-07
TCONS_00030964	TCONS_00081605	-0.709748	4.98993e-07
TCONS_00030964	TCONS_00117128	0.703914	6.24661e-07
TCONS_00030964	TCONS_00156140	0.700997	7.00213e-07
TCONS_00030964	TCONS_00192743	0.738433	1.77257e-07
TCONS_00030964	TCONS_00207513	0.743457	1.48797e-07
TCONS_00030964	TCONS_00208393	0.712989	4.41452e-07
TCONS_00030964	TCONS_00208398	0.707803	5.3748e-07
TCONS_00030964	TCONS_00269111	-0.759501	8.33005e-08
TCONS_00030964	TCONS_00272192	-0.765497	6.56725e-08
TCONS_00030964	TCONS_00291739	0.718823	3.55545e-07
TCONS_00030964	TCONS_00334774	0.737136	1.85441e-07
TCONS_00030965	TCONS_00015094	-0.708452	5.24298e-07
TCONS_00030965	TCONS_00043942	-0.767928	5.92955e-08
TCONS_00030965	TCONS_00048119	0.732923	2.14822e-07
TCONS_00030965	TCONS_00156124	0.750425	1.16377e-07
TCONS_00030965	TCONS_00168196	-0.722551	3.10462e-07
TCONS_00030965	TCONS_00208393	0.701969	6.73976e-07
TCONS_00030965	TCONS_00208627	-0.813791	0
TCONS_00030965	TCONS_00224287	-0.726602	2.68489e-07
TCONS_00030965	TCONS_00252281	-0.725792	2.76358e-07
TCONS_00030965	TCONS_00272192	-0.750263	1.17053e-07
TCONS_00030965	TCONS_00316454	-0.743295	1.49641e-07
TCONS_00030968	TCONS_00015094	-0.73033	2.35298e-07
TCONS_00030968	TCONS_00053042	0.732112	2.21009e-07
TCONS_00030968	TCONS_00103196	-0.701807	6.78273e-07
TCONS_00030968	TCONS_00156124	0.714286	4.20532e-07
TCONS_00030968	TCONS_00192743	0.749453	1.20482e-07
TCONS_00030968	TCONS_00208389	0.740216	1.66594e-07
TCONS_00030968	TCONS_00208398	0.761446	7.72644e-08
TCONS_00030968	TCONS_00208627	-0.740378	1.65657e-07
TCONS_00030968	TCONS_00272192	-0.760797	7.92404e-08
TCONS_00030968	TCONS_00291739	0.7138	4.28245e-07
TCONS_00034184	TCONS_00147258	0.750912	1.1437e-07
TCONS_00034184	TCONS_00168196	-0.783	2.75244e-08
TCONS_00034184	TCONS_00208389	0.715258	4.05565e-07
TCONS_00034184	TCONS_00291739	0.733409	2.11197e-07
TCONS_00034184	TCONS_00328609	-0.733247	2.12398e-07
TCONS_00034701	TCONS_00025733	0.705859	5.7927e-07
TCONS_00039056	TCONS_00007692	-0.728223	2.53474e-07
TCONS_00039056	TCONS_00069584	0.739405	1.71359e-07
TCONS_00039244	TCONS_00053042	0.720768	3.31179e-07
TCONS_00039244	TCONS_00143822	0.739891	1.68484e-07
TCONS_00039244	TCONS_00168196	-0.732923	2.14822e-07
TCONS_00039244	TCONS_00189589	-0.720606	3.33138e-07
TCONS_00039244	TCONS_00192743	0.745888	1.36655e-07
TCONS_00039244	TCONS_00208389	0.755125	9.81544e-08
TCONS_00039244	TCONS_00208627	-0.741674	1.58343e-07
TCONS_00039244	TCONS_00224441	0.701159	6.95764e-07
TCONS_00039244	TCONS_00291739	0.786403	2.18783e-08
TCONS_00039246	TCONS_00010809	0.730816	2.31306e-07
TCONS_00039246	TCONS_00015094	-0.752532	1.0789e-07
TCONS_00039246	TCONS_00023288	0.918483	0
TCONS_00039246	TCONS_00035898	-0.803582	0
TCONS_00039246	TCONS_00051931	0.765983	6.43642e-08
TCONS_00039246	TCONS_00051933	0.729357	2.43506e-07
TCONS_00039246	TCONS_00060422	0.824974	0
TCONS_00039246	TCONS_00069584	0.80423	0
TCONS_00039246	TCONS_00071233	0.742646	1.53065e-07
TCONS_00039246	TCONS_00081623	0.794344	1.0479e-08
TCONS_00039246	TCONS_00094509	0.762904	7.29444e-08
TCONS_00039246	TCONS_00094523	0.718337	3.61944e-07
TCONS_00039246	TCONS_00097189	0.751398	1.12392e-07
TCONS_00039246	TCONS_00099650	0.707965	5.34151e-07
TCONS_00039246	TCONS_00099951	0.726764	2.66945e-07
TCONS_00039246	TCONS_00099953	0.774573	4.37838e-08
TCONS_00039246	TCONS_00103196	-0.701321	6.91345e-07
TCONS_00039246	TCONS_00114966	0.720282	3.37092e-07
TCONS_00039246	TCONS_00125359	0.707479	5.44208e-07
TCONS_00039246	TCONS_00127017	0.701483	6.86958e-07
TCONS_00039246	TCONS_00133284	0.721092	3.27301e-07
TCONS_00039246	TCONS_00133285	0.824325	0
TCONS_00039246	TCONS_00133302	0.730978	2.29992e-07
TCONS_00039246	TCONS_00133307	0.793534	1.15363e-08
TCONS_00039246	TCONS_00133315	0.822219	0
TCONS_00039246	TCONS_00133319	0.705372	5.90268e-07
TCONS_00039246	TCONS_00139883	0.798882	4.96913e-09
TCONS_00039246	TCONS_00143809	0.780569	3.18656e-08
TCONS_00039246	TCONS_00147258	0.769387	5.56596e-08
TCONS_00039246	TCONS_00178541	0.74216	1.55683e-07
TCONS_00039246	TCONS_00189576	0.79872	5.15428e-09
TCONS_00039246	TCONS_00189580	0.700186	7.22926e-07
TCONS_00039246	TCONS_00208393	0.704724	6.0529e-07
TCONS_00039246	TCONS_00228083	0.721416	3.23474e-07
TCONS_00039246	TCONS_00235169	-0.752856	1.06632e-07
TCONS_00039246	TCONS_00235170	-0.742646	1.53065e-07
TCONS_00039246	TCONS_00257284	0.759663	8.2785e-08
TCONS_00039246	TCONS_00257289	0.764849	6.74434e-08
TCONS_00039246	TCONS_00258275	0.806823	0
TCONS_00039246	TCONS_00262269	0.786079	2.23952e-08
TCONS_00039246	TCONS_00268999	0.77279	4.76898e-08
TCONS_00039246	TCONS_00272192	-0.707155	5.51029e-07
TCONS_00039246	TCONS_00291723	0.718175	3.64105e-07
TCONS_00039246	TCONS_00291739	0.718985	3.53441e-07
TCONS_00039246	TCONS_00309503	-0.779921	3.3069e-08
TCONS_00039246	TCONS_00309525	0.711531	4.6638e-07
TCONS_00039246	TCONS_00318271	0.724334	2.91166e-07
TCONS_00039246	TCONS_00327825	0.713475	4.33474e-07
TCONS_00039246	TCONS_00334774	0.712665	4.46861e-07
TCONS_00041576	TCONS_00035506	0.915242	0
TCONS_00041576	TCONS_00035507	0.830322	0
TCONS_00041576	TCONS_00035508	0.912325	0
TCONS_00041576	TCONS_00198779	0.70991	4.95927e-07
TCONS_00042162	TCONS_00023288	0.771493	5.06441e-08
TCONS_00042162	TCONS_00035898	-0.749453	1.20482e-07
TCONS_00042162	TCONS_00094509	0.70051	7.13746e-07
TCONS_00042162	TCONS_00262269	0.713475	4.33474e-07
TCONS_00042162	TCONS_00288635	0.702293	6.6547e-07
TCONS_00044623	TCONS_00089558	-0.745077	1.40596e-07
TCONS_00045166	TCONS_00183614	0.701985	2.21641e-07
TCONS_00045819	TCONS_00208389	0.735516	1.96215e-07
TCONS_00045819	TCONS_00208398	0.705696	5.82911e-07
TCONS_00046176	TCONS_00035507	0.711044	4.75034e-07
TCONS_00047604	TCONS_00147258	0.713962	4.25657e-07
TCONS_00049881	TCONS_00048115	0.708776	5.17842e-07
TCONS_00050136	TCONS_00257289	0.701645	6.826e-07
TCONS_00050138	TCONS_00053042	0.7091	5.11473e-07
TCONS_00050138	TCONS_00060556	-0.739405	1.71359e-07
TCONS_00050138	TCONS_00083960	0.711531	4.6638e-07
TCONS_00050138	TCONS_00117112	0.807309	0
TCONS_00050138	TCONS_00117132	0.718013	3.6628e-07
TCONS_00050138	TCONS_00125968	0.770035	5.40873e-08
TCONS_00050138	TCONS_00143822	0.761932	7.58052e-08
TCONS_00050138	TCONS_00147258	0.724334	2.91166e-07
TCONS_00050138	TCONS_00168196	-0.712017	4.57901e-07
TCONS_00050138	TCONS_00192743	0.857224	0
TCONS_00050138	TCONS_00208389	0.753505	1.04151e-07
TCONS_00050138	TCONS_00291739	0.788186	1.91108e-08
TCONS_00050166	TCONS_00208389	0.727251	2.6237e-07
TCONS_00050193	TCONS_00056989	-0.716555	3.86523e-07
TCONS_00050193	TCONS_00328609	-0.730654	2.32629e-07
TCONS_00050204	TCONS_00079848	0.711531	4.6638e-07
TCONS_00051456	TCONS_00208393	0.727251	2.6237e-07
TCONS_00051563	TCONS_00053042	0.7044	6.12958e-07
TCONS_00051563	TCONS_00060556	-0.754477	1.00519e-07
TCONS_00051563	TCONS_00079848	0.720768	3.31179e-07
TCONS_00051563	TCONS_00089558	-0.741674	1.58343e-07
TCONS_00051563	TCONS_00103485	0.750101	1.17732e-07
TCONS_00051563	TCONS_00117112	0.850903	0
TCONS_00051563	TCONS_00143822	0.73114	2.28685e-07
TCONS_00051563	TCONS_00147258	0.749291	1.21179e-07
TCONS_00051563	TCONS_00168196	-0.823515	0
TCONS_00051563	TCONS_00176733	-0.704886	6.01496e-07
TCONS_00051563	TCONS_00189589	-0.735192	1.98446e-07
TCONS_00051563	TCONS_00192743	0.846204	0
TCONS_00051563	TCONS_00208389	0.815736	0
TCONS_00051563	TCONS_00208398	0.744915	1.41396e-07
TCONS_00051563	TCONS_00208627	-0.736002	1.92917e-07
TCONS_00051563	TCONS_00291739	0.815412	0
TCONS_00051564	TCONS_00037271	0.705048	5.97727e-07
TCONS_00051564	TCONS_00048123	0.729682	2.40737e-07
TCONS_00051564	TCONS_00060556	-0.714448	4.17995e-07
TCONS_00051564	TCONS_00089558	-0.713313	4.36115e-07
TCONS_00051564	TCONS_00103485	0.776193	4.03828e-08
TCONS_00051564	TCONS_00117112	0.782514	2.83714e-08
TCONS_00051564	TCONS_00117128	0.715096	4.08018e-07
TCONS_00051564	TCONS_00117134	0.742646	1.53065e-07
TCONS_00051564	TCONS_00143822	0.700024	7.27564e-07
TCONS_00051564	TCONS_00156124	0.720606	3.33138e-07
TCONS_00051564	TCONS_00168196	-0.730654	2.32629e-07
TCONS_00051564	TCONS_00192743	0.860141	0
TCONS_00051564	TCONS_00208389	0.756746	9.2435e-08
TCONS_00051564	TCONS_00208398	0.734868	2.00703e-07
TCONS_00051564	TCONS_00208627	-0.72482	2.86135e-07
TCONS_00051564	TCONS_00269111	-0.716879	3.81919e-07
TCONS_00051564	TCONS_00291739	0.780083	3.27663e-08
TCONS_00051564	TCONS_00334774	0.783324	2.69654e-08
TCONS_00051879	TCONS_00007692	-0.76728	6.09564e-08
TCONS_00051879	TCONS_00015094	-0.719148	3.5135e-07
TCONS_00051879	TCONS_00023288	0.822057	0
TCONS_00051879	TCONS_00035898	-0.768576	5.76625e-08
TCONS_00051879	TCONS_00037281	-0.728061	2.54934e-07
TCONS_00051879	TCONS_00048183	0.75394	8.21156e-09
TCONS_00051879	TCONS_00053042	0.75075	1.15035e-07
TCONS_00051879	TCONS_00060422	0.722065	3.15966e-07
TCONS_00051879	TCONS_00069584	0.843611	0
TCONS_00051879	TCONS_00071233	0.753018	1.06007e-07
TCONS_00051879	TCONS_00081623	0.767118	6.1376e-08
TCONS_00051879	TCONS_00094523	0.796937	7.24686e-09
TCONS_00051879	TCONS_00097174	0.744429	1.43824e-07
TCONS_00051879	TCONS_00099953	0.700186	7.22926e-07
TCONS_00051879	TCONS_00117134	0.728385	2.52024e-07
TCONS_00051879	TCONS_00133285	0.860951	0
TCONS_00051879	TCONS_00133302	0.756098	9.46906e-08
TCONS_00051879	TCONS_00133307	0.783486	2.66876e-08
TCONS_00051879	TCONS_00133315	0.828539	0
TCONS_00051879	TCONS_00133319	0.721741	3.19695e-07
TCONS_00051879	TCONS_00139883	0.73503	1.99571e-07
TCONS_00051879	TCONS_00143809	0.763714	7.06173e-08
TCONS_00051879	TCONS_00147258	0.868082	0
TCONS_00051879	TCONS_00172402	0.73584	1.9401e-07
TCONS_00051879	TCONS_00178541	0.754963	9.87413e-08
TCONS_00051879	TCONS_00183612	0.706669	5.61438e-07
TCONS_00051879	TCONS_00189576	0.748481	1.24714e-07
TCONS_00051879	TCONS_00192743	0.750425	1.16377e-07
TCONS_00051879	TCONS_00208389	0.724496	2.89478e-07
TCONS_00051879	TCONS_00235178	-0.70991	4.95927e-07
TCONS_00051879	TCONS_00257284	0.730816	2.31306e-07
TCONS_00051879	TCONS_00257289	0.725954	2.74764e-07
TCONS_00051879	TCONS_00258275	0.762742	7.34159e-08
TCONS_00051879	TCONS_00262269	0.724982	2.8448e-07
TCONS_00051879	TCONS_00268999	0.756908	9.18776e-08
TCONS_00051879	TCONS_00269111	-0.712665	4.46861e-07
TCONS_00051879	TCONS_00272192	-0.750425	1.16377e-07
TCONS_00051879	TCONS_00291723	0.712503	4.49593e-07
TCONS_00051879	TCONS_00291739	0.777166	3.84081e-08
TCONS_00051879	TCONS_00309503	-0.817843	0
TCONS_00051879	TCONS_00309525	0.733085	2.13606e-07
TCONS_00051879	TCONS_00332250	0.747832	1.27608e-07
TCONS_00051879	TCONS_00334774	0.746698	1.32817e-07
TCONS_00053591	TCONS_00048115	0.703428	6.36609e-07
TCONS_00053591	TCONS_00048123	0.729357	2.43506e-07
TCONS_00053591	TCONS_00060553	0.721092	3.27301e-07
TCONS_00053591	TCONS_00083960	0.71623	3.91188e-07
TCONS_00053591	TCONS_00117134	0.780569	3.18656e-08
TCONS_00053591	TCONS_00133304	-0.80504	0
TCONS_00053591	TCONS_00133305	-0.722227	3.14119e-07
TCONS_00053591	TCONS_00143822	0.725468	2.79576e-07
TCONS_00053591	TCONS_00189580	0.734057	2.06464e-07
TCONS_00053591	TCONS_00208398	0.744429	1.43824e-07
TCONS_00053591	TCONS_00208627	-0.756746	9.2435e-08
TCONS_00059023	TCONS_00023288	0.722875	3.06851e-07
TCONS_00059837	TCONS_00010809	0.712665	4.46861e-07
TCONS_00059837	TCONS_00023288	0.766307	6.35013e-08
TCONS_00059837	TCONS_00051933	0.736488	1.89676e-07
TCONS_00059837	TCONS_00057290	0.706507	5.64955e-07
TCONS_00059837	TCONS_00060422	0.81995	0
TCONS_00059837	TCONS_00094509	0.778786	3.52227e-08
TCONS_00059837	TCONS_00099951	0.724334	2.91166e-07
TCONS_00059837	TCONS_00099953	0.759015	8.48613e-08
TCONS_00059837	TCONS_00103202	0.718985	3.53441e-07
TCONS_00059837	TCONS_00114962	0.704562	6.09111e-07
TCONS_00059837	TCONS_00125346	-0.715906	3.95917e-07
TCONS_00059837	TCONS_00127017	0.791265	1.46207e-08
TCONS_00059837	TCONS_00133285	0.72644	2.70043e-07
TCONS_00059837	TCONS_00133302	0.784782	2.45061e-08
TCONS_00059837	TCONS_00133307	0.73665	1.88608e-07
TCONS_00059837	TCONS_00133315	0.743295	1.49641e-07
TCONS_00059837	TCONS_00178541	0.703428	6.36609e-07
TCONS_00059837	TCONS_00183612	0.758366	8.69757e-08
TCONS_00059837	TCONS_00183616	0.755449	9.69889e-08
TCONS_00059837	TCONS_00189576	0.725468	2.79576e-07
TCONS_00059837	TCONS_00235169	-0.711044	4.75034e-07
TCONS_00059837	TCONS_00235180	0.7091	5.11473e-07
TCONS_00059837	TCONS_00273477	0.719634	3.45159e-07
TCONS_00059837	TCONS_00291723	0.718337	3.61944e-07
TCONS_00059837	TCONS_00309589	0.705048	5.97727e-07
TCONS_00059846	TCONS_00051931	0.700673	7.09203e-07
TCONS_00060410	TCONS_00005724	0.755125	9.81544e-08
TCONS_00060410	TCONS_00035893	0.81055	0
TCONS_00060410	TCONS_00048092	0.704724	6.0529e-07
TCONS_00060410	TCONS_00051943	0.762904	7.29444e-08
TCONS_00060410	TCONS_00060421	0.812333	0
TCONS_00060410	TCONS_00060423	0.702617	6.5708e-07
TCONS_00060410	TCONS_00160840	0.776517	3.97192e-08
TCONS_00060410	TCONS_00167573	0.728061	2.54934e-07
TCONS_00060410	TCONS_00176205	0.79953	4.23692e-09
TCONS_00060410	TCONS_00209767	0.729357	2.43506e-07
TCONS_00060410	TCONS_00224128	0.729357	2.43506e-07
TCONS_00060410	TCONS_00228079	0.704238	6.16832e-07
TCONS_00060410	TCONS_00252270	0.716068	3.93545e-07
TCONS_00060410	TCONS_00270595	0.763877	7.01579e-08
TCONS_00060410	TCONS_00285694	0.819983	3.06974e-11
TCONS_00060410	TCONS_00288625	0.718985	3.53441e-07
TCONS_00060410	TCONS_00316461	0.728871	2.47725e-07
TCONS_00060410	TCONS_00327823	0.709424	5.05191e-07
TCONS_00060410	TCONS_00341241	0.705696	5.82911e-07
TCONS_00060502	TCONS_00071235	-0.724334	2.91166e-07
TCONS_00061147	TCONS_00001904	0.750587	1.15705e-07
TCONS_00061147	TCONS_00015094	-0.824812	0
TCONS_00061147	TCONS_00023288	0.809902	0
TCONS_00061147	TCONS_00043942	-0.746212	1.35108e-07
TCONS_00061147	TCONS_00050901	0.710558	4.83866e-07
TCONS_00061147	TCONS_00051931	0.766307	6.35013e-08
TCONS_00061147	TCONS_00051933	0.71931	3.49273e-07
TCONS_00061147	TCONS_00053050	0.881857	0
TCONS_00061147	TCONS_00057290	0.755935	9.52612e-08
TCONS_00061147	TCONS_00060422	0.776679	3.93894e-08
TCONS_00061147	TCONS_00060553	0.734381	2.04139e-07
TCONS_00061147	TCONS_00060566	0.748805	1.23289e-07
TCONS_00061147	TCONS_00064932	0.75318	1.05385e-07
TCONS_00061147	TCONS_00069584	0.817357	0
TCONS_00061147	TCONS_00071233	0.701483	6.86958e-07
TCONS_00061147	TCONS_00081605	-0.702455	6.6126e-07
TCONS_00061147	TCONS_00094509	0.758853	8.53863e-08
TCONS_00061147	TCONS_00094523	0.756584	9.2995e-08
TCONS_00061147	TCONS_00099640	0.788024	1.93572e-08
TCONS_00061147	TCONS_00099951	0.734381	2.04139e-07
TCONS_00061147	TCONS_00099953	0.790455	1.57676e-08
TCONS_00061147	TCONS_00114962	0.7091	5.11473e-07
TCONS_00061147	TCONS_00114966	0.743943	1.4629e-07
TCONS_00061147	TCONS_00117134	0.73503	1.99571e-07
TCONS_00061147	TCONS_00125359	0.711369	4.69245e-07
TCONS_00061147	TCONS_00125965	0.715744	3.98305e-07
TCONS_00061147	TCONS_00127017	0.733409	2.11197e-07
TCONS_00061147	TCONS_00133284	0.738757	1.75269e-07
TCONS_00061147	TCONS_00133285	0.756584	9.2995e-08
TCONS_00061147	TCONS_00133302	0.728709	2.49149e-07
TCONS_00061147	TCONS_00133304	-0.752532	1.0789e-07
TCONS_00061147	TCONS_00133307	0.714934	4.10487e-07
TCONS_00061147	TCONS_00133315	0.810064	0
TCONS_00061147	TCONS_00133316	0.716393	3.88848e-07
TCONS_00061147	TCONS_00139883	0.718337	3.61944e-07
TCONS_00061147	TCONS_00143809	0.754315	1.01117e-07
TCONS_00061147	TCONS_00147258	0.723847	2.96294e-07
TCONS_00061147	TCONS_00159563	0.702293	6.6547e-07
TCONS_00061147	TCONS_00168196	-0.720768	3.31179e-07
TCONS_00061147	TCONS_00178541	0.793858	1.11106e-08
TCONS_00061147	TCONS_00183612	0.726116	2.73181e-07
TCONS_00061147	TCONS_00183616	0.771818	4.98964e-08
TCONS_00061147	TCONS_00198776	0.721254	3.25381e-07
TCONS_00061147	TCONS_00198779	0.751398	1.12392e-07
TCONS_00061147	TCONS_00208393	0.786727	2.13657e-08
TCONS_00061147	TCONS_00228083	0.826756	0
TCONS_00061147	TCONS_00235169	-0.793858	1.11106e-08
TCONS_00061147	TCONS_00235170	-0.817357	0
TCONS_00061147	TCONS_00235215	0.807633	0
TCONS_00061147	TCONS_00248881	0.731788	2.23537e-07
TCONS_00061147	TCONS_00252281	-0.703914	6.24661e-07
TCONS_00061147	TCONS_00258275	0.751074	1.13707e-07
TCONS_00061147	TCONS_00272192	-0.778948	3.49112e-08
TCONS_00061147	TCONS_00291739	0.703428	6.36609e-07
TCONS_00061147	TCONS_00309503	-0.769549	5.5264e-08
TCONS_00061147	TCONS_00334774	0.753667	1.03538e-07
TCONS_00067147	TCONS_00023288	0.775059	4.27488e-08
TCONS_00067147	TCONS_00051931	0.743619	1.47957e-07
TCONS_00067147	TCONS_00051933	0.762094	7.53231e-08
TCONS_00067147	TCONS_00057291	0.735678	1.95109e-07
TCONS_00067147	TCONS_00060422	0.811036	0
TCONS_00067147	TCONS_00094509	0.706345	5.68497e-07
TCONS_00067147	TCONS_00099650	0.730168	2.36646e-07
TCONS_00067147	TCONS_00099951	0.78851	1.86211e-08
TCONS_00067147	TCONS_00099953	0.786403	2.18783e-08
TCONS_00067147	TCONS_00103202	0.715096	4.08018e-07
TCONS_00067147	TCONS_00114962	0.817357	0
TCONS_00067147	TCONS_00114966	0.739567	1.70395e-07
TCONS_00067147	TCONS_00125346	-0.712179	4.55113e-07
TCONS_00067147	TCONS_00133315	0.7044	6.12958e-07
TCONS_00067147	TCONS_00139871	0.737785	1.81302e-07
TCONS_00067147	TCONS_00139883	0.716068	3.93545e-07
TCONS_00067147	TCONS_00183613	0.706021	5.75654e-07
TCONS_00067147	TCONS_00183616	0.723847	2.96294e-07
TCONS_00067147	TCONS_00198776	0.743295	1.49641e-07
TCONS_00067147	TCONS_00208625	0.717203	3.77376e-07
TCONS_00067147	TCONS_00235169	-0.748481	1.24714e-07
TCONS_00067147	TCONS_00235170	-0.724496	2.89478e-07
TCONS_00067147	TCONS_00235180	0.738919	1.74283e-07
TCONS_00067147	TCONS_00235208	0.739729	1.69437e-07
TCONS_00067147	TCONS_00288633	0.715258	4.05565e-07
TCONS_00068683	TCONS_00001903	0.770035	5.40873e-08
TCONS_00068683	TCONS_00015094	-0.705696	5.82911e-07
TCONS_00068683	TCONS_00119220	-0.700835	7.04692e-07
TCONS_00068683	TCONS_00156124	0.744753	1.42201e-07
TCONS_00068683	TCONS_00192743	0.754153	1.01718e-07
TCONS_00068683	TCONS_00208389	0.748157	1.26153e-07
TCONS_00068683	TCONS_00208393	0.761932	7.58052e-08
TCONS_00068683	TCONS_00208398	0.763552	7.10786e-08
TCONS_00068683	TCONS_00208627	-0.726927	2.6541e-07
TCONS_00068683	TCONS_00208629	-0.729033	2.4631e-07
TCONS_00068683	TCONS_00252281	-0.717203	3.77376e-07
TCONS_00068683	TCONS_00269111	-0.712179	4.55113e-07
TCONS_00068683	TCONS_00291739	0.718499	3.59797e-07
TCONS_00073835	TCONS_00053042	0.723523	2.99768e-07
TCONS_00074059	TCONS_00053050	0.74135	1.60142e-07
TCONS_00074059	TCONS_00236503	0.702617	6.5708e-07
TCONS_00074061	TCONS_00015094	-0.822543	0
TCONS_00074061	TCONS_00053042	0.774897	4.30924e-08
TCONS_00074061	TCONS_00053050	0.70521	5.93985e-07
TCONS_00074061	TCONS_00069584	0.784944	2.42384e-08
TCONS_00074061	TCONS_00081605	-0.71542	4.03129e-07
TCONS_00074061	TCONS_00083981	-0.728223	2.53474e-07
TCONS_00074061	TCONS_00117112	0.732923	2.14822e-07
TCONS_00074061	TCONS_00117128	0.730816	2.31306e-07
TCONS_00074061	TCONS_00125968	0.760311	8.07459e-08
TCONS_00074061	TCONS_00147258	0.75626	9.41228e-08
TCONS_00074061	TCONS_00192743	0.773276	4.66069e-08
TCONS_00074061	TCONS_00207511	0.719796	3.43123e-07
TCONS_00074061	TCONS_00207513	0.777166	3.84081e-08
TCONS_00074061	TCONS_00208389	0.818491	0
TCONS_00074061	TCONS_00208393	0.774735	4.34374e-08
TCONS_00074061	TCONS_00208398	0.80974	0
TCONS_00074061	TCONS_00208629	-0.717527	3.72894e-07
TCONS_00074061	TCONS_00224424	0.712179	4.55113e-07
TCONS_00074061	TCONS_00257284	0.705534	5.86577e-07
TCONS_00074061	TCONS_00269111	-0.744591	1.4301e-07
TCONS_00074061	TCONS_00272192	-0.775545	4.17265e-08
TCONS_00074061	TCONS_00291739	0.782027	2.9229e-08
TCONS_00074837	TCONS_00007692	-0.741188	1.61048e-07
TCONS_00074837	TCONS_00015094	-0.750912	1.1437e-07
TCONS_00074837	TCONS_00048123	0.74605	1.3588e-07
TCONS_00074837	TCONS_00053042	0.718175	3.64105e-07
TCONS_00074837	TCONS_00060556	-0.739081	1.73303e-07
TCONS_00074837	TCONS_00083960	0.705372	5.90268e-07
TCONS_00074837	TCONS_00083981	-0.73503	1.99571e-07
TCONS_00074837	TCONS_00084219	0.715096	4.08018e-07
TCONS_00074837	TCONS_00117112	0.77279	4.76898e-08
TCONS_00074837	TCONS_00117128	0.727737	2.5788e-07
TCONS_00074837	TCONS_00117134	0.773438	4.62489e-08
TCONS_00074837	TCONS_00133285	0.703428	6.36609e-07
TCONS_00074837	TCONS_00133302	0.705859	5.7927e-07
TCONS_00074837	TCONS_00133304	-0.734057	2.06464e-07
TCONS_00074837	TCONS_00133315	0.722227	3.14119e-07
TCONS_00074837	TCONS_00143810	0.727899	2.56403e-07
TCONS_00074837	TCONS_00147258	0.727899	2.56403e-07
TCONS_00074837	TCONS_00168196	-0.734057	2.06464e-07
TCONS_00074837	TCONS_00192743	0.823677	0
TCONS_00074837	TCONS_00208389	0.805688	0
TCONS_00074837	TCONS_00208393	0.714448	4.17995e-07
TCONS_00074837	TCONS_00208398	0.75626	9.41228e-08
TCONS_00074837	TCONS_00208627	-0.704562	6.09111e-07
TCONS_00074837	TCONS_00224424	0.725468	2.79576e-07
TCONS_00074837	TCONS_00234888	0.701645	6.826e-07
TCONS_00074837	TCONS_00269111	-0.700997	7.00213e-07
TCONS_00074837	TCONS_00272192	-0.764039	6.97006e-08
TCONS_00074837	TCONS_00291739	0.819788	0
TCONS_00074837	TCONS_00309589	0.737623	1.82328e-07
TCONS_00074837	TCONS_00332250	0.702455	6.6126e-07
TCONS_00075062	TCONS_00048105	0.771331	5.10204e-08
TCONS_00075062	TCONS_00048119	0.755773	9.58344e-08
TCONS_00075062	TCONS_00048123	0.770035	5.40873e-08
TCONS_00075062	TCONS_00053042	0.7877	1.98531e-08
TCONS_00075062	TCONS_00060556	-0.706669	5.61438e-07
TCONS_00075062	TCONS_00079848	0.700348	7.1832e-07
TCONS_00075062	TCONS_00079874	0.716879	3.81919e-07
TCONS_00075062	TCONS_00083960	0.74686	1.32061e-07
TCONS_00075062	TCONS_00089558	-0.730006	2.38001e-07
TCONS_00075062	TCONS_00103485	0.780083	3.27663e-08
TCONS_00075062	TCONS_00105505	0.7689	5.68563e-08
TCONS_00075062	TCONS_00117112	0.797909	6.09265e-09
TCONS_00075062	TCONS_00117121	0.70521	5.93985e-07
TCONS_00075062	TCONS_00117128	0.765497	6.56725e-08
TCONS_00075062	TCONS_00117132	0.726927	2.6541e-07
TCONS_00075062	TCONS_00117134	0.787375	2.03531e-08
TCONS_00075062	TCONS_00125968	0.765497	6.56725e-08
TCONS_00075062	TCONS_00133304	-0.766956	6.17974e-08
TCONS_00075062	TCONS_00133305	-0.728871	2.47725e-07
TCONS_00075062	TCONS_00133315	0.705372	5.90268e-07
TCONS_00075062	TCONS_00143822	0.763066	7.24749e-08
TCONS_00075062	TCONS_00147258	0.769062	5.64557e-08
TCONS_00075062	TCONS_00156124	0.749453	1.20482e-07
TCONS_00075062	TCONS_00168196	-0.78851	1.86211e-08
TCONS_00075062	TCONS_00174107	0.737623	1.82328e-07
TCONS_00075062	TCONS_00176325	0.727089	2.63886e-07
TCONS_00075062	TCONS_00192743	0.924155	0
TCONS_00075062	TCONS_00208386	0.749453	1.20482e-07
TCONS_00075062	TCONS_00208389	0.888016	0
TCONS_00075062	TCONS_00208393	0.712017	4.57901e-07
TCONS_00075062	TCONS_00208398	0.866461	0
TCONS_00075062	TCONS_00208627	-0.797747	6.28287e-09
TCONS_00075062	TCONS_00224414	0.738433	1.77257e-07
TCONS_00075062	TCONS_00224424	0.714772	4.12973e-07
TCONS_00075062	TCONS_00269111	-0.705372	5.90268e-07
TCONS_00075062	TCONS_00272192	-0.766469	6.30726e-08
TCONS_00075062	TCONS_00284644	0.733409	2.11197e-07
TCONS_00075062	TCONS_00291739	0.851228	0
TCONS_00075080	TCONS_00015094	-0.740864	1.62876e-07
TCONS_00075080	TCONS_00048119	0.721416	3.23474e-07
TCONS_00075080	TCONS_00048123	0.761446	7.72644e-08
TCONS_00075080	TCONS_00053042	0.757556	8.96739e-08
TCONS_00075080	TCONS_00060556	-0.723199	3.03287e-07
TCONS_00075080	TCONS_00083960	0.776355	4.00503e-08
TCONS_00075080	TCONS_00103485	0.744429	1.43824e-07
TCONS_00075080	TCONS_00105505	0.732599	2.17275e-07
TCONS_00075080	TCONS_00117112	0.808119	0
TCONS_00075080	TCONS_00117128	0.755611	9.64103e-08
TCONS_00075080	TCONS_00117134	0.76809	5.88846e-08
TCONS_00075080	TCONS_00125968	0.7783	3.61647e-08
TCONS_00075080	TCONS_00133285	0.71461	4.15476e-07
TCONS_00075080	TCONS_00133302	0.732112	2.21009e-07
TCONS_00075080	TCONS_00133304	-0.75237	1.08524e-07
TCONS_00075080	TCONS_00133315	0.741512	1.5924e-07
TCONS_00075080	TCONS_00133319	0.700997	7.00213e-07
TCONS_00075080	TCONS_00143810	0.734705	2.01842e-07
TCONS_00075080	TCONS_00143822	0.757394	9.0221e-08
TCONS_00075080	TCONS_00147258	0.818329	0
TCONS_00075080	TCONS_00168196	-0.768414	5.80682e-08
TCONS_00075080	TCONS_00174107	0.701969	6.73976e-07
TCONS_00075080	TCONS_00189589	-0.716068	3.93545e-07
TCONS_00075080	TCONS_00192743	0.894336	0
TCONS_00075080	TCONS_00208386	0.795641	8.83449e-09
TCONS_00075080	TCONS_00208389	0.855603	0
TCONS_00075080	TCONS_00208393	0.737947	1.80282e-07
TCONS_00075080	TCONS_00208398	0.882668	0
TCONS_00075080	TCONS_00208627	-0.741512	1.5924e-07
TCONS_00075080	TCONS_00224414	0.715906	3.95917e-07
TCONS_00075080	TCONS_00224424	0.717527	3.72894e-07
TCONS_00075080	TCONS_00234888	0.722227	3.14119e-07
TCONS_00075080	TCONS_00269111	-0.734057	2.06464e-07
TCONS_00075080	TCONS_00272192	-0.775707	4.13885e-08
TCONS_00075080	TCONS_00291739	0.837777	0
TCONS_00078382	TCONS_00174107	0.706831	5.57944e-07
TCONS_00079526	TCONS_00007692	-0.754801	9.9331e-08
TCONS_00079526	TCONS_00015094	-0.734543	2.02987e-07
TCONS_00079526	TCONS_00023288	0.760149	8.12522e-08
TCONS_00079526	TCONS_00048123	0.709424	5.05191e-07
TCONS_00079526	TCONS_00053050	0.792399	1.30553e-08
TCONS_00079526	TCONS_00060553	0.706507	5.64955e-07
TCONS_00079526	TCONS_00069584	0.87813	0
TCONS_00079526	TCONS_00071233	0.709586	5.02081e-07
TCONS_00079526	TCONS_00094509	0.748805	1.23289e-07
TCONS_00079526	TCONS_00094523	0.730168	2.36646e-07
TCONS_00079526	TCONS_00133302	0.739567	1.70395e-07
TCONS_00079526	TCONS_00133304	-0.709262	5.08321e-07
TCONS_00079526	TCONS_00133315	0.759015	8.48613e-08
TCONS_00079526	TCONS_00147258	0.707641	5.40833e-07
TCONS_00079526	TCONS_00172402	0.754315	1.01117e-07
TCONS_00079526	TCONS_00208393	0.790779	1.53059e-08
TCONS_00079526	TCONS_00235215	0.739405	1.71359e-07
TCONS_00079526	TCONS_00236503	0.7044	6.12958e-07
TCONS_00079526	TCONS_00257289	0.739243	1.72328e-07
TCONS_00079526	TCONS_00258275	0.700835	7.04692e-07
TCONS_00079526	TCONS_00272192	-0.74054	1.64725e-07
TCONS_00079526	TCONS_00291723	0.765983	6.43642e-08
TCONS_00079526	TCONS_00291739	0.718499	3.59797e-07
TCONS_00079526	TCONS_00309503	-0.70359	6.32598e-07
TCONS_00079526	TCONS_00334774	0.743781	1.47121e-07
TCONS_00089243	TCONS_00007692	-0.731302	2.27386e-07
TCONS_00089243	TCONS_00048123	0.744267	1.44641e-07
TCONS_00089243	TCONS_00053042	0.850255	0
TCONS_00089243	TCONS_00053050	0.747832	1.27608e-07
TCONS_00089243	TCONS_00069584	0.841342	0
TCONS_00089243	TCONS_00071233	0.824974	0
TCONS_00089243	TCONS_00083960	0.744915	1.41396e-07
TCONS_00089243	TCONS_00094523	0.758691	8.59137e-08
TCONS_00089243	TCONS_00117134	0.747022	1.31309e-07
TCONS_00089243	TCONS_00125968	0.72012	3.39089e-07
TCONS_00089243	TCONS_00133304	-0.715096	4.08018e-07
TCONS_00089243	TCONS_00133315	0.722551	3.10462e-07
TCONS_00089243	TCONS_00143809	0.769062	5.64557e-08
TCONS_00089243	TCONS_00143822	0.739081	1.73303e-07
TCONS_00089243	TCONS_00147258	0.723037	3.05063e-07
TCONS_00089243	TCONS_00168196	-0.741998	1.56565e-07
TCONS_00089243	TCONS_00192743	0.799206	4.60136e-09
TCONS_00089243	TCONS_00207513	0.718499	3.59797e-07
TCONS_00089243	TCONS_00208386	0.722551	3.10462e-07
TCONS_00089243	TCONS_00208389	0.783648	2.6411e-08
TCONS_00089243	TCONS_00208398	0.774086	4.48316e-08
TCONS_00089243	TCONS_00208627	-0.713962	4.25657e-07
TCONS_00089243	TCONS_00236503	0.720282	3.37092e-07
TCONS_00089243	TCONS_00272192	-0.79872	5.15428e-09
TCONS_00089243	TCONS_00291739	0.823353	0
TCONS_00089243	TCONS_00309503	-0.732599	2.17275e-07
TCONS_00090950	TCONS_00043942	-0.752694	1.07259e-07
TCONS_00090950	TCONS_00156124	0.734705	2.01842e-07
TCONS_00090950	TCONS_00208627	-0.712341	4.52344e-07
TCONS_00091429	TCONS_00143822	0.747508	1.29077e-07
TCONS_00091429	TCONS_00291739	0.704562	6.09111e-07
TCONS_00092475	TCONS_00007692	-0.792561	1.28355e-08
TCONS_00092475	TCONS_00043942	-0.731302	2.27386e-07
TCONS_00092475	TCONS_00048119	0.730816	2.31306e-07
TCONS_00092475	TCONS_00060553	0.716717	3.84213e-07
TCONS_00092475	TCONS_00117134	0.784458	2.50448e-08
TCONS_00092475	TCONS_00133302	0.703266	6.40646e-07
TCONS_00092475	TCONS_00133304	-0.711369	4.69245e-07
TCONS_00092475	TCONS_00160837	0.706345	5.68497e-07
TCONS_00092475	TCONS_00172402	0.712665	4.46861e-07
TCONS_00092475	TCONS_00183612	0.718823	3.55545e-07
TCONS_00092475	TCONS_00208386	0.83178	0
TCONS_00092475	TCONS_00208393	0.733085	2.13606e-07
TCONS_00092475	TCONS_00208398	0.746374	1.3434e-07
TCONS_00092475	TCONS_00272192	-0.748967	1.22582e-07
TCONS_00092475	TCONS_00309589	0.706669	5.61438e-07
TCONS_00094725	TCONS_00189576	0.71461	4.15476e-07
TCONS_00097784	TCONS_00117112	0.741026	1.6196e-07
TCONS_00097784	TCONS_00192743	0.759177	8.43387e-08
TCONS_00099065	TCONS_00236503	0.721903	3.17825e-07
TCONS_00099066	TCONS_00001904	0.743943	1.4629e-07
TCONS_00099066	TCONS_00007692	-0.743781	1.47121e-07
TCONS_00099066	TCONS_00015094	-0.766956	6.17974e-08
TCONS_00099066	TCONS_00119220	-0.707479	5.44208e-07
TCONS_00099066	TCONS_00208393	0.769549	5.5264e-08
TCONS_00099066	TCONS_00208627	-0.701807	6.78273e-07
TCONS_00099066	TCONS_00309589	0.724658	2.87802e-07
TCONS_00099066	TCONS_00334774	0.715906	3.95917e-07
TCONS_00100579	TCONS_00172407	-0.713475	4.33474e-07
TCONS_00100736	TCONS_00097189	0.765821	6.47984e-08
TCONS_00100736	TCONS_00097197	0.717365	3.75128e-07
TCONS_00100824	TCONS_00001904	0.706993	5.54475e-07
TCONS_00100824	TCONS_00015094	-0.702779	6.52929e-07
TCONS_00103185	TCONS_00053042	0.72563	2.77962e-07
TCONS_00103185	TCONS_00143813	0.705354	1.82889e-07
TCONS_00103185	TCONS_00143822	0.777328	3.80837e-08
TCONS_00103185	TCONS_00168196	-0.741026	1.6196e-07
TCONS_00103185	TCONS_00189589	-0.718337	3.61944e-07
TCONS_00103185	TCONS_00192743	0.781865	2.95172e-08
TCONS_00103185	TCONS_00208389	0.726764	2.66945e-07
TCONS_00103185	TCONS_00291739	0.725306	2.812e-07
TCONS_00103190	TCONS_00310511	0.73584	1.9401e-07
TCONS_00104352	TCONS_00053042	0.769873	5.44779e-08
TCONS_00104352	TCONS_00053050	0.711369	4.69245e-07
TCONS_00104352	TCONS_00133304	-0.708938	5.14646e-07
TCONS_00104352	TCONS_00156124	0.702779	6.52929e-07
TCONS_00104352	TCONS_00192743	0.734057	2.06464e-07
TCONS_00104352	TCONS_00207509	0.762418	7.43653e-08
TCONS_00104352	TCONS_00208389	0.754315	1.01117e-07
TCONS_00104352	TCONS_00208398	0.721903	3.17825e-07
TCONS_00104352	TCONS_00208627	-0.71072	4.80902e-07
TCONS_00104352	TCONS_00224414	0.720444	3.35108e-07
TCONS_00104352	TCONS_00272192	-0.724171	2.92864e-07
TCONS_00104352	TCONS_00291739	0.716393	3.88848e-07
TCONS_00104711	TCONS_00119220	-0.739405	1.71359e-07
TCONS_00104747	TCONS_00079848	0.703914	6.24661e-07
TCONS_00104747	TCONS_00168196	-0.72644	2.70043e-07
TCONS_00104747	TCONS_00192743	0.75075	1.15035e-07
TCONS_00104747	TCONS_00291739	0.723685	2.98025e-07
TCONS_00104942	TCONS_00097189	0.740053	1.67536e-07
TCONS_00104942	TCONS_00147258	0.747508	1.29077e-07
TCONS_00104942	TCONS_00189589	-0.715258	4.05565e-07
TCONS_00104942	TCONS_00192743	0.722227	3.14119e-07
TCONS_00104942	TCONS_00208389	0.726927	2.6541e-07
TCONS_00104942	TCONS_00257289	0.774086	4.48316e-08
TCONS_00105005	TCONS_00105505	0.740216	1.66594e-07
TCONS_00105005	TCONS_00156124	0.71461	4.15476e-07
TCONS_00105005	TCONS_00192743	0.743133	1.5049e-07
TCONS_00105005	TCONS_00208389	0.717203	3.77376e-07
TCONS_00105005	TCONS_00208398	0.776841	3.9061e-08
TCONS_00109768	TCONS_00001903	0.72557	5.44417e-08
TCONS_00109915	TCONS_00208389	0.741674	1.58343e-07
TCONS_00110241	TCONS_00053042	0.734219	2.05298e-07
TCONS_00110241	TCONS_00168196	-0.736002	1.92917e-07
TCONS_00110241	TCONS_00291739	0.700997	7.00213e-07
TCONS_00110442	TCONS_00165207	-0.700835	7.04692e-07
TCONS_00110902	TCONS_00048123	0.720768	3.31179e-07
TCONS_00110902	TCONS_00053042	0.735516	1.96215e-07
TCONS_00110902	TCONS_00079848	0.71072	4.80902e-07
TCONS_00110902	TCONS_00125968	0.71461	4.15476e-07
TCONS_00110902	TCONS_00147258	0.730168	2.36646e-07
TCONS_00110902	TCONS_00168196	-0.837128	0
TCONS_00110902	TCONS_00189589	-0.768252	5.84755e-08
TCONS_00110902	TCONS_00192743	0.799692	4.05594e-09
TCONS_00110902	TCONS_00208389	0.790455	1.57676e-08
TCONS_00110902	TCONS_00208627	-0.73195	2.22269e-07
TCONS_00110902	TCONS_00272192	-0.73503	1.99571e-07
TCONS_00110902	TCONS_00291739	0.833077	0
TCONS_00110935	TCONS_00053042	0.739567	1.70395e-07
TCONS_00111107	TCONS_00119220	-0.701159	6.95764e-07
TCONS_00111107	TCONS_00207506	0.725954	2.74764e-07
TCONS_00115350	TCONS_00015094	-0.706345	5.68497e-07
TCONS_00115350	TCONS_00057290	0.704886	6.01496e-07
TCONS_00115350	TCONS_00269111	-0.717203	3.77376e-07
TCONS_00116794	TCONS_00048105	0.75788	8.85872e-08
TCONS_00116794	TCONS_00117132	0.738271	1.7826e-07
TCONS_00116896	TCONS_00015094	-0.709424	5.05191e-07
TCONS_00116896	TCONS_00043942	-0.758204	8.75104e-08
TCONS_00116898	TCONS_00117128	0.706831	5.57944e-07
TCONS_00116898	TCONS_00117134	0.734381	2.04139e-07
TCONS_00116898	TCONS_00332250	0.708289	5.2756e-07
TCONS_00116991	TCONS_00048119	0.727413	2.60864e-07
TCONS_00116991	TCONS_00048123	0.715258	4.05565e-07
TCONS_00116991	TCONS_00079874	0.702293	6.6547e-07
TCONS_00116991	TCONS_00127017	0.701321	6.91345e-07
TCONS_00116991	TCONS_00133302	0.759015	8.48613e-08
TCONS_00116991	TCONS_00133304	-0.72482	2.86135e-07
TCONS_00116991	TCONS_00133315	0.708614	5.21059e-07
TCONS_00116991	TCONS_00143810	0.733571	2.10003e-07
TCONS_00116991	TCONS_00168196	-0.712017	4.57901e-07
TCONS_00116991	TCONS_00208393	0.719634	3.45159e-07
TCONS_00116991	TCONS_00208398	0.71072	4.80902e-07
TCONS_00116991	TCONS_00208627	-0.7044	6.12958e-07
TCONS_00116991	TCONS_00224414	0.73195	2.22269e-07
TCONS_00117055	TCONS_00235178	-0.711531	4.6638e-07
TCONS_00117331	TCONS_00007692	-0.786079	2.23952e-08
TCONS_00117331	TCONS_00010809	0.703752	6.28616e-07
TCONS_00117331	TCONS_00015094	-0.722389	3.12285e-07
TCONS_00117331	TCONS_00048119	0.720444	3.35108e-07
TCONS_00117331	TCONS_00051525	0.71931	3.49273e-07
TCONS_00117331	TCONS_00051933	0.713475	4.33474e-07
TCONS_00117331	TCONS_00057290	0.776355	4.00503e-08
TCONS_00117331	TCONS_00060422	0.753343	1.04767e-07
TCONS_00117331	TCONS_00060556	-0.701969	6.73976e-07
TCONS_00117331	TCONS_00097174	0.738595	1.7626e-07
TCONS_00117331	TCONS_00099640	0.73195	2.22269e-07
TCONS_00117331	TCONS_00099650	0.702779	6.52929e-07
TCONS_00117331	TCONS_00099951	0.718337	3.61944e-07
TCONS_00117331	TCONS_00099953	0.751884	1.10444e-07
TCONS_00117331	TCONS_00103194	0.723199	3.03287e-07
TCONS_00117331	TCONS_00103203	0.754021	8.16438e-09
TCONS_00117331	TCONS_00103205	0.712704	1.19125e-07
TCONS_00117331	TCONS_00117134	0.755611	9.64103e-08
TCONS_00117331	TCONS_00133284	0.808443	0
TCONS_00117331	TCONS_00133285	0.90957	0
TCONS_00117331	TCONS_00133302	0.855117	0
TCONS_00117331	TCONS_00133304	-0.718661	3.57664e-07
TCONS_00117331	TCONS_00133307	0.787213	2.06047e-08
TCONS_00117331	TCONS_00133315	0.865489	0
TCONS_00117331	TCONS_00133316	0.708938	5.14646e-07
TCONS_00117331	TCONS_00133319	0.847824	0
TCONS_00117331	TCONS_00143809	0.723199	3.03287e-07
TCONS_00117331	TCONS_00143810	0.718823	3.55545e-07
TCONS_00117331	TCONS_00147258	0.854955	0
TCONS_00117331	TCONS_00159751	0.776841	3.9061e-08
TCONS_00117331	TCONS_00176209	0.787537	2.01026e-08
TCONS_00117331	TCONS_00176210	0.765983	6.43642e-08
TCONS_00117331	TCONS_00178541	0.793696	1.1323e-08
TCONS_00117331	TCONS_00183612	0.78932	1.74147e-08
TCONS_00117331	TCONS_00192743	0.706345	5.68497e-07
TCONS_00117331	TCONS_00198779	0.74605	1.3588e-07
TCONS_00117331	TCONS_00208386	0.723199	3.03287e-07
TCONS_00117331	TCONS_00228083	0.732761	2.16045e-07
TCONS_00117331	TCONS_00234888	0.759663	8.2785e-08
TCONS_00117331	TCONS_00258275	0.710234	4.89855e-07
TCONS_00117331	TCONS_00272192	-0.713151	4.38775e-07
TCONS_00117331	TCONS_00291739	0.744591	1.4301e-07
TCONS_00117331	TCONS_00309589	0.732599	2.17275e-07
TCONS_00117384	TCONS_00043948	-0.705859	5.7927e-07
TCONS_00117384	TCONS_00048123	0.741674	1.58343e-07
TCONS_00117384	TCONS_00053042	0.786241	2.21363e-08
TCONS_00117384	TCONS_00089558	-0.737298	1.84397e-07
TCONS_00117384	TCONS_00117112	0.831942	0
TCONS_00117384	TCONS_00117134	0.730816	2.31306e-07
TCONS_00117384	TCONS_00125968	0.705048	5.97727e-07
TCONS_00117384	TCONS_00133285	0.724658	2.87802e-07
TCONS_00117384	TCONS_00133319	0.712827	4.44147e-07
TCONS_00117384	TCONS_00143822	0.801151	2.46406e-09
TCONS_00117384	TCONS_00147258	0.7877	1.98531e-08
TCONS_00117384	TCONS_00168196	-0.750263	1.17053e-07
TCONS_00117384	TCONS_00192743	0.781379	3.03889e-08
TCONS_00117384	TCONS_00208389	0.754315	1.01117e-07
TCONS_00117384	TCONS_00208398	0.700186	7.22926e-07
TCONS_00117384	TCONS_00208627	-0.777976	3.67991e-08
TCONS_00117384	TCONS_00224414	0.714286	4.20532e-07
TCONS_00117384	TCONS_00291739	0.803095	4.42794e-10
TCONS_00117397	TCONS_00125968	0.717041	3.7964e-07
TCONS_00117750	TCONS_00053042	0.779434	3.39845e-08
TCONS_00117750	TCONS_00071233	0.780083	3.27663e-08
TCONS_00117750	TCONS_00156124	0.782838	2.78056e-08
TCONS_00117750	TCONS_00165584	0.7091	5.11473e-07
TCONS_00117750	TCONS_00176325	0.719634	3.45159e-07
TCONS_00117750	TCONS_00192743	0.75237	1.08524e-07
TCONS_00117750	TCONS_00207509	0.706669	5.61438e-07
TCONS_00117750	TCONS_00207511	0.705372	5.90268e-07
TCONS_00117750	TCONS_00208389	0.775221	4.24066e-08
TCONS_00117750	TCONS_00208398	0.739243	1.72328e-07
TCONS_00117846	TCONS_00007692	-0.784296	2.53158e-08
TCONS_00117846	TCONS_00015094	-0.709586	5.02081e-07
TCONS_00117846	TCONS_00048105	0.717527	3.72894e-07
TCONS_00117846	TCONS_00048119	0.750263	1.17053e-07
TCONS_00117846	TCONS_00048123	0.837939	0
TCONS_00117846	TCONS_00051525	0.710396	4.8685e-07
TCONS_00117846	TCONS_00053042	0.786079	2.23952e-08
TCONS_00117846	TCONS_00060556	-0.74135	1.60142e-07
TCONS_00117846	TCONS_00071233	0.747508	1.29077e-07
TCONS_00117846	TCONS_00079874	0.736164	1.9183e-07
TCONS_00117846	TCONS_00083960	0.803906	0
TCONS_00117846	TCONS_00089558	-0.760149	8.12522e-08
TCONS_00117846	TCONS_00103485	0.72644	2.70043e-07
TCONS_00117846	TCONS_00105505	0.737136	1.85441e-07
TCONS_00117846	TCONS_00117112	0.785593	2.31787e-08
TCONS_00117846	TCONS_00117128	0.766469	6.30726e-08
TCONS_00117846	TCONS_00117132	0.701321	6.91345e-07
TCONS_00117846	TCONS_00117134	0.850417	0
TCONS_00117846	TCONS_00125968	0.766145	6.39318e-08
TCONS_00117846	TCONS_00133285	0.743781	1.47121e-07
TCONS_00117846	TCONS_00133302	0.738433	1.77257e-07
TCONS_00117846	TCONS_00133304	-0.804554	0
TCONS_00117846	TCONS_00133305	-0.706669	5.61438e-07
TCONS_00117846	TCONS_00133315	0.77198	4.95248e-08
TCONS_00117846	TCONS_00143810	0.710072	4.9288e-07
TCONS_00117846	TCONS_00143822	0.792886	1.23987e-08
TCONS_00117846	TCONS_00147258	0.788834	1.81355e-08
TCONS_00117846	TCONS_00168196	-0.784782	2.45061e-08
TCONS_00117846	TCONS_00192743	0.900332	0
TCONS_00117846	TCONS_00208386	0.838587	0
TCONS_00117846	TCONS_00208389	0.842314	0
TCONS_00117846	TCONS_00208393	0.74767	1.2834e-07
TCONS_00117846	TCONS_00208398	0.822867	0
TCONS_00117846	TCONS_00208627	-0.793048	1.21817e-08
TCONS_00117846	TCONS_00208629	-0.701159	6.95764e-07
TCONS_00117846	TCONS_00224414	0.743295	1.49641e-07
TCONS_00117846	TCONS_00224424	0.721416	3.23474e-07
TCONS_00117846	TCONS_00269111	-0.73503	1.99571e-07
TCONS_00117846	TCONS_00272192	-0.780407	3.21646e-08
TCONS_00117846	TCONS_00284644	0.727737	2.5788e-07
TCONS_00117846	TCONS_00291739	0.8475	0
TCONS_00117846	TCONS_00307434	0.732761	2.16045e-07
TCONS_00117846	TCONS_00309503	-0.746212	1.35108e-07
TCONS_00117846	TCONS_00309589	0.819302	0
TCONS_00117846	TCONS_00334774	0.749777	1.191e-07
TCONS_00118327	TCONS_00007692	-0.758042	8.80475e-08
TCONS_00118327	TCONS_00015094	-0.771169	5.13982e-08
TCONS_00118327	TCONS_00023288	0.707641	5.40833e-07
TCONS_00118327	TCONS_00035898	-0.712017	4.57901e-07
TCONS_00118327	TCONS_00048119	0.70359	6.32598e-07
TCONS_00118327	TCONS_00048123	0.705859	5.7927e-07
TCONS_00118327	TCONS_00051931	0.722875	3.06851e-07
TCONS_00118327	TCONS_00051933	0.713151	4.38775e-07
TCONS_00118327	TCONS_00053042	0.800827	2.81212e-09
TCONS_00118327	TCONS_00053050	0.74605	1.3588e-07
TCONS_00118327	TCONS_00069584	0.824812	0
TCONS_00118327	TCONS_00071233	0.750587	1.15705e-07
TCONS_00118327	TCONS_00083960	0.714448	4.17995e-07
TCONS_00118327	TCONS_00094509	0.711369	4.69245e-07
TCONS_00118327	TCONS_00094523	0.701321	6.91345e-07
TCONS_00118327	TCONS_00097174	0.746536	1.33577e-07
TCONS_00118327	TCONS_00099953	0.724982	2.8448e-07
TCONS_00118327	TCONS_00117112	0.700673	7.09203e-07
TCONS_00118327	TCONS_00117134	0.767604	6.01224e-08
TCONS_00118327	TCONS_00133284	0.727089	2.63886e-07
TCONS_00118327	TCONS_00133285	0.795154	9.44444e-09
TCONS_00118327	TCONS_00133302	0.73033	2.35298e-07
TCONS_00118327	TCONS_00133304	-0.745402	1.39007e-07
TCONS_00118327	TCONS_00133307	0.766956	6.17974e-08
TCONS_00118327	TCONS_00133315	0.811847	0
TCONS_00118327	TCONS_00133319	0.736974	1.8649e-07
TCONS_00118327	TCONS_00143809	0.716068	3.93545e-07
TCONS_00118327	TCONS_00143822	0.72482	2.86135e-07
TCONS_00118327	TCONS_00147258	0.864517	0
TCONS_00118327	TCONS_00168196	-0.703103	6.44712e-07
TCONS_00118327	TCONS_00176210	0.7138	4.28245e-07
TCONS_00118327	TCONS_00178541	0.7783	3.61647e-08
TCONS_00118327	TCONS_00189576	0.751236	1.13048e-07
TCONS_00118327	TCONS_00192743	0.813143	0
TCONS_00118327	TCONS_00198779	0.725468	2.79576e-07
TCONS_00118327	TCONS_00207513	0.718175	3.64105e-07
TCONS_00118327	TCONS_00208389	0.823677	0
TCONS_00118327	TCONS_00208393	0.70521	5.93985e-07
TCONS_00118327	TCONS_00208398	0.822381	0
TCONS_00118327	TCONS_00208629	-0.727251	2.6237e-07
TCONS_00118327	TCONS_00224424	0.740702	1.63798e-07
TCONS_00118327	TCONS_00228083	0.768738	5.72585e-08
TCONS_00118327	TCONS_00257284	0.743619	1.47957e-07
TCONS_00118327	TCONS_00258275	0.7689	5.68563e-08
TCONS_00118327	TCONS_00269111	-0.721903	3.17825e-07
TCONS_00118327	TCONS_00272192	-0.831456	0
TCONS_00118327	TCONS_00291723	0.724334	2.91166e-07
TCONS_00118327	TCONS_00291739	0.831132	0
TCONS_00118327	TCONS_00309503	-0.73584	1.9401e-07
TCONS_00118327	TCONS_00334774	0.716555	3.86523e-07
TCONS_00118512	TCONS_00060556	-0.742322	1.54806e-07
TCONS_00118512	TCONS_00103479	-0.713475	4.33474e-07
TCONS_00118512	TCONS_00133304	-0.721903	3.17825e-07
TCONS_00118512	TCONS_00208627	-0.792561	1.28355e-08
TCONS_00118512	TCONS_00291739	0.737785	1.81302e-07
TCONS_00119185	TCONS_00064932	0.702455	6.6126e-07
TCONS_00119185	TCONS_00207511	0.70051	7.13746e-07
TCONS_00119730	TCONS_00035893	0.738757	1.75269e-07
TCONS_00120373	TCONS_00043948	-0.709586	5.02081e-07
TCONS_00120373	TCONS_00069584	0.704238	6.16832e-07
TCONS_00120373	TCONS_00094523	0.726927	2.6541e-07
TCONS_00120373	TCONS_00133285	0.70051	7.13746e-07
TCONS_00120373	TCONS_00147258	0.726278	2.71607e-07
TCONS_00120399	TCONS_00117112	0.721903	3.17825e-07
TCONS_00120399	TCONS_00192743	0.71623	3.91188e-07
TCONS_00122554	TCONS_00015094	-0.7689	5.68563e-08
TCONS_00122554	TCONS_00048119	0.723361	3.01521e-07
TCONS_00122554	TCONS_00060586	0.717851	3.6847e-07
TCONS_00122554	TCONS_00103485	0.743943	1.4629e-07
TCONS_00122554	TCONS_00117112	0.737298	1.84397e-07
TCONS_00122554	TCONS_00117128	0.752046	1.09801e-07
TCONS_00122554	TCONS_00117134	0.714124	4.23086e-07
TCONS_00122554	TCONS_00189589	-0.706507	5.64955e-07
TCONS_00122554	TCONS_00192743	0.710396	4.8685e-07
TCONS_00122554	TCONS_00208389	0.772304	4.87862e-08
TCONS_00122554	TCONS_00208398	0.769225	5.60568e-08
TCONS_00122554	TCONS_00208627	-0.741512	1.5924e-07
TCONS_00122554	TCONS_00272192	-0.725954	2.74764e-07
TCONS_00122554	TCONS_00279454	0.719796	3.43123e-07
TCONS_00122554	TCONS_00291739	0.753018	1.06007e-07
TCONS_00122554	TCONS_00334774	0.736326	1.9075e-07
TCONS_00123159	TCONS_00015094	-0.715744	3.98305e-07
TCONS_00123159	TCONS_00037271	0.727251	2.6237e-07
TCONS_00123159	TCONS_00048105	0.705372	5.90268e-07
TCONS_00123159	TCONS_00048119	0.722551	3.10462e-07
TCONS_00123159	TCONS_00048123	0.725954	2.74764e-07
TCONS_00123159	TCONS_00053042	0.714772	4.12973e-07
TCONS_00123159	TCONS_00060556	-0.744591	1.4301e-07
TCONS_00123159	TCONS_00081605	-0.733409	2.11197e-07
TCONS_00123159	TCONS_00083960	0.702779	6.52929e-07
TCONS_00123159	TCONS_00103485	0.747184	1.30561e-07
TCONS_00123159	TCONS_00105505	0.7091	5.11473e-07
TCONS_00123159	TCONS_00117112	0.744429	1.43824e-07
TCONS_00123159	TCONS_00117128	0.712179	4.55113e-07
TCONS_00123159	TCONS_00117134	0.753829	1.02929e-07
TCONS_00123159	TCONS_00133285	0.708289	5.2756e-07
TCONS_00123159	TCONS_00133304	-0.750912	1.1437e-07
TCONS_00123159	TCONS_00133315	0.708938	5.14646e-07
TCONS_00123159	TCONS_00133319	0.710234	4.89855e-07
TCONS_00123159	TCONS_00143822	0.758853	8.53863e-08
TCONS_00123159	TCONS_00147258	0.780731	3.15679e-08
TCONS_00123159	TCONS_00168196	-0.786727	2.13657e-08
TCONS_00123159	TCONS_00178541	0.709586	5.02081e-07
TCONS_00123159	TCONS_00189589	-0.766632	6.26457e-08
TCONS_00123159	TCONS_00192743	0.878616	0
TCONS_00123159	TCONS_00208386	0.76339	7.1542e-08
TCONS_00123159	TCONS_00208389	0.86711	0
TCONS_00123159	TCONS_00208393	0.716393	3.88848e-07
TCONS_00123159	TCONS_00208398	0.82546	0
TCONS_00123159	TCONS_00208627	-0.796937	7.24686e-09
TCONS_00123159	TCONS_00208629	-0.754801	9.9331e-08
TCONS_00123159	TCONS_00269111	-0.716555	3.86523e-07
TCONS_00123159	TCONS_00272192	-0.806499	0
TCONS_00123159	TCONS_00291739	0.852038	0
TCONS_00123159	TCONS_00309503	-0.713151	4.38775e-07
TCONS_00123159	TCONS_00309589	0.736002	1.92917e-07
TCONS_00123159	TCONS_00310526	0.706669	5.61438e-07
TCONS_00123159	TCONS_00334774	0.727575	2.59368e-07
TCONS_00123399	TCONS_00060556	-0.769549	5.5264e-08
TCONS_00123399	TCONS_00168196	-0.809092	0
TCONS_00123399	TCONS_00192743	0.752694	1.07259e-07
TCONS_00123399	TCONS_00208389	0.706831	5.57944e-07
TCONS_00123399	TCONS_00291739	0.738919	1.74283e-07
TCONS_00123999	TCONS_00035507	0.717689	3.70675e-07
TCONS_00123999	TCONS_00048119	0.745077	1.40596e-07
TCONS_00123999	TCONS_00050901	0.720606	3.33138e-07
TCONS_00123999	TCONS_00099650	0.703914	6.24661e-07
TCONS_00123999	TCONS_00099953	0.706183	5.72064e-07
TCONS_00123999	TCONS_00117134	0.710558	4.83866e-07
TCONS_00123999	TCONS_00198779	0.725468	2.79576e-07
TCONS_00123999	TCONS_00309589	0.707641	5.40833e-07
TCONS_00124246	TCONS_00083960	0.764525	6.83404e-08
TCONS_00124246	TCONS_00143822	0.730492	2.3396e-07
TCONS_00124246	TCONS_00192743	0.716555	3.86523e-07
TCONS_00124364	TCONS_00001904	0.730654	2.32629e-07
TCONS_00124364	TCONS_00007692	-0.766956	6.17974e-08
TCONS_00124364	TCONS_00015094	-0.771007	5.17775e-08
TCONS_00124364	TCONS_00035507	0.792237	1.32761e-08
TCONS_00124364	TCONS_00043942	-0.738433	1.77257e-07
TCONS_00124364	TCONS_00048119	0.753991	1.02322e-07
TCONS_00124364	TCONS_00048123	0.783486	2.66876e-08
TCONS_00124364	TCONS_00053042	0.758853	8.53863e-08
TCONS_00124364	TCONS_00053050	0.799206	4.60136e-09
TCONS_00124364	TCONS_00057290	0.712665	4.46861e-07
TCONS_00124364	TCONS_00060422	0.704562	6.09111e-07
TCONS_00124364	TCONS_00060553	0.755935	9.52612e-08
TCONS_00124364	TCONS_00060566	0.707155	5.51029e-07
TCONS_00124364	TCONS_00069584	0.803582	0
TCONS_00124364	TCONS_00071233	0.773924	4.51837e-08
TCONS_00124364	TCONS_00081605	-0.759825	8.22717e-08
TCONS_00124364	TCONS_00083960	0.70991	4.95927e-07
TCONS_00124364	TCONS_00094523	0.755773	9.58344e-08
TCONS_00124364	TCONS_00099640	0.714934	4.10487e-07
TCONS_00124364	TCONS_00099953	0.722065	3.15966e-07
TCONS_00124364	TCONS_00117134	0.865327	0
TCONS_00124364	TCONS_00133284	0.786403	2.18783e-08
TCONS_00124364	TCONS_00133285	0.79953	4.23692e-09
TCONS_00124364	TCONS_00133302	0.742484	1.53933e-07
TCONS_00124364	TCONS_00133304	-0.795803	8.63296e-09
TCONS_00124364	TCONS_00133307	0.749939	1.18414e-07
TCONS_00124364	TCONS_00133315	0.84588	0
TCONS_00124364	TCONS_00143809	0.79013	1.62333e-08
TCONS_00124364	TCONS_00147258	0.775221	4.24066e-08
TCONS_00124364	TCONS_00159751	0.703266	6.40646e-07
TCONS_00124364	TCONS_00160837	0.750912	1.1437e-07
TCONS_00124364	TCONS_00168196	-0.717041	3.7964e-07
TCONS_00124364	TCONS_00172402	0.722713	3.0865e-07
TCONS_00124364	TCONS_00176210	0.761284	7.77551e-08
TCONS_00124364	TCONS_00178541	0.773762	4.55373e-08
TCONS_00124364	TCONS_00192743	0.7689	5.68563e-08
TCONS_00124364	TCONS_00198779	0.839397	0
TCONS_00124364	TCONS_00208386	0.70991	4.95927e-07
TCONS_00124364	TCONS_00208389	0.749291	1.21179e-07
TCONS_00124364	TCONS_00208393	0.764201	6.92452e-08
TCONS_00124364	TCONS_00208398	0.761446	7.72644e-08
TCONS_00124364	TCONS_00208627	-0.736974	1.8649e-07
TCONS_00124364	TCONS_00224414	0.700835	7.04692e-07
TCONS_00124364	TCONS_00228083	0.741998	1.56565e-07
TCONS_00124364	TCONS_00234888	0.789968	1.64675e-08
TCONS_00124364	TCONS_00235170	-0.707965	5.34151e-07
TCONS_00124364	TCONS_00235215	0.750101	1.17732e-07
TCONS_00124364	TCONS_00236503	0.747994	1.26879e-07
TCONS_00124364	TCONS_00258275	0.712341	4.52344e-07
TCONS_00124364	TCONS_00269111	-0.728385	2.52024e-07
TCONS_00124364	TCONS_00272192	-0.763877	7.01579e-08
TCONS_00124364	TCONS_00291723	0.748967	1.22582e-07
TCONS_00124364	TCONS_00291739	0.791913	1.37205e-08
TCONS_00124364	TCONS_00309503	-0.748481	1.24714e-07
TCONS_00124364	TCONS_00309589	0.788348	1.88655e-08
TCONS_00124364	TCONS_00334774	0.748643	1.24e-07
TCONS_00124365	TCONS_00001904	0.719634	3.45159e-07
TCONS_00124365	TCONS_00007692	-0.74605	1.3588e-07
TCONS_00124365	TCONS_00015094	-0.837939	0
TCONS_00124365	TCONS_00048119	0.777328	3.80837e-08
TCONS_00124365	TCONS_00048123	0.794344	1.0479e-08
TCONS_00124365	TCONS_00053042	0.863058	0
TCONS_00124365	TCONS_00053050	0.704886	6.01496e-07
TCONS_00124365	TCONS_00057000	0.70521	5.93985e-07
TCONS_00124365	TCONS_00060556	-0.782352	2.86561e-08
TCONS_00124365	TCONS_00069584	0.783972	2.58611e-08
TCONS_00124365	TCONS_00071233	0.804392	0
TCONS_00124365	TCONS_00081605	-0.740216	1.66594e-07
TCONS_00124365	TCONS_00083960	0.771331	5.10204e-08
TCONS_00124365	TCONS_00083981	-0.734705	2.01842e-07
TCONS_00124365	TCONS_00084219	0.719634	3.45159e-07
TCONS_00124365	TCONS_00089558	-0.714448	4.17995e-07
TCONS_00124365	TCONS_00103196	-0.746536	1.33577e-07
TCONS_00124365	TCONS_00103485	0.742484	1.53933e-07
TCONS_00124365	TCONS_00105505	0.713151	4.38775e-07
TCONS_00124365	TCONS_00117112	0.814116	0
TCONS_00124365	TCONS_00117128	0.786403	2.18783e-08
TCONS_00124365	TCONS_00117134	0.802123	1.43917e-09
TCONS_00124365	TCONS_00125968	0.796451	7.83564e-09
TCONS_00124365	TCONS_00133285	0.752046	1.09801e-07
TCONS_00124365	TCONS_00133302	0.718823	3.55545e-07
TCONS_00124365	TCONS_00133304	-0.803744	0
TCONS_00124365	TCONS_00133315	0.757232	9.07707e-08
TCONS_00124365	TCONS_00143810	0.767766	5.97081e-08
TCONS_00124365	TCONS_00143822	0.756746	9.2435e-08
TCONS_00124365	TCONS_00147258	0.798396	5.52709e-09
TCONS_00124365	TCONS_00156124	0.703914	6.24661e-07
TCONS_00124365	TCONS_00168196	-0.824163	0
TCONS_00124365	TCONS_00178541	0.739243	1.72328e-07
TCONS_00124365	TCONS_00189589	-0.782027	2.9229e-08
TCONS_00124365	TCONS_00192743	0.921076	0
TCONS_00124365	TCONS_00207509	0.734868	2.00703e-07
TCONS_00124365	TCONS_00207511	0.726927	2.6541e-07
TCONS_00124365	TCONS_00207513	0.784458	2.50448e-08
TCONS_00124365	TCONS_00208386	0.758528	8.64435e-08
TCONS_00124365	TCONS_00208389	0.886881	0
TCONS_00124365	TCONS_00208393	0.788024	1.93572e-08
TCONS_00124365	TCONS_00208398	0.870999	0
TCONS_00124365	TCONS_00208627	-0.844097	0
TCONS_00124365	TCONS_00208629	-0.764363	6.87918e-08
TCONS_00124365	TCONS_00224414	0.713313	4.36115e-07
TCONS_00124365	TCONS_00224424	0.742484	1.53933e-07
TCONS_00124365	TCONS_00234888	0.700997	7.00213e-07
TCONS_00124365	TCONS_00257289	0.719634	3.45159e-07
TCONS_00124365	TCONS_00258275	0.724171	2.92864e-07
TCONS_00124365	TCONS_00269104	0.708452	5.24298e-07
TCONS_00124365	TCONS_00269111	-0.807309	0
TCONS_00124365	TCONS_00272192	-0.881371	0
TCONS_00124365	TCONS_00291739	0.898712	0
TCONS_00124365	TCONS_00309503	-0.718013	3.6628e-07
TCONS_00124365	TCONS_00309589	0.744753	1.42201e-07
TCONS_00124365	TCONS_00334774	0.766956	6.17974e-08
TCONS_00124499	TCONS_00234888	0.718175	3.64105e-07
TCONS_00124499	TCONS_00291739	0.704724	6.0529e-07
TCONS_00124500	TCONS_00117112	0.709586	5.02081e-07
TCONS_00124500	TCONS_00143822	0.701645	6.826e-07
TCONS_00124500	TCONS_00174107	0.704886	6.01496e-07
TCONS_00124500	TCONS_00208389	0.708938	5.14646e-07
TCONS_00125144	TCONS_00071233	0.72644	2.70043e-07
TCONS_00125144	TCONS_00236503	0.71542	4.03129e-07
TCONS_00125150	TCONS_00103485	0.712341	4.52344e-07
TCONS_00125150	TCONS_00117134	0.706183	5.72064e-07
TCONS_00125255	TCONS_00015094	-0.742322	1.54806e-07
TCONS_00125255	TCONS_00048105	0.781217	3.06818e-08
TCONS_00125255	TCONS_00048119	0.797099	7.05234e-09
TCONS_00125255	TCONS_00048123	0.829998	0
TCONS_00125255	TCONS_00053042	0.840694	0
TCONS_00125255	TCONS_00053062	0.706345	5.68497e-07
TCONS_00125255	TCONS_00060556	-0.734381	2.04139e-07
TCONS_00125255	TCONS_00071233	0.755449	9.69889e-08
TCONS_00125255	TCONS_00079874	0.772466	4.84193e-08
TCONS_00125255	TCONS_00083960	0.720282	3.37092e-07
TCONS_00125255	TCONS_00089558	-0.708938	5.14646e-07
TCONS_00125255	TCONS_00103485	0.75626	9.41228e-08
TCONS_00125255	TCONS_00105505	0.77198	4.95248e-08
TCONS_00125255	TCONS_00117112	0.825946	0
TCONS_00125255	TCONS_00117121	0.711531	4.6638e-07
TCONS_00125255	TCONS_00117128	0.837777	0
TCONS_00125255	TCONS_00117132	0.751884	1.10444e-07
TCONS_00125255	TCONS_00117134	0.803095	4.42794e-10
TCONS_00125255	TCONS_00119220	-0.704076	6.20733e-07
TCONS_00125255	TCONS_00125968	0.789644	1.69391e-08
TCONS_00125255	TCONS_00133304	-0.765659	6.52345e-08
TCONS_00125255	TCONS_00133305	-0.704076	6.20733e-07
TCONS_00125255	TCONS_00133315	0.708127	5.30844e-07
TCONS_00125255	TCONS_00143822	0.786241	2.21363e-08
TCONS_00125255	TCONS_00147258	0.738109	1.79268e-07
TCONS_00125255	TCONS_00156124	0.780083	3.27663e-08
TCONS_00125255	TCONS_00168196	-0.83016	0
TCONS_00125255	TCONS_00189589	-0.732437	2.18512e-07
TCONS_00125255	TCONS_00192743	0.923669	0
TCONS_00125255	TCONS_00207513	0.732437	2.18512e-07
TCONS_00125255	TCONS_00208386	0.75626	9.41228e-08
TCONS_00125255	TCONS_00208389	0.861762	0
TCONS_00125255	TCONS_00208393	0.75156	1.1174e-07
TCONS_00125255	TCONS_00208398	0.854955	0
TCONS_00125255	TCONS_00208627	-0.835994	0
TCONS_00125255	TCONS_00208629	-0.727251	2.6237e-07
TCONS_00125255	TCONS_00224414	0.734543	2.02987e-07
TCONS_00125255	TCONS_00224424	0.723361	3.01521e-07
TCONS_00125255	TCONS_00269111	-0.749615	1.1979e-07
TCONS_00125255	TCONS_00272192	-0.796937	7.24686e-09
TCONS_00125255	TCONS_00284644	0.752208	1.09161e-07
TCONS_00125255	TCONS_00291739	0.871971	0
TCONS_00125255	TCONS_00334774	0.72563	2.77962e-07
TCONS_00125600	TCONS_00048119	0.709262	5.08321e-07
TCONS_00125600	TCONS_00048123	0.72012	3.39089e-07
TCONS_00125600	TCONS_00053042	0.740702	1.63798e-07
TCONS_00125600	TCONS_00060556	-0.783162	2.72443e-08
TCONS_00125600	TCONS_00083960	0.727089	2.63886e-07
TCONS_00125600	TCONS_00089558	-0.702617	6.5708e-07
TCONS_00125600	TCONS_00103485	0.752208	1.09161e-07
TCONS_00125600	TCONS_00117112	0.791751	1.39441e-08
TCONS_00125600	TCONS_00125969	0.710558	4.83866e-07
TCONS_00125600	TCONS_00133285	0.700997	7.00213e-07
TCONS_00125600	TCONS_00143822	0.775707	4.13885e-08
TCONS_00125600	TCONS_00147258	0.748157	1.26153e-07
TCONS_00125600	TCONS_00168196	-0.771818	4.98964e-08
TCONS_00125600	TCONS_00192743	0.791103	1.48481e-08
TCONS_00125600	TCONS_00208389	0.741188	1.61048e-07
TCONS_00125600	TCONS_00208627	-0.709262	5.08321e-07
TCONS_00125600	TCONS_00291739	0.79483	9.85554e-09
TCONS_00125742	TCONS_00192743	0.727413	2.60864e-07
TCONS_00126065	TCONS_00048105	0.701483	6.86958e-07
TCONS_00126065	TCONS_00053042	0.765335	6.61124e-08
TCONS_00126065	TCONS_00060556	-0.762418	7.43653e-08
TCONS_00126065	TCONS_00103485	0.773276	4.66069e-08
TCONS_00126065	TCONS_00117112	0.832591	0
TCONS_00126065	TCONS_00117128	0.809902	0
TCONS_00126065	TCONS_00117132	0.771331	5.10204e-08
TCONS_00126065	TCONS_00125968	0.783486	2.66876e-08
TCONS_00126065	TCONS_00168196	-0.723523	2.99768e-07
TCONS_00126065	TCONS_00189589	-0.747184	1.30561e-07
TCONS_00126065	TCONS_00192743	0.868082	0
TCONS_00126065	TCONS_00208389	0.779596	3.3678e-08
TCONS_00126065	TCONS_00208398	0.704238	6.16832e-07
TCONS_00126065	TCONS_00208627	-0.769387	5.56596e-08
TCONS_00126065	TCONS_00224414	0.707965	5.34151e-07
TCONS_00126065	TCONS_00272192	-0.75237	1.08524e-07
TCONS_00126065	TCONS_00284644	0.728547	2.50582e-07
TCONS_00126065	TCONS_00291739	0.821246	0
TCONS_00126794	TCONS_00010809	0.701807	6.78273e-07
TCONS_00126794	TCONS_00060422	0.704076	6.20733e-07
TCONS_00126794	TCONS_00060553	0.715744	3.98305e-07
TCONS_00126794	TCONS_00114962	0.716068	3.93545e-07
TCONS_00126794	TCONS_00117134	0.714124	4.23086e-07
TCONS_00126794	TCONS_00133304	-0.770359	5.33109e-08
TCONS_00126794	TCONS_00159751	0.713637	4.30851e-07
TCONS_00126794	TCONS_00160837	0.717689	3.70675e-07
TCONS_00126794	TCONS_00176210	0.743133	1.5049e-07
TCONS_00126794	TCONS_00208627	-0.729844	2.39365e-07
TCONS_00126794	TCONS_00235159	-0.709262	5.08321e-07
TCONS_00126794	TCONS_00309503	-0.71072	4.80902e-07
TCONS_00126905	TCONS_00048119	0.700673	7.09203e-07
TCONS_00127813	TCONS_00035893	0.718823	3.55545e-07
TCONS_00127813	TCONS_00060421	0.736974	1.8649e-07
TCONS_00127813	TCONS_00127022	0.703266	6.40646e-07
TCONS_00127813	TCONS_00139640	0.701969	6.73976e-07
TCONS_00127813	TCONS_00159742	0.701969	6.73976e-07
TCONS_00127813	TCONS_00160842	0.766794	6.22207e-08
TCONS_00127813	TCONS_00220775	-0.717365	3.75128e-07
TCONS_00127813	TCONS_00278135	0.746536	1.33577e-07
TCONS_00127824	TCONS_00307434	0.721741	3.19695e-07
TCONS_00127850	TCONS_00048108	0.728061	2.54934e-07
TCONS_00127850	TCONS_00060421	0.76809	5.88846e-08
TCONS_00127850	TCONS_00160840	0.720768	3.31179e-07
TCONS_00127850	TCONS_00183611	0.740864	1.62876e-07
TCONS_00127850	TCONS_00220772	0.703914	6.24661e-07
TCONS_00127850	TCONS_00228079	0.732437	2.18512e-07
TCONS_00127850	TCONS_00270595	0.72644	2.70043e-07
TCONS_00127927	TCONS_00176209	0.747508	1.29077e-07
TCONS_00127930	TCONS_00007692	-0.705859	5.7927e-07
TCONS_00127930	TCONS_00015094	-0.740216	1.66594e-07
TCONS_00127930	TCONS_00048119	0.722227	3.14119e-07
TCONS_00127930	TCONS_00048123	0.763066	7.24749e-08
TCONS_00127930	TCONS_00051933	0.705372	5.90268e-07
TCONS_00127930	TCONS_00060553	0.790293	1.59999e-08
TCONS_00127930	TCONS_00099953	0.712665	4.46861e-07
TCONS_00127930	TCONS_00117134	0.764039	6.97006e-08
TCONS_00127930	TCONS_00133285	0.709262	5.08321e-07
TCONS_00127930	TCONS_00133302	0.727899	2.56403e-07
TCONS_00127930	TCONS_00133304	-0.710558	4.83866e-07
TCONS_00127930	TCONS_00133307	0.724982	2.8448e-07
TCONS_00127930	TCONS_00133315	0.767928	5.92955e-08
TCONS_00127930	TCONS_00178541	0.748319	1.25432e-07
TCONS_00127930	TCONS_00208393	0.764201	6.92452e-08
TCONS_00127930	TCONS_00208398	0.711369	4.69245e-07
TCONS_00127930	TCONS_00208627	-0.769062	5.64557e-08
TCONS_00127930	TCONS_00224414	0.7091	5.11473e-07
TCONS_00127930	TCONS_00228083	0.737136	1.85441e-07
TCONS_00127930	TCONS_00235169	-0.710396	4.8685e-07
TCONS_00127930	TCONS_00252281	-0.779596	3.3678e-08
TCONS_00127930	TCONS_00272192	-0.734705	2.01842e-07
TCONS_00127930	TCONS_00291723	0.73503	1.99571e-07
TCONS_00127930	TCONS_00291739	0.743943	1.4629e-07
TCONS_00127930	TCONS_00309589	0.791265	1.46207e-08
TCONS_00127930	TCONS_00316454	-0.71072	4.80902e-07
TCONS_00127930	TCONS_00334774	0.801961	1.60799e-09
TCONS_00128107	TCONS_00048123	0.750101	1.17732e-07
TCONS_00128107	TCONS_00056998	-0.718985	3.53441e-07
TCONS_00128107	TCONS_00117128	0.756746	9.2435e-08
TCONS_00128107	TCONS_00117134	0.767928	5.92955e-08
TCONS_00128107	TCONS_00133304	-0.709748	4.98993e-07
TCONS_00128107	TCONS_00160837	0.701645	6.826e-07
TCONS_00128107	TCONS_00208627	-0.776193	4.03828e-08
TCONS_00128107	TCONS_00252281	-0.70521	5.93985e-07
TCONS_00128107	TCONS_00291739	0.702941	6.48807e-07
TCONS_00128107	TCONS_00307434	0.700673	7.09203e-07
TCONS_00128107	TCONS_00309589	0.744753	1.42201e-07
TCONS_00128107	TCONS_00316454	-0.735678	1.95109e-07
TCONS_00128107	TCONS_00334774	0.72563	2.77962e-07
TCONS_00128342	TCONS_00089558	-0.7044	6.12958e-07
TCONS_00128342	TCONS_00117112	0.787375	2.03531e-08
TCONS_00128342	TCONS_00117128	0.736974	1.8649e-07
TCONS_00128342	TCONS_00117132	0.753991	1.02322e-07
TCONS_00128342	TCONS_00168196	-0.702455	6.6126e-07
TCONS_00128342	TCONS_00174107	0.708127	5.30844e-07
TCONS_00128342	TCONS_00192743	0.813953	0
TCONS_00128342	TCONS_00208386	0.728547	2.50582e-07
TCONS_00128342	TCONS_00208389	0.772952	4.73274e-08
TCONS_00128342	TCONS_00208398	0.783162	2.72443e-08
TCONS_00128342	TCONS_00208627	-0.714124	4.23086e-07
TCONS_00128342	TCONS_00291739	0.708938	5.14646e-07
TCONS_00128696	TCONS_00168196	-0.730654	2.32629e-07
TCONS_00128696	TCONS_00189589	-0.765497	6.56725e-08
TCONS_00128696	TCONS_00192743	0.717041	3.7964e-07
TCONS_00128696	TCONS_00208389	0.782514	2.83714e-08
TCONS_00128696	TCONS_00208393	0.719148	3.5135e-07
TCONS_00128696	TCONS_00208398	0.74686	1.32061e-07
TCONS_00128696	TCONS_00252281	-0.713313	4.36115e-07
TCONS_00128696	TCONS_00272192	-0.730654	2.32629e-07
TCONS_00128696	TCONS_00291739	0.721741	3.19695e-07
TCONS_00129060	TCONS_00048105	0.748805	1.23289e-07
TCONS_00129060	TCONS_00048123	0.777328	3.80837e-08
TCONS_00129060	TCONS_00053042	0.714772	4.12973e-07
TCONS_00129060	TCONS_00083960	0.704238	6.16832e-07
TCONS_00129060	TCONS_00103485	0.75318	1.05385e-07
TCONS_00129060	TCONS_00117112	0.701645	6.826e-07
TCONS_00129060	TCONS_00125968	0.710234	4.89855e-07
TCONS_00129060	TCONS_00133304	-0.700997	7.00213e-07
TCONS_00129060	TCONS_00143822	0.794992	9.64954e-09
TCONS_00129060	TCONS_00165584	0.741188	1.61048e-07
TCONS_00129060	TCONS_00168196	-0.817681	0
TCONS_00129060	TCONS_00189589	-0.732112	2.21009e-07
TCONS_00129060	TCONS_00192743	0.838425	0
TCONS_00129060	TCONS_00208389	0.827891	0
TCONS_00129060	TCONS_00208398	0.726116	2.73181e-07
TCONS_00129060	TCONS_00208627	-0.801151	2.46406e-09
TCONS_00129060	TCONS_00291739	0.820112	0
TCONS_00130066	TCONS_00117132	0.755449	9.69889e-08
TCONS_00130066	TCONS_00192743	0.747346	1.29817e-07
TCONS_00130066	TCONS_00208389	0.73503	1.99571e-07
TCONS_00130066	TCONS_00284644	0.704238	6.16832e-07
TCONS_00130066	TCONS_00291739	0.711693	4.63535e-07
TCONS_00130094	TCONS_00001903	0.706669	5.61438e-07
TCONS_00130094	TCONS_00001904	0.775383	4.20659e-08
TCONS_00130094	TCONS_00015094	-0.787375	2.03531e-08
TCONS_00130094	TCONS_00043942	-0.834049	0
TCONS_00130094	TCONS_00048119	0.766307	6.35013e-08
TCONS_00130094	TCONS_00053050	0.721254	3.25381e-07
TCONS_00130094	TCONS_00079874	0.705048	5.97727e-07
TCONS_00130094	TCONS_00103485	0.718985	3.53441e-07
TCONS_00130094	TCONS_00105505	0.70051	7.13746e-07
TCONS_00130094	TCONS_00114967	0.70051	7.13746e-07
TCONS_00130094	TCONS_00117128	0.712665	4.46861e-07
TCONS_00130094	TCONS_00117134	0.759015	8.48613e-08
TCONS_00130094	TCONS_00119220	-0.730168	2.36646e-07
TCONS_00130094	TCONS_00133304	-0.729195	2.44904e-07
TCONS_00130094	TCONS_00156124	0.844421	0
TCONS_00130094	TCONS_00168196	-0.790293	1.59999e-08
TCONS_00130094	TCONS_00192743	0.760959	7.87431e-08
TCONS_00130094	TCONS_00208389	0.754477	1.00519e-07
TCONS_00130094	TCONS_00208393	0.83097	0
TCONS_00130094	TCONS_00208398	0.769711	5.48701e-08
TCONS_00130094	TCONS_00208627	-0.818329	0
TCONS_00130094	TCONS_00208629	-0.710558	4.83866e-07
TCONS_00130094	TCONS_00224287	-0.701321	6.91345e-07
TCONS_00130094	TCONS_00234862	0.714124	4.23086e-07
TCONS_00130094	TCONS_00252281	-0.768576	5.76625e-08
TCONS_00130094	TCONS_00272192	-0.775545	4.17265e-08
TCONS_00130094	TCONS_00291739	0.752856	1.06632e-07
TCONS_00130094	TCONS_00309579	0.7044	6.12958e-07
TCONS_00130094	TCONS_00309589	0.738757	1.75269e-07
TCONS_00130094	TCONS_00316454	-0.752694	1.07259e-07
TCONS_00130094	TCONS_00316456	0.756584	9.2995e-08
TCONS_00131842	TCONS_00015094	-0.708289	5.2756e-07
TCONS_00131842	TCONS_00037271	0.704724	6.0529e-07
TCONS_00131842	TCONS_00048123	0.72012	3.39089e-07
TCONS_00131842	TCONS_00089558	-0.705696	5.82911e-07
TCONS_00131842	TCONS_00105505	0.727089	2.63886e-07
TCONS_00131842	TCONS_00117112	0.733895	2.07637e-07
TCONS_00131842	TCONS_00117134	0.726764	2.66945e-07
TCONS_00131842	TCONS_00168196	-0.768414	5.80682e-08
TCONS_00131842	TCONS_00192743	0.790617	1.55363e-08
TCONS_00131842	TCONS_00208386	0.711207	4.7213e-07
TCONS_00131842	TCONS_00208389	0.764039	6.97006e-08
TCONS_00131842	TCONS_00208398	0.761446	7.72644e-08
TCONS_00131842	TCONS_00208627	-0.719634	3.45159e-07
TCONS_00131842	TCONS_00272192	-0.717851	3.6847e-07
TCONS_00131842	TCONS_00291739	0.758853	8.53863e-08
TCONS_00131842	TCONS_00309589	0.726116	2.73181e-07
TCONS_00131842	TCONS_00334774	0.777003	3.87339e-08
TCONS_00132457	TCONS_00270593	-0.709262	5.08321e-07
TCONS_00132752	TCONS_00167578	0.7044	6.12958e-07
TCONS_00132752	TCONS_00183611	0.750912	1.1437e-07
TCONS_00132752	TCONS_00186419	-0.700024	7.27564e-07
TCONS_00132752	TCONS_00193375	-0.702779	6.52929e-07
TCONS_00132752	TCONS_00198779	0.700835	7.04692e-07
TCONS_00132752	TCONS_00224137	-0.704076	6.20733e-07
TCONS_00132752	TCONS_00224146	0.723037	3.05063e-07
TCONS_00132752	TCONS_00316467	-0.714934	4.10487e-07
TCONS_00133294	TCONS_00007692	-0.721092	3.27301e-07
TCONS_00133294	TCONS_00010809	0.721092	3.27301e-07
TCONS_00133294	TCONS_00051931	0.718823	3.55545e-07
TCONS_00133294	TCONS_00051933	0.774735	4.34374e-08
TCONS_00133294	TCONS_00057290	0.722551	3.10462e-07
TCONS_00133294	TCONS_00060422	0.767766	5.97081e-08
TCONS_00133294	TCONS_00097174	0.718985	3.53441e-07
TCONS_00133294	TCONS_00099640	0.736974	1.8649e-07
TCONS_00133294	TCONS_00099650	0.727413	2.60864e-07
TCONS_00133294	TCONS_00099951	0.724009	2.94574e-07
TCONS_00133294	TCONS_00099953	0.729844	2.39365e-07
TCONS_00133294	TCONS_00103194	0.84118	0
TCONS_00133294	TCONS_00103202	0.782838	2.78056e-08
TCONS_00133294	TCONS_00103203	0.736194	2.75747e-08
TCONS_00133294	TCONS_00127017	0.703103	6.44712e-07
TCONS_00133294	TCONS_00133284	0.806661	0
TCONS_00133294	TCONS_00133285	0.825784	0
TCONS_00133294	TCONS_00133302	0.803744	0
TCONS_00133294	TCONS_00133307	0.786565	2.16215e-08
TCONS_00133294	TCONS_00133315	0.817843	0
TCONS_00133294	TCONS_00133319	0.834373	0
TCONS_00133294	TCONS_00133321	0.704076	6.20733e-07
TCONS_00133294	TCONS_00159751	0.783972	2.58611e-08
TCONS_00133294	TCONS_00176209	0.79013	1.62333e-08
TCONS_00133294	TCONS_00176210	0.753991	1.02322e-07
TCONS_00133294	TCONS_00183612	0.729682	2.40737e-07
TCONS_00133294	TCONS_00198776	0.751398	1.12392e-07
TCONS_00133294	TCONS_00198779	0.755449	9.69889e-08
TCONS_00133294	TCONS_00228083	0.766632	6.26457e-08
TCONS_00133294	TCONS_00235169	-0.736488	1.89676e-07
TCONS_00133294	TCONS_00235180	0.747184	1.30561e-07
TCONS_00133294	TCONS_00235215	0.718823	3.55545e-07
TCONS_00133294	TCONS_00274231	0.747994	1.26879e-07
TCONS_00133294	TCONS_00274238	0.73114	2.28685e-07
TCONS_00133294	TCONS_00274241	0.716717	3.84213e-07
TCONS_00133991	TCONS_00057290	0.709586	5.02081e-07
TCONS_00133991	TCONS_00125349	0.725468	2.79576e-07
TCONS_00133991	TCONS_00160842	0.738757	1.75269e-07
TCONS_00133991	TCONS_00183616	0.729033	2.4631e-07
TCONS_00133991	TCONS_00270595	0.70359	6.32598e-07
TCONS_00133991	TCONS_00273477	0.718337	3.61944e-07
TCONS_00134147	TCONS_00015094	-0.747832	1.27608e-07
TCONS_00134147	TCONS_00189589	-0.71542	4.03129e-07
TCONS_00134147	TCONS_00192743	0.712503	4.49593e-07
TCONS_00134147	TCONS_00207513	0.752694	1.07259e-07
TCONS_00134147	TCONS_00208389	0.707317	5.47607e-07
TCONS_00134147	TCONS_00208393	0.721092	3.27301e-07
TCONS_00134147	TCONS_00208398	0.748481	1.24714e-07
TCONS_00134147	TCONS_00269111	-0.708289	5.2756e-07
TCONS_00134478	TCONS_00081605	-0.71623	3.91188e-07
TCONS_00134478	TCONS_00168196	-0.720282	3.37092e-07
TCONS_00134478	TCONS_00208389	0.71931	3.49273e-07
TCONS_00134478	TCONS_00272192	-0.777328	3.80837e-08
TCONS_00134478	TCONS_00288647	0.721416	3.23474e-07
TCONS_00134478	TCONS_00328609	-0.736812	1.87546e-07
TCONS_00135235	TCONS_00048105	0.767442	6.05385e-08
TCONS_00135235	TCONS_00048119	0.722713	3.0865e-07
TCONS_00135235	TCONS_00048123	0.72482	2.86135e-07
TCONS_00135235	TCONS_00053042	0.778948	3.49112e-08
TCONS_00135235	TCONS_00060556	-0.731302	2.27386e-07
TCONS_00135235	TCONS_00079848	0.705372	5.90268e-07
TCONS_00135235	TCONS_00079874	0.712341	4.52344e-07
TCONS_00135235	TCONS_00089558	-0.725792	2.76358e-07
TCONS_00135235	TCONS_00103485	0.749291	1.21179e-07
TCONS_00135235	TCONS_00105505	0.752694	1.07259e-07
TCONS_00135235	TCONS_00117112	0.785269	2.37064e-08
TCONS_00135235	TCONS_00117128	0.79953	4.23692e-09
TCONS_00135235	TCONS_00117132	0.706345	5.68497e-07
TCONS_00135235	TCONS_00125968	0.728223	2.53474e-07
TCONS_00135235	TCONS_00133305	-0.725306	2.812e-07
TCONS_00135235	TCONS_00143822	0.735354	1.97327e-07
TCONS_00135235	TCONS_00147258	0.702779	6.52929e-07
TCONS_00135235	TCONS_00156124	0.743133	1.5049e-07
TCONS_00135235	TCONS_00165584	0.705696	5.82911e-07
TCONS_00135235	TCONS_00168196	-0.810874	0
TCONS_00135235	TCONS_00189589	-0.7138	4.28245e-07
TCONS_00135235	TCONS_00192743	0.863706	0
TCONS_00135235	TCONS_00207513	0.701159	6.95764e-07
TCONS_00135235	TCONS_00208386	0.718823	3.55545e-07
TCONS_00135235	TCONS_00208389	0.839235	0
TCONS_00135235	TCONS_00208393	0.716393	3.88848e-07
TCONS_00135235	TCONS_00208398	0.81606	0
TCONS_00135235	TCONS_00208627	-0.802123	1.43917e-09
TCONS_00135235	TCONS_00208629	-0.744753	1.42201e-07
TCONS_00135235	TCONS_00272192	-0.767928	5.92955e-08
TCONS_00135235	TCONS_00284644	0.787051	2.08573e-08
TCONS_00135235	TCONS_00291739	0.857224	0
TCONS_00135510	TCONS_00117112	0.776355	4.00503e-08
TCONS_00135715	TCONS_00048123	0.706507	5.64955e-07
TCONS_00135715	TCONS_00053050	0.722551	3.10462e-07
TCONS_00135715	TCONS_00099953	0.726278	2.71607e-07
TCONS_00135788	TCONS_00015094	-0.715258	4.05565e-07
TCONS_00135788	TCONS_00048119	0.754639	9.99235e-08
TCONS_00135788	TCONS_00053042	0.788996	1.78942e-08
TCONS_00135788	TCONS_00168196	-0.711207	4.7213e-07
TCONS_00135788	TCONS_00272192	-0.752694	1.07259e-07
TCONS_00135788	TCONS_00291739	0.711693	4.63535e-07
TCONS_00135898	TCONS_00015094	-0.708452	5.24298e-07
TCONS_00135898	TCONS_00069584	0.703266	6.40646e-07
TCONS_00135898	TCONS_00117128	0.710072	4.9288e-07
TCONS_00135898	TCONS_00125968	0.715582	4.00709e-07
TCONS_00135898	TCONS_00192743	0.744267	1.44641e-07
TCONS_00135898	TCONS_00208389	0.727899	2.56403e-07
TCONS_00135898	TCONS_00208398	0.729195	2.44904e-07
TCONS_00135898	TCONS_00291739	0.721741	3.19695e-07
TCONS_00135952	TCONS_00053050	0.763066	7.24749e-08
TCONS_00135952	TCONS_00248881	0.748967	1.22582e-07
TCONS_00136049	TCONS_00192743	0.732599	2.17275e-07
TCONS_00136049	TCONS_00208389	0.703428	6.36609e-07
TCONS_00136325	TCONS_00023288	0.738919	1.74283e-07
TCONS_00136325	TCONS_00081623	0.770845	5.21585e-08
TCONS_00136325	TCONS_00097174	0.708938	5.14646e-07
TCONS_00136325	TCONS_00258275	0.708127	5.30844e-07
TCONS_00137285	TCONS_00001904	0.718985	3.53441e-07
TCONS_00137285	TCONS_00015094	-0.755935	9.52612e-08
TCONS_00137285	TCONS_00081605	-0.711531	4.6638e-07
TCONS_00137285	TCONS_00117112	0.775869	4.10519e-08
TCONS_00137285	TCONS_00117134	0.708776	5.17842e-07
TCONS_00137285	TCONS_00119220	-0.725144	2.82835e-07
TCONS_00137285	TCONS_00192743	0.766794	6.22207e-08
TCONS_00137285	TCONS_00207513	0.751722	1.1109e-07
TCONS_00137285	TCONS_00208389	0.740378	1.65657e-07
TCONS_00137285	TCONS_00208629	-0.781055	3.0976e-08
TCONS_00137285	TCONS_00269111	-0.732437	2.18512e-07
TCONS_00137285	TCONS_00272192	-0.707317	5.47607e-07
TCONS_00137285	TCONS_00291739	0.723523	2.99768e-07
TCONS_00137493	TCONS_00081605	-0.749291	1.21179e-07
TCONS_00137493	TCONS_00147258	0.715582	4.00709e-07
TCONS_00138187	TCONS_00053042	0.701807	6.78273e-07
TCONS_00138187	TCONS_00094527	-0.700186	7.22926e-07
TCONS_00138187	TCONS_00128090	0.704886	6.01496e-07
TCONS_00138187	TCONS_00307434	0.700835	7.04692e-07
TCONS_00138612	TCONS_00069584	0.725954	2.74764e-07
TCONS_00138612	TCONS_00097174	0.719472	3.47209e-07
TCONS_00138612	TCONS_00117112	0.723037	3.05063e-07
TCONS_00138612	TCONS_00133285	0.716555	3.86523e-07
TCONS_00138612	TCONS_00133315	0.710234	4.89855e-07
TCONS_00138612	TCONS_00143822	0.727251	2.6237e-07
TCONS_00138612	TCONS_00147258	0.847338	0
TCONS_00138612	TCONS_00192743	0.774086	4.48316e-08
TCONS_00138612	TCONS_00207508	0.706021	5.75654e-07
TCONS_00138612	TCONS_00207511	0.703752	6.28616e-07
TCONS_00138612	TCONS_00208389	0.82708	0
TCONS_00138612	TCONS_00208398	0.740378	1.65657e-07
TCONS_00138612	TCONS_00257289	0.718499	3.59797e-07
TCONS_00138612	TCONS_00272192	-0.755611	9.64103e-08
TCONS_00138612	TCONS_00291739	0.76728	6.09564e-08
TCONS_00138612	TCONS_00328609	-0.715582	4.00709e-07
TCONS_00140580	TCONS_00064941	0.715744	3.98305e-07
TCONS_00140580	TCONS_00156124	0.708776	5.17842e-07
TCONS_00140580	TCONS_00168196	-0.707965	5.34151e-07
TCONS_00140580	TCONS_00192743	0.778462	3.58494e-08
TCONS_00140580	TCONS_00208389	0.73746	1.8336e-07
TCONS_00140838	TCONS_00048105	0.738595	1.7626e-07
TCONS_00140838	TCONS_00048123	0.718985	3.53441e-07
TCONS_00140838	TCONS_00053042	0.734705	2.01842e-07
TCONS_00140838	TCONS_00103485	0.741026	1.6196e-07
TCONS_00140838	TCONS_00117112	0.810874	0
TCONS_00140838	TCONS_00117132	0.741188	1.61048e-07
TCONS_00140838	TCONS_00125968	0.767118	6.1376e-08
TCONS_00140838	TCONS_00143822	0.782676	2.80879e-08
TCONS_00140838	TCONS_00168196	-0.782514	2.83714e-08
TCONS_00140838	TCONS_00174107	0.745726	1.37435e-07
TCONS_00140838	TCONS_00176325	0.791265	1.46207e-08
TCONS_00140838	TCONS_00189589	-0.718175	3.64105e-07
TCONS_00140838	TCONS_00192743	0.882668	0
TCONS_00140838	TCONS_00208389	0.823839	0
TCONS_00140838	TCONS_00208398	0.764039	6.97006e-08
TCONS_00140838	TCONS_00208627	-0.714286	4.20532e-07
TCONS_00140838	TCONS_00284644	0.716879	3.81919e-07
TCONS_00140838	TCONS_00291739	0.818653	0
TCONS_00141431	TCONS_00117134	0.702455	6.6126e-07
TCONS_00141679	TCONS_00035508	0.763714	7.06173e-08
TCONS_00141717	TCONS_00117132	0.738271	1.7826e-07
TCONS_00141720	TCONS_00001901	0.737947	1.80282e-07
TCONS_00141798	TCONS_00083960	0.710558	4.83866e-07
TCONS_00141798	TCONS_00192743	0.773924	4.51837e-08
TCONS_00141798	TCONS_00208398	0.757556	8.96739e-08
TCONS_00141798	TCONS_00224433	0.702617	6.5708e-07
TCONS_00141865	TCONS_00048123	0.72563	2.77962e-07
TCONS_00141865	TCONS_00117128	0.706831	5.57944e-07
TCONS_00141865	TCONS_00125968	0.701807	6.78273e-07
TCONS_00141865	TCONS_00128090	0.736326	1.9075e-07
TCONS_00141865	TCONS_00192743	0.707155	5.51029e-07
TCONS_00141865	TCONS_00208398	0.728385	2.52024e-07
TCONS_00141865	TCONS_00291739	0.70991	4.95927e-07
TCONS_00141865	TCONS_00307434	0.714772	4.12973e-07
TCONS_00141865	TCONS_00334774	0.727737	2.5788e-07
TCONS_00142039	TCONS_00125968	0.702293	6.6547e-07
TCONS_00142393	TCONS_00007692	-0.743133	1.5049e-07
TCONS_00142393	TCONS_00015094	-0.716717	3.84213e-07
TCONS_00142393	TCONS_00089558	-0.791589	1.41686e-08
TCONS_00142393	TCONS_00117112	0.745888	1.36655e-07
TCONS_00142393	TCONS_00117128	0.706345	5.68497e-07
TCONS_00142393	TCONS_00133315	0.714772	4.12973e-07
TCONS_00142393	TCONS_00147258	0.722713	3.0865e-07
TCONS_00142393	TCONS_00208389	0.742484	1.53933e-07
TCONS_00142393	TCONS_00208398	0.771818	4.98964e-08
TCONS_00142393	TCONS_00269111	-0.78381	2.61355e-08
TCONS_00142982	TCONS_00053042	0.784458	2.50448e-08
TCONS_00142982	TCONS_00071233	0.730168	2.36646e-07
TCONS_00142982	TCONS_00105505	0.747184	1.30561e-07
TCONS_00142982	TCONS_00143507	0.714448	4.17995e-07
TCONS_00142982	TCONS_00143822	0.748967	1.22582e-07
TCONS_00142982	TCONS_00192743	0.781703	2.98066e-08
TCONS_00142982	TCONS_00208389	0.780245	3.24649e-08
TCONS_00142982	TCONS_00208398	0.721092	3.27301e-07
TCONS_00142982	TCONS_00291739	0.706507	5.64955e-07
TCONS_00144032	TCONS_00257289	0.715744	3.98305e-07
TCONS_00144239	TCONS_00053042	0.767928	5.92955e-08
TCONS_00144239	TCONS_00125968	0.709586	5.02081e-07
TCONS_00144239	TCONS_00143822	0.747346	1.29817e-07
TCONS_00144239	TCONS_00192743	0.734868	2.00703e-07
TCONS_00144239	TCONS_00291739	0.751236	1.13048e-07
TCONS_00145384	TCONS_00010811	0.72012	3.39089e-07
TCONS_00145384	TCONS_00035507	0.71542	4.03129e-07
TCONS_00145384	TCONS_00051933	0.765659	6.52345e-08
TCONS_00145384	TCONS_00057290	0.712017	4.57901e-07
TCONS_00145384	TCONS_00060422	0.801799	1.77761e-09
TCONS_00145384	TCONS_00070278	0.711207	4.7213e-07
TCONS_00145384	TCONS_00094509	0.765011	6.69978e-08
TCONS_00145384	TCONS_00099951	0.750263	1.17053e-07
TCONS_00145384	TCONS_00099953	0.797099	7.05234e-09
TCONS_00145384	TCONS_00103194	0.701807	6.78273e-07
TCONS_00145384	TCONS_00114962	0.758366	8.69757e-08
TCONS_00145384	TCONS_00125349	0.701159	6.95764e-07
TCONS_00145384	TCONS_00133307	0.712989	4.41452e-07
TCONS_00145384	TCONS_00133315	0.704238	6.16832e-07
TCONS_00145384	TCONS_00176210	0.711207	4.7213e-07
TCONS_00145384	TCONS_00178541	0.70359	6.32598e-07
TCONS_00145384	TCONS_00183612	0.739729	1.69437e-07
TCONS_00145384	TCONS_00183616	0.731626	2.24812e-07
TCONS_00145384	TCONS_00186419	-0.712017	4.57901e-07
TCONS_00145384	TCONS_00189580	0.76258	7.38896e-08
TCONS_00145384	TCONS_00228083	0.788996	1.78942e-08
TCONS_00145384	TCONS_00235159	-0.753667	1.03538e-07
TCONS_00145384	TCONS_00235169	-0.815088	0
TCONS_00145384	TCONS_00235170	-0.799044	4.78483e-09
TCONS_00145384	TCONS_00235171	-0.744429	1.43824e-07
TCONS_00145384	TCONS_00235180	0.705048	5.97727e-07
TCONS_00145384	TCONS_00235208	0.711693	4.63535e-07
TCONS_00145384	TCONS_00235215	0.745402	1.39007e-07
TCONS_00145384	TCONS_00252271	0.726278	2.71607e-07
TCONS_00145384	TCONS_00291723	0.712827	4.44147e-07
TCONS_00146448	TCONS_00035893	0.749291	1.21179e-07
TCONS_00146448	TCONS_00060421	0.735354	1.97327e-07
TCONS_00146448	TCONS_00064932	0.782838	2.78056e-08
TCONS_00146448	TCONS_00070278	0.719148	3.5135e-07
TCONS_00146448	TCONS_00094509	0.709748	4.98993e-07
TCONS_00146448	TCONS_00159742	0.756746	9.2435e-08
TCONS_00146448	TCONS_00172402	0.730006	2.38001e-07
TCONS_00146448	TCONS_00176328	0.71542	4.03129e-07
TCONS_00146448	TCONS_00183611	0.760311	8.07459e-08
TCONS_00146448	TCONS_00189580	0.701321	6.91345e-07
TCONS_00146448	TCONS_00235160	-0.733247	2.12398e-07
TCONS_00146448	TCONS_00235169	-0.721741	3.19695e-07
TCONS_00146448	TCONS_00235170	-0.764201	6.92452e-08
TCONS_00146448	TCONS_00235171	-0.712827	4.44147e-07
TCONS_00146448	TCONS_00288625	0.738433	1.77257e-07
TCONS_00146448	TCONS_00316467	-0.77198	4.95248e-08
TCONS_00147227	TCONS_00053042	0.732599	2.17275e-07
TCONS_00147227	TCONS_00083960	0.775545	4.17265e-08
TCONS_00147227	TCONS_00143822	0.797423	6.66588e-09
TCONS_00147227	TCONS_00147258	0.777328	3.80837e-08
TCONS_00147227	TCONS_00168196	-0.738919	1.74283e-07
TCONS_00147227	TCONS_00192743	0.768738	5.72585e-08
TCONS_00147227	TCONS_00208389	0.76728	6.09564e-08
TCONS_00147227	TCONS_00208398	0.709586	5.02081e-07
TCONS_00147227	TCONS_00208627	-0.7044	6.12958e-07
TCONS_00147227	TCONS_00272192	-0.721092	3.27301e-07
TCONS_00147227	TCONS_00291739	0.783	2.75244e-08
TCONS_00147227	TCONS_00309503	-0.744753	1.42201e-07
TCONS_00147228	TCONS_00089558	-0.706183	5.72064e-07
TCONS_00147228	TCONS_00117112	0.799206	4.60136e-09
TCONS_00147228	TCONS_00117128	0.713637	4.30851e-07
TCONS_00147228	TCONS_00125968	0.734705	2.01842e-07
TCONS_00147228	TCONS_00133305	-0.739243	1.72328e-07
TCONS_00147228	TCONS_00147258	0.744105	1.45464e-07
TCONS_00147228	TCONS_00168196	-0.731464	2.26095e-07
TCONS_00147228	TCONS_00189589	-0.750101	1.17732e-07
TCONS_00147228	TCONS_00192743	0.864193	0
TCONS_00147228	TCONS_00208389	0.851876	0
TCONS_00147228	TCONS_00208398	0.804716	0
TCONS_00147228	TCONS_00208627	-0.74605	1.3588e-07
TCONS_00147228	TCONS_00272192	-0.714772	4.12973e-07
TCONS_00147228	TCONS_00284644	0.716068	3.93545e-07
TCONS_00147228	TCONS_00291739	0.856252	0
TCONS_00147638	TCONS_00010809	0.702131	6.69708e-07
TCONS_00147638	TCONS_00056998	-0.702293	6.6547e-07
TCONS_00147638	TCONS_00057290	0.737785	1.81302e-07
TCONS_00147638	TCONS_00060422	0.728061	2.54934e-07
TCONS_00147638	TCONS_00099636	0.730006	2.38001e-07
TCONS_00147638	TCONS_00099640	0.713151	4.38775e-07
TCONS_00147638	TCONS_00133285	0.745239	1.39799e-07
TCONS_00147638	TCONS_00133302	0.7044	6.12958e-07
TCONS_00147638	TCONS_00176209	0.76339	7.1542e-08
TCONS_00147638	TCONS_00178541	0.707479	5.44208e-07
TCONS_00147638	TCONS_00183612	0.750263	1.17053e-07
TCONS_00148111	TCONS_00010809	0.711207	4.7213e-07
TCONS_00148111	TCONS_00023288	0.75788	8.85872e-08
TCONS_00148111	TCONS_00035898	-0.798234	5.71476e-09
TCONS_00148111	TCONS_00051931	0.72563	2.77962e-07
TCONS_00148111	TCONS_00051933	0.711693	4.63535e-07
TCONS_00148111	TCONS_00060422	0.757556	8.96739e-08
TCONS_00148111	TCONS_00069584	0.717689	3.70675e-07
TCONS_00148111	TCONS_00094509	0.781217	3.06818e-08
TCONS_00148111	TCONS_00099953	0.751722	1.1109e-07
TCONS_00148111	TCONS_00133285	0.747508	1.29077e-07
TCONS_00148111	TCONS_00133307	0.771818	4.98964e-08
TCONS_00148111	TCONS_00133315	0.741026	1.6196e-07
TCONS_00148111	TCONS_00139883	0.719472	3.47209e-07
TCONS_00148111	TCONS_00147258	0.77911	3.4601e-08
TCONS_00148111	TCONS_00169824	0.706345	5.68497e-07
TCONS_00148111	TCONS_00178541	0.749615	1.1979e-07
TCONS_00148111	TCONS_00183612	0.714448	4.17995e-07
TCONS_00148111	TCONS_00189576	0.774086	4.48316e-08
TCONS_00148111	TCONS_00189580	0.723199	3.03287e-07
TCONS_00148111	TCONS_00235169	-0.706669	5.61438e-07
TCONS_00148111	TCONS_00258275	0.721903	3.17825e-07
TCONS_00148111	TCONS_00291723	0.700835	7.04692e-07
TCONS_00148111	TCONS_00309503	-0.760311	8.07459e-08
TCONS_00148111	TCONS_00327825	0.702617	6.5708e-07
TCONS_00148111	TCONS_00334778	0.710396	4.8685e-07
TCONS_00148120	TCONS_00007692	-0.723037	3.05063e-07
TCONS_00148120	TCONS_00023288	0.703103	6.44712e-07
TCONS_00148120	TCONS_00035898	-0.700348	7.1832e-07
TCONS_00148120	TCONS_00060422	0.771493	5.06441e-08
TCONS_00148120	TCONS_00064289	0.71542	4.03129e-07
TCONS_00148120	TCONS_00099640	0.729844	2.39365e-07
TCONS_00148120	TCONS_00099951	0.755287	9.75703e-08
TCONS_00148120	TCONS_00099953	0.829673	0
TCONS_00148120	TCONS_00114962	0.727089	2.63886e-07
TCONS_00148120	TCONS_00114966	0.755935	9.52612e-08
TCONS_00148120	TCONS_00117134	0.708127	5.30844e-07
TCONS_00148120	TCONS_00127017	0.752046	1.09801e-07
TCONS_00148120	TCONS_00133284	0.769225	5.60568e-08
TCONS_00148120	TCONS_00133285	0.75318	1.05385e-07
TCONS_00148120	TCONS_00133302	0.704076	6.20733e-07
TCONS_00148120	TCONS_00133315	0.788996	1.78942e-08
TCONS_00148120	TCONS_00139883	0.741836	1.57452e-07
TCONS_00148120	TCONS_00143809	0.725954	2.74764e-07
TCONS_00148120	TCONS_00178541	0.71072	4.80902e-07
TCONS_00148120	TCONS_00183612	0.712827	4.44147e-07
TCONS_00148120	TCONS_00183616	0.777814	3.71183e-08
TCONS_00148120	TCONS_00198776	0.710558	4.83866e-07
TCONS_00148120	TCONS_00198779	0.714934	4.10487e-07
TCONS_00148120	TCONS_00228083	0.769062	5.64557e-08
TCONS_00148120	TCONS_00235169	-0.775545	4.17265e-08
TCONS_00148120	TCONS_00235170	-0.748319	1.25432e-07
TCONS_00148120	TCONS_00235215	0.746212	1.35108e-07
TCONS_00148120	TCONS_00291723	0.796289	8.03365e-09
TCONS_00148120	TCONS_00318582	0.719148	3.5135e-07
TCONS_00148125	TCONS_00007692	-0.703752	6.28616e-07
TCONS_00148125	TCONS_00010809	0.721741	3.19695e-07
TCONS_00148125	TCONS_00010811	0.754153	1.01718e-07
TCONS_00148125	TCONS_00023288	0.82627	0
TCONS_00148125	TCONS_00035507	0.781379	3.03889e-08
TCONS_00148125	TCONS_00035898	-0.86711	0
TCONS_00148125	TCONS_00051933	0.808281	0
TCONS_00148125	TCONS_00057290	0.79872	5.15428e-09
TCONS_00148125	TCONS_00057291	0.713962	4.25657e-07
TCONS_00148125	TCONS_00060422	0.852524	0
TCONS_00148125	TCONS_00063610	0.730521	3.98069e-08
TCONS_00148125	TCONS_00069584	0.788672	1.83778e-08
TCONS_00148125	TCONS_00081583	-0.724171	2.92864e-07
TCONS_00148125	TCONS_00094509	0.75788	8.85872e-08
TCONS_00148125	TCONS_00099640	0.715744	3.98305e-07
TCONS_00148125	TCONS_00099650	0.767118	6.1376e-08
TCONS_00148125	TCONS_00099951	0.825136	0
TCONS_00148125	TCONS_00099953	0.883802	0
TCONS_00148125	TCONS_00114962	0.78462	2.47749e-08
TCONS_00148125	TCONS_00114966	0.779759	3.33729e-08
TCONS_00148125	TCONS_00117134	0.719472	3.47209e-07
TCONS_00148125	TCONS_00133284	0.765173	6.65541e-08
TCONS_00148125	TCONS_00133285	0.812009	0
TCONS_00148125	TCONS_00133302	0.780245	3.24649e-08
TCONS_00148125	TCONS_00133307	0.824163	0
TCONS_00148125	TCONS_00133315	0.824001	0
TCONS_00148125	TCONS_00139883	0.812819	0
TCONS_00148125	TCONS_00143809	0.738919	1.74283e-07
TCONS_00148125	TCONS_00147258	0.785269	2.37064e-08
TCONS_00148125	TCONS_00159751	0.749291	1.21179e-07
TCONS_00148125	TCONS_00176208	0.721092	3.27301e-07
TCONS_00148125	TCONS_00176209	0.766632	6.26457e-08
TCONS_00148125	TCONS_00176210	0.752532	1.0789e-07
TCONS_00148125	TCONS_00178541	0.785917	2.26553e-08
TCONS_00148125	TCONS_00183612	0.839397	0
TCONS_00148125	TCONS_00183616	0.756746	9.2435e-08
TCONS_00148125	TCONS_00186415	0.76258	7.38896e-08
TCONS_00148125	TCONS_00189576	0.789644	1.69391e-08
TCONS_00148125	TCONS_00189580	0.727737	2.5788e-07
TCONS_00148125	TCONS_00198776	0.757232	9.07707e-08
TCONS_00148125	TCONS_00198779	0.77198	4.95248e-08
TCONS_00148125	TCONS_00208633	0.747508	1.29077e-07
TCONS_00148125	TCONS_00228083	0.833887	0
TCONS_00148125	TCONS_00235159	-0.751884	1.10444e-07
TCONS_00148125	TCONS_00235169	-0.858358	0
TCONS_00148125	TCONS_00235170	-0.824163	0
TCONS_00148125	TCONS_00235171	-0.735192	1.98446e-07
TCONS_00148125	TCONS_00235180	0.732761	2.16045e-07
TCONS_00148125	TCONS_00235208	0.722227	3.14119e-07
TCONS_00148125	TCONS_00235215	0.797909	6.09265e-09
TCONS_00148125	TCONS_00258275	0.843287	0
TCONS_00148125	TCONS_00262269	0.708452	5.24298e-07
TCONS_00148125	TCONS_00269012	-0.708938	5.14646e-07
TCONS_00148125	TCONS_00291723	0.807471	0
TCONS_00148125	TCONS_00309503	-0.725954	2.74764e-07
TCONS_00148125	TCONS_00327825	0.722227	3.14119e-07
TCONS_00148126	TCONS_00001904	0.702941	6.48807e-07
TCONS_00148126	TCONS_00007692	-0.745564	1.38219e-07
TCONS_00148126	TCONS_00043948	-0.765173	6.65541e-08
TCONS_00148126	TCONS_00048105	0.724334	2.91166e-07
TCONS_00148126	TCONS_00048119	0.799044	4.78483e-09
TCONS_00148126	TCONS_00048123	0.798071	5.90328e-09
TCONS_00148126	TCONS_00053042	0.755935	9.52612e-08
TCONS_00148126	TCONS_00071233	0.748805	1.23289e-07
TCONS_00148126	TCONS_00079848	0.713151	4.38775e-07
TCONS_00148126	TCONS_00089558	-0.776679	3.93894e-08
TCONS_00148126	TCONS_00117112	0.731464	2.26095e-07
TCONS_00148126	TCONS_00117128	0.718661	3.57664e-07
TCONS_00148126	TCONS_00117132	0.75707	9.13229e-08
TCONS_00148126	TCONS_00117134	0.808281	0
TCONS_00148126	TCONS_00133285	0.747994	1.26879e-07
TCONS_00148126	TCONS_00133315	0.749615	1.1979e-07
TCONS_00148126	TCONS_00143809	0.71542	4.03129e-07
TCONS_00148126	TCONS_00143822	0.763714	7.06173e-08
TCONS_00148126	TCONS_00168196	-0.75318	1.05385e-07
TCONS_00148126	TCONS_00192743	0.766632	6.26457e-08
TCONS_00148126	TCONS_00208389	0.718175	3.64105e-07
TCONS_00148126	TCONS_00208627	-0.767766	5.97081e-08
TCONS_00148126	TCONS_00224414	0.759177	8.43387e-08
TCONS_00148126	TCONS_00252281	-0.729195	2.44904e-07
TCONS_00148126	TCONS_00269111	-0.726116	2.73181e-07
TCONS_00148126	TCONS_00291723	0.724496	2.89478e-07
TCONS_00148126	TCONS_00291739	0.775869	4.10519e-08
TCONS_00148126	TCONS_00309503	-0.736326	1.9075e-07
TCONS_00148126	TCONS_00309589	0.729195	2.44904e-07
TCONS_00148126	TCONS_00334774	0.732437	2.18512e-07
TCONS_00149218	TCONS_00007692	-0.721903	3.17825e-07
TCONS_00149218	TCONS_00023288	0.750425	1.16377e-07
TCONS_00149218	TCONS_00037281	-0.715582	4.00709e-07
TCONS_00149218	TCONS_00048183	0.712046	1.23855e-07
TCONS_00149218	TCONS_00069584	0.756908	9.18776e-08
TCONS_00149218	TCONS_00094523	0.713637	4.30851e-07
TCONS_00149218	TCONS_00097174	0.729519	2.42117e-07
TCONS_00149218	TCONS_00133285	0.773276	4.66069e-08
TCONS_00149218	TCONS_00133315	0.728223	2.53474e-07
TCONS_00149218	TCONS_00147258	0.781379	3.03889e-08
TCONS_00149218	TCONS_00192743	0.707965	5.34151e-07
TCONS_00149218	TCONS_00257284	0.734543	2.02987e-07
TCONS_00149218	TCONS_00257289	0.711693	4.63535e-07
TCONS_00149218	TCONS_00309503	-0.712827	4.44147e-07
TCONS_00149750	TCONS_00053042	0.730816	2.31306e-07
TCONS_00149750	TCONS_00125968	0.718499	3.59797e-07
TCONS_00149750	TCONS_00143822	0.723361	3.01521e-07
TCONS_00149750	TCONS_00192743	0.755773	9.58344e-08
TCONS_00149750	TCONS_00208389	0.760959	7.87431e-08
TCONS_00149750	TCONS_00291739	0.761121	7.8248e-08
TCONS_00151283	TCONS_00081605	-0.734219	2.05298e-07
TCONS_00151283	TCONS_00176210	0.730978	2.29992e-07
TCONS_00151749	TCONS_00048105	0.789968	1.64675e-08
TCONS_00151749	TCONS_00048119	0.702293	6.6547e-07
TCONS_00151749	TCONS_00048123	0.724496	2.89478e-07
TCONS_00151749	TCONS_00053042	0.708127	5.30844e-07
TCONS_00151749	TCONS_00060556	-0.747346	1.29817e-07
TCONS_00151749	TCONS_00079848	0.767766	5.97081e-08
TCONS_00151749	TCONS_00089558	-0.783162	2.72443e-08
TCONS_00151749	TCONS_00103485	0.756584	9.2995e-08
TCONS_00151749	TCONS_00117112	0.876347	0
TCONS_00151749	TCONS_00117128	0.733247	2.12398e-07
TCONS_00151749	TCONS_00117132	0.725792	2.76358e-07
TCONS_00151749	TCONS_00125968	0.742971	1.51344e-07
TCONS_00151749	TCONS_00143822	0.783162	2.72443e-08
TCONS_00151749	TCONS_00147258	0.746374	1.3434e-07
TCONS_00151749	TCONS_00165584	0.735516	1.96215e-07
TCONS_00151749	TCONS_00168196	-0.825946	0
TCONS_00151749	TCONS_00174107	0.723199	3.03287e-07
TCONS_00151749	TCONS_00192743	0.86322	0
TCONS_00151749	TCONS_00208389	0.859169	0
TCONS_00151749	TCONS_00208398	0.7736	4.58924e-08
TCONS_00151749	TCONS_00208627	-0.7783	3.61647e-08
TCONS_00151749	TCONS_00284644	0.71542	4.03129e-07
TCONS_00151749	TCONS_00291739	0.850741	0
[truncated: 1,823 more rows]

## Sheet: Table S8_CD8_magenta
lncRNA	mRNA	correlation coefficient	p-value
TCONS_00009785	TCONS_00010811	0.714462	1.24564e-07
TCONS_00100824	TCONS_00010811	0.763429	5.37788e-09
TCONS_00123159	TCONS_00053042	0.700771	2.21978e-07
TCONS_00124364	TCONS_00053050	0.748134	2.3997e-08
TCONS_00124364	TCONS_00069584	0.702374	2.07464e-07
TCONS_00196507	TCONS_00010811	0.700401	2.25472e-07
TCONS_00196507	TCONS_00053050	0.739747	3.90331e-08
TCONS_00199439	TCONS_00010811	0.767006	2.23272e-09
TCONS_00218456	TCONS_00010811	0.7358	4.77488e-08
TCONS_00227442	TCONS_00010811	0.711872	1.39014e-07
TCONS_00227442	TCONS_00053050	0.802282	0
TCONS_00227442	TCONS_00069584	0.745051	2.90373e-08
TCONS_00276563	TCONS_00053050	0.744187	3.05445e-08
TCONS_00276563	TCONS_00069584	0.791551	0

## Sheet: Table S8_CD8_pink
lncRNA	mRNA	correlation coefficient	p-value
TCONS_00036389	TCONS_00040133	0.785507	0
TCONS_00036389	TCONS_00060421	-0.714585	1.23913e-07
TCONS_00036389	TCONS_00183611	-0.761702	7.03813e-09
TCONS_00036389	TCONS_00273473	-0.734813	5.01226e-08
TCONS_00036389	TCONS_00316461	-0.797965	0
TCONS_00052740	TCONS_00315620	-0.713969	1.27201e-07
TCONS_00083353	TCONS_00060413	0.718162	1.06368e-07
TCONS_00083353	TCONS_00071417	-0.735553	4.83346e-08
TCONS_00083353	TCONS_00168668	0.717175	1.10961e-07
TCONS_00083353	TCONS_00183609	0.740981	3.65447e-08
TCONS_00083353	TCONS_00224137	0.711502	1.41205e-07
TCONS_00149307	TCONS_00060421	-0.784521	0
TCONS_00149307	TCONS_00168678	-0.747641	2.4769e-08
TCONS_00149307	TCONS_00183611	-0.728153	6.85438e-08
TCONS_00149307	TCONS_00183614	-0.713599	1.29213e-07
TCONS_00149307	TCONS_00224140	-0.707431	1.67656e-07
TCONS_00149307	TCONS_00273473	-0.782917	0
TCONS_00149307	TCONS_00315620	-0.733087	5.44821e-08
TCONS_00149307	TCONS_00316461	-0.73876	4.11013e-08
TCONS_00149307	TCONS_00339492	-0.735553	4.83346e-08
TCONS_00185306	TCONS_00040131	0.857416	0
TCONS_00185306	TCONS_00040133	0.786494	0
TCONS_00185306	TCONS_00040137	0.811286	0
TCONS_00199717	TCONS_00040131	0.730496	6.15493e-08
TCONS_00199717	TCONS_00040133	0.710022	1.50312e-07
TCONS_00199717	TCONS_00224140	-0.726549	7.36905e-08
TCONS_00208998	TCONS_00060413	0.710762	1.4569e-07
TCONS_00212088	TCONS_00189577	0.747271	2.53563e-08
TCONS_00212088	TCONS_00315619	0.718779	1.03587e-07
TCONS_00316790	TCONS_00060413	0.751218	1.94488e-08

## Sheet: Table S8_CD8_red
lncRNA	mRNA	correlation coefficient	p-value
TCONS_00072030	TCONS_00159744	0.719396	1.00873e-07
TCONS_00072030	TCONS_00160840	0.708541	1.59994e-07
TCONS_00072030	TCONS_00160842	0.803022	0
TCONS_00072030	TCONS_00168678	0.765032	3.9205e-09
TCONS_00072030	TCONS_00183611	0.7749	0
TCONS_00072030	TCONS_00183614	0.790318	0
TCONS_00072030	TCONS_00224128	0.725069	7.8723e-08
TCONS_00072030	TCONS_00281719	0.711995	1.38291e-07
TCONS_00072030	TCONS_00281721	0.712982	1.32634e-07
TCONS_00072030	TCONS_00315620	0.722479	8.82378e-08
TCONS_00072030	TCONS_00316461	0.789948	0
TCONS_00072030	TCONS_00339492	0.740857	3.67888e-08
TCONS_00079524	TCONS_00159744	0.719149	1.01951e-07
TCONS_00079524	TCONS_00160842	0.730866	6.04987e-08
TCONS_00079524	TCONS_00168678	0.826704	0
TCONS_00079524	TCONS_00183611	0.803639	0
TCONS_00079524	TCONS_00183614	0.800432	0
TCONS_00079524	TCONS_00221558	0.723466	8.4502e-08
TCONS_00079524	TCONS_00224140	0.723713	8.35898e-08
TCONS_00079524	TCONS_00224146	0.708788	1.58339e-07
TCONS_00079524	TCONS_00316461	0.751958	1.84247e-08
TCONS_00083354	TCONS_00160842	0.712612	1.34729e-07
TCONS_00083354	TCONS_00168678	0.752205	1.80888e-08
TCONS_00083354	TCONS_00183611	0.804132	0
TCONS_00083354	TCONS_00183614	0.759112	9.71558e-09
TCONS_00083354	TCONS_00221558	0.776873	0
TCONS_00083354	TCONS_00224128	0.734813	5.01226e-08
TCONS_00083354	TCONS_00224140	0.775763	0
TCONS_00083354	TCONS_00224146	0.744311	3.03265e-08
TCONS_00083354	TCONS_00316461	0.746284	2.69586e-08
TCONS_00083354	TCONS_00339492	0.725563	7.70143e-08
TCONS_00103611	TCONS_00168678	0.763306	5.49329e-09
TCONS_00138143	TCONS_00224140	0.702004	2.10725e-07
TCONS_00138143	TCONS_00315620	0.716312	1.1513e-07
TCONS_00146448	TCONS_00168678	0.725069	7.8723e-08
TCONS_00146448	TCONS_00183609	-0.725316	7.78647e-08
TCONS_00146448	TCONS_00183611	0.777367	0
TCONS_00146448	TCONS_00183613	0.700894	2.20826e-07
TCONS_00146448	TCONS_00183614	0.773173	0
TCONS_00146448	TCONS_00224128	0.734197	5.16489e-08
TCONS_00146448	TCONS_00224137	-0.702251	2.08545e-07
TCONS_00146448	TCONS_00224146	0.760099	8.66824e-09
TCONS_00146448	TCONS_00339492	0.710268	1.48756e-07
TCONS_00151283	TCONS_00183614	0.715942	1.16961e-07
TCONS_00151283	TCONS_00339492	0.731237	5.94621e-08
TCONS_00170193	TCONS_00051950	0.721616	9.16249e-08
TCONS_00170193	TCONS_00159744	0.761085	7.65478e-09
TCONS_00170193	TCONS_00160840	0.711255	1.42685e-07
TCONS_00170193	TCONS_00160842	0.840641	0
TCONS_00170193	TCONS_00168678	0.799075	0
TCONS_00170193	TCONS_00183611	0.835708	0
TCONS_00170193	TCONS_00183614	0.762072	6.67421e-09
TCONS_00170193	TCONS_00221558	0.784767	0
TCONS_00170193	TCONS_00224128	0.739994	3.85269e-08
TCONS_00170193	TCONS_00224140	0.842738	0
TCONS_00170193	TCONS_00224146	0.725563	7.70143e-08
TCONS_00170193	TCONS_00281719	0.846809	0
TCONS_00170193	TCONS_00281721	0.713352	1.30571e-07
TCONS_00170193	TCONS_00316461	0.819056	0
TCONS_00170246	TCONS_00183609	-0.720876	9.46193e-08
TCONS_00174264	TCONS_00168678	0.725193	7.82928e-08
TCONS_00174264	TCONS_00183611	0.752575	1.75902e-08
TCONS_00183849	TCONS_00281719	0.704718	1.87956e-07
TCONS_00209004	TCONS_00159744	0.710392	1.47983e-07
TCONS_00209004	TCONS_00160840	0.729016	6.58966e-08
TCONS_00209004	TCONS_00160842	0.757015	1.20584e-08
TCONS_00209004	TCONS_00316461	0.77416	0
TCONS_00210058	TCONS_00159744	0.704965	1.86014e-07
TCONS_00210058	TCONS_00160842	0.751465	1.91047e-08
TCONS_00210058	TCONS_00183611	0.784767	0
TCONS_00210058	TCONS_00183614	0.708665	1.59164e-07
TCONS_00210058	TCONS_00281721	0.745914	2.75732e-08
TCONS_00210058	TCONS_00316461	0.73284	5.51271e-08
TCONS_00210058	TCONS_00339492	0.715942	1.16961e-07
TCONS_00232220	TCONS_00160842	0.751465	1.91047e-08
TCONS_00232220	TCONS_00168678	0.758495	1.03878e-08
TCONS_00232220	TCONS_00183611	0.819303	0
TCONS_00232220	TCONS_00221558	0.742091	3.43933e-08
TCONS_00232220	TCONS_00224140	0.737404	4.40629e-08
TCONS_00232220	TCONS_00281719	0.760839	7.90503e-09
TCONS_00232220	TCONS_00316461	0.77823	0
TCONS_00289854	TCONS_00160842	0.789824	0
TCONS_00289854	TCONS_00168678	0.810422	0
TCONS_00289854	TCONS_00183609	-0.766512	2.64402e-09
TCONS_00289854	TCONS_00183611	0.849645	0
TCONS_00289854	TCONS_00183614	0.851372	0
TCONS_00289854	TCONS_00224128	0.77786	0
TCONS_00289854	TCONS_00224137	-0.717299	1.10377e-07
TCONS_00289854	TCONS_00224140	0.789208	0
TCONS_00289854	TCONS_00224146	0.782054	0
TCONS_00289854	TCONS_00281719	0.724699	8.00256e-08
TCONS_00289854	TCONS_00315620	0.729756	6.36935e-08
TCONS_00289854	TCONS_00316461	0.798458	0
TCONS_00289854	TCONS_00339492	0.823127	0
TCONS_00296406	TCONS_00168678	0.740364	3.77757e-08
TCONS_00296406	TCONS_00183611	0.753068	1.69347e-08
TCONS_00296406	TCONS_00183614	0.706075	1.77517e-07
TCONS_00296406	TCONS_00224128	0.745791	2.77797e-08
TCONS_00296406	TCONS_00224146	0.726673	7.32836e-08
TCONS_00296406	TCONS_00339492	0.705335	1.83137e-07

## Sheet: Table S8_CD8_turquoise
lncRNA	mRNA	correlation coefficient	p-value
TCONS_00018322	TCONS_00035893	0.701388	2.16278e-07
TCONS_00018322	TCONS_00281721	0.710392	1.47983e-07
TCONS_00019355	TCONS_00005724	0.722973	8.63523e-08
TCONS_00019355	TCONS_00035893	0.726056	7.5337e-08
TCONS_00019355	TCONS_00139640	0.727783	6.97044e-08
TCONS_00019355	TCONS_00204636	0.746038	2.73675e-08
TCONS_00019355	TCONS_00252270	0.745421	2.84046e-08
TCONS_00019355	TCONS_00281721	0.732223	5.67648e-08
TCONS_00019355	TCONS_00285694	0.711255	1.42685e-07
TCONS_00019355	TCONS_00318580	0.782917	0
TCONS_00019355	TCONS_00318722	0.756398	1.27791e-08
TCONS_00019355	TCONS_00341241	0.713105	1.31943e-07
TCONS_00019357	TCONS_00005724	0.786001	0
TCONS_00019357	TCONS_00035893	0.78082	0
TCONS_00019357	TCONS_00048092	0.830404	0
TCONS_00019357	TCONS_00064285	0.805859	0
TCONS_00019357	TCONS_00064287	0.744187	3.05445e-08
TCONS_00019357	TCONS_00091138	0.717052	1.11548e-07
TCONS_00019357	TCONS_00139640	0.839285	0
TCONS_00019357	TCONS_00139645	0.812149	0
TCONS_00019357	TCONS_00159744	0.723466	8.4502e-08
TCONS_00019357	TCONS_00176205	0.744928	2.92499e-08
TCONS_00019357	TCONS_00176374	0.715695	1.18197e-07
TCONS_00019357	TCONS_00204636	0.821277	0
TCONS_00019357	TCONS_00209767	0.728276	6.81604e-08
TCONS_00019357	TCONS_00220768	0.765402	3.5953e-09
TCONS_00019357	TCONS_00248881	0.723589	8.40448e-08
TCONS_00019357	TCONS_00252270	0.788097	0
TCONS_00019357	TCONS_00281721	0.827937	0
TCONS_00019357	TCONS_00285694	0.748998	2.26763e-08
TCONS_00019357	TCONS_00318580	0.897379	0
TCONS_00019357	TCONS_00318722	0.835954	0
TCONS_00019357	TCONS_00318733	0.815233	0
TCONS_00019357	TCONS_00327826	0.73469	5.04252e-08
TCONS_00019357	TCONS_00341241	0.720012	9.82232e-08
TCONS_00028479	TCONS_00005724	0.709898	1.51097e-07
TCONS_00028479	TCONS_00125343	0.763676	5.14848e-09
TCONS_00028479	TCONS_00139645	0.705458	1.82188e-07
TCONS_00028479	TCONS_00159744	0.718286	1.05807e-07
TCONS_00028479	TCONS_00204636	0.704841	1.86982e-07
TCONS_00028479	TCONS_00209767	0.718286	1.05807e-07
TCONS_00028479	TCONS_00318722	0.710392	1.47983e-07
TCONS_00028484	TCONS_00139640	0.723096	8.58864e-08
TCONS_00028484	TCONS_00270593	0.734443	5.10344e-08
TCONS_00028485	TCONS_00005724	0.855936	0
TCONS_00028485	TCONS_00005727	0.728646	6.70208e-08
TCONS_00028485	TCONS_00010811	0.705088	1.8505e-07
TCONS_00028485	TCONS_00035893	0.788344	0
TCONS_00028485	TCONS_00048092	0.73284	5.51271e-08
TCONS_00028485	TCONS_00064285	0.751095	1.9622e-08
TCONS_00028485	TCONS_00064287	0.712118	1.37571e-07
TCONS_00028485	TCONS_00091138	0.757138	1.19161e-08
TCONS_00028485	TCONS_00125343	0.766636	2.54054e-09
TCONS_00028485	TCONS_00139640	0.726426	7.40993e-08
TCONS_00028485	TCONS_00139645	0.754425	1.51863e-08
TCONS_00028485	TCONS_00159744	0.849152	0
TCONS_00028485	TCONS_00160840	0.738144	4.24302e-08
TCONS_00028485	TCONS_00160842	0.772803	0
TCONS_00028485	TCONS_00167573	0.792661	0
TCONS_00028485	TCONS_00176205	0.798335	0
TCONS_00028485	TCONS_00181040	0.810052	0
TCONS_00028485	TCONS_00183611	0.704595	1.88935e-07
TCONS_00028485	TCONS_00204636	0.779463	0
TCONS_00028485	TCONS_00209767	0.832007	0
TCONS_00028485	TCONS_00220768	0.792168	0
TCONS_00028485	TCONS_00228074	0.787604	0
TCONS_00028485	TCONS_00252270	0.851002	0
TCONS_00028485	TCONS_00270593	0.73654	4.60219e-08
TCONS_00028485	TCONS_00270595	0.776133	0
TCONS_00028485	TCONS_00273473	0.704841	1.86982e-07
TCONS_00028485	TCONS_00278130	0.802652	0
TCONS_00028485	TCONS_00281721	0.831267	0
TCONS_00028485	TCONS_00285694	0.832747	0
TCONS_00028485	TCONS_00316461	0.790194	0
TCONS_00028485	TCONS_00318580	0.869257	0
TCONS_00028485	TCONS_00318722	0.845082	0
TCONS_00028485	TCONS_00318733	0.811286	0
TCONS_00028485	TCONS_00327818	0.717299	1.10377e-07
TCONS_00028485	TCONS_00327823	0.767499	1.82835e-09
TCONS_00028485	TCONS_00327826	0.747271	2.53563e-08
TCONS_00030965	TCONS_00139640	0.77379	0
TCONS_00030965	TCONS_00291741	0.701264	2.17406e-07
TCONS_00031572	TCONS_00204636	0.722479	8.82378e-08
TCONS_00031572	TCONS_00318580	0.711132	1.4343e-07
TCONS_00043676	TCONS_00005724	0.747394	2.51597e-08
TCONS_00043676	TCONS_00010811	0.722356	8.87148e-08
TCONS_00043676	TCONS_00035893	0.740611	3.72802e-08
TCONS_00043676	TCONS_00048092	0.758002	1.09356e-08
TCONS_00043676	TCONS_00064285	0.773543	0
TCONS_00043676	TCONS_00091138	0.714585	1.23913e-07
TCONS_00043676	TCONS_00139640	0.703854	1.94918e-07
TCONS_00043676	TCONS_00159744	0.792291	0
TCONS_00043676	TCONS_00160840	0.764909	4.02981e-09
TCONS_00043676	TCONS_00160842	0.786001	0
TCONS_00043676	TCONS_00176205	0.835708	0
TCONS_00043676	TCONS_00176374	0.725069	7.8723e-08
TCONS_00043676	TCONS_00183611	0.708541	1.59994e-07
TCONS_00043676	TCONS_00204636	0.864817	0
TCONS_00043676	TCONS_00209767	0.774036	0
TCONS_00043676	TCONS_00252270	0.786987	0
TCONS_00043676	TCONS_00270595	0.743941	3.09832e-08
TCONS_00043676	TCONS_00273473	0.731483	5.87787e-08
TCONS_00043676	TCONS_00281721	0.81918	0
TCONS_00043676	TCONS_00285694	0.748628	2.32377e-08
TCONS_00043676	TCONS_00316461	0.778353	0
TCONS_00043676	TCONS_00318580	0.751465	1.91047e-08
TCONS_00043676	TCONS_00318722	0.746284	2.69586e-08
TCONS_00043676	TCONS_00327823	0.750601	2.03216e-08
TCONS_00043676	TCONS_00327826	0.742337	3.39261e-08
TCONS_00043676	TCONS_00341241	0.722233	8.91941e-08
TCONS_00045169	TCONS_00281721	0.723713	8.35898e-08
TCONS_00046176	TCONS_00001897	0.704348	1.90909e-07
TCONS_00046176	TCONS_00005724	0.811409	0
TCONS_00046176	TCONS_00035893	0.78378	0
TCONS_00046176	TCONS_00048092	0.73839	4.18952e-08
TCONS_00046176	TCONS_00048117	0.751218	1.94488e-08
TCONS_00046176	TCONS_00057292	0.716805	1.1273e-07
TCONS_00046176	TCONS_00060421	0.702251	2.08545e-07
TCONS_00046176	TCONS_00064285	0.764539	4.36051e-09
TCONS_00046176	TCONS_00091138	0.714092	1.26536e-07
TCONS_00046176	TCONS_00139640	0.707061	1.7029e-07
TCONS_00046176	TCONS_00139645	0.744434	3.01094e-08
TCONS_00046176	TCONS_00159744	0.792908	0
TCONS_00046176	TCONS_00160840	0.752081	1.82564e-08
TCONS_00046176	TCONS_00160842	0.7786	0
TCONS_00046176	TCONS_00176205	0.774036	0
TCONS_00046176	TCONS_00176374	0.77934	0
TCONS_00046176	TCONS_00183611	0.714955	1.21979e-07
TCONS_00046176	TCONS_00204636	0.835708	0
TCONS_00046176	TCONS_00209767	0.781684	0
TCONS_00046176	TCONS_00220772	0.73913	4.03174e-08
TCONS_00046176	TCONS_00228074	0.710515	1.47215e-07
TCONS_00046176	TCONS_00252270	0.832501	0
TCONS_00046176	TCONS_00270595	0.800308	0
TCONS_00046176	TCONS_00273473	0.713969	1.27201e-07
TCONS_00046176	TCONS_00278130	0.712735	1.34027e-07
TCONS_00046176	TCONS_00281721	0.859636	0
TCONS_00046176	TCONS_00285694	0.791304	0
TCONS_00046176	TCONS_00316461	0.730126	6.26141e-08
TCONS_00046176	TCONS_00318580	0.847055	0
TCONS_00046176	TCONS_00318722	0.822633	0
TCONS_00046176	TCONS_00318733	0.708665	1.59164e-07
TCONS_00046176	TCONS_00327823	0.82288	0
TCONS_00046176	TCONS_00327826	0.731607	5.84393e-08
TCONS_00046176	TCONS_00341241	0.794635	0
TCONS_00046479	TCONS_00005724	0.776997	0
TCONS_00046479	TCONS_00064287	0.724576	8.04639e-08
TCONS_00046479	TCONS_00209767	0.72877	6.66443e-08
TCONS_00046479	TCONS_00252270	0.722356	8.87148e-08
TCONS_00046479	TCONS_00278130	0.700771	2.21978e-07
TCONS_00046479	TCONS_00285694	0.723959	8.26862e-08
TCONS_00046479	TCONS_00318580	0.718656	1.04138e-07
TCONS_00046479	TCONS_00318722	0.704224	1.91904e-07
TCONS_00051456	TCONS_00048092	0.752328	1.79219e-08
TCONS_00051456	TCONS_00064285	0.746901	2.5951e-08
TCONS_00051456	TCONS_00139640	0.741844	3.48644e-08
TCONS_00051456	TCONS_00141342	-0.78008	0
TCONS_00051456	TCONS_00204636	0.73543	4.86293e-08
TCONS_00052265	TCONS_00053049	0.726426	7.40993e-08
TCONS_00060410	TCONS_00001897	0.754055	1.56554e-08
TCONS_00060410	TCONS_00005724	0.743694	3.14257e-08
TCONS_00060410	TCONS_00035893	0.764786	4.13958e-09
TCONS_00060410	TCONS_00051950	0.756768	1.23449e-08
TCONS_00060410	TCONS_00057293	0.718779	1.03587e-07
TCONS_00060410	TCONS_00060421	0.803145	0
TCONS_00060410	TCONS_00159744	0.812026	0
TCONS_00060410	TCONS_00160840	0.806599	0
TCONS_00060410	TCONS_00160842	0.893802	0
TCONS_00060410	TCONS_00176205	0.840765	0
TCONS_00060410	TCONS_00183611	0.844218	0
TCONS_00060410	TCONS_00183614	0.763182	5.60919e-09
TCONS_00060410	TCONS_00204636	0.776503	0
TCONS_00060410	TCONS_00209767	0.794635	0
TCONS_00060410	TCONS_00220772	0.788591	0
TCONS_00060410	TCONS_00221558	0.712982	1.32634e-07
TCONS_00060410	TCONS_00224128	0.797965	0
TCONS_00060410	TCONS_00224140	0.837311	0
TCONS_00060410	TCONS_00224146	0.777613	0
TCONS_00060410	TCONS_00252270	0.7749	0
TCONS_00060410	TCONS_00270593	0.716065	1.16348e-07
TCONS_00060410	TCONS_00270595	0.842862	0
TCONS_00060410	TCONS_00273473	0.82473	0
TCONS_00060410	TCONS_00281719	0.803392	0
TCONS_00060410	TCONS_00281721	0.752328	1.79219e-08
TCONS_00060410	TCONS_00285694	0.72877	6.66443e-08
TCONS_00060410	TCONS_00316461	0.849152	0
TCONS_00060410	TCONS_00318580	0.700154	2.27832e-07
TCONS_00060410	TCONS_00318722	0.727783	6.97044e-08
TCONS_00060410	TCONS_00327823	0.861733	0
TCONS_00060410	TCONS_00327826	0.730743	6.08473e-08
TCONS_00060410	TCONS_00341241	0.750848	1.99704e-08
TCONS_00067043	TCONS_00001897	0.764046	4.80796e-09
TCONS_00068683	TCONS_00001904	0.713845	1.27868e-07
TCONS_00068683	TCONS_00204636	0.705211	1.84091e-07
TCONS_00072031	TCONS_00005724	0.799445	0
TCONS_00072031	TCONS_00005727	0.711132	1.4343e-07
TCONS_00072031	TCONS_00035893	0.754548	1.50312e-08
TCONS_00072031	TCONS_00048092	0.765402	3.5953e-09
TCONS_00072031	TCONS_00064285	0.791674	0
TCONS_00072031	TCONS_00139640	0.804502	0
TCONS_00072031	TCONS_00159744	0.758989	9.84893e-09
TCONS_00072031	TCONS_00160840	0.713352	1.30571e-07
TCONS_00072031	TCONS_00160842	0.745791	2.77797e-08
TCONS_00072031	TCONS_00176205	0.774406	0
TCONS_00072031	TCONS_00176374	0.758865	9.98283e-09
TCONS_00072031	TCONS_00204636	0.842121	0
TCONS_00072031	TCONS_00209767	0.766636	2.54054e-09
TCONS_00072031	TCONS_00221558	0.717175	1.10961e-07
TCONS_00072031	TCONS_00252270	0.811163	0
TCONS_00072031	TCONS_00270595	0.747394	2.51597e-08
TCONS_00072031	TCONS_00281721	0.859759	0
TCONS_00072031	TCONS_00285694	0.738514	4.16294e-08
TCONS_00072031	TCONS_00316461	0.726673	7.32836e-08
TCONS_00072031	TCONS_00318580	0.838545	0
TCONS_00072031	TCONS_00318722	0.77675	0
TCONS_00072031	TCONS_00318733	0.715079	1.21341e-07
TCONS_00072031	TCONS_00327818	0.703238	2.0005e-07
TCONS_00072031	TCONS_00327823	0.756768	1.23449e-08
TCONS_00072031	TCONS_00327826	0.744434	3.01094e-08
TCONS_00072032	TCONS_00273473	0.707678	1.65922e-07
TCONS_00074059	TCONS_00064285	0.710022	1.50312e-07
TCONS_00074059	TCONS_00176374	0.713105	1.31943e-07
TCONS_00075996	TCONS_00010811	0.736417	4.63066e-08
TCONS_00084231	TCONS_00064285	0.718902	1.03039e-07
TCONS_00084231	TCONS_00204636	0.704348	1.90909e-07
TCONS_00084231	TCONS_00248881	0.717792	1.0807e-07
TCONS_00084231	TCONS_00285694	0.712118	1.37571e-07
TCONS_00084231	TCONS_00318580	0.727043	7.2074e-08
TCONS_00084231	TCONS_00318722	0.714215	1.25876e-07
TCONS_00086635	TCONS_00005724	0.764292	4.5833e-09
TCONS_00086635	TCONS_00010811	0.784397	0
TCONS_00086635	TCONS_00010812	0.783287	0
TCONS_00086635	TCONS_00035885	0.712118	1.37571e-07
TCONS_00086635	TCONS_00035893	0.769843	0
TCONS_00086635	TCONS_00047366	0.716805	1.1273e-07
TCONS_00086635	TCONS_00060421	0.716435	1.14526e-07
TCONS_00086635	TCONS_00064287	0.809312	0
TCONS_00086635	TCONS_00091138	0.752945	1.70976e-08
TCONS_00086635	TCONS_00114944	0.812766	0
TCONS_00086635	TCONS_00125343	0.877521	0
TCONS_00086635	TCONS_00139645	0.735183	4.92227e-08
TCONS_00086635	TCONS_00159744	0.81659	0
TCONS_00086635	TCONS_00167573	0.782177	0
TCONS_00086635	TCONS_00176205	0.749738	2.15739e-08
TCONS_00086635	TCONS_00181040	0.818686	0
TCONS_00086635	TCONS_00204636	0.714339	1.25218e-07
TCONS_00086635	TCONS_00209767	0.813629	0
TCONS_00086635	TCONS_00220768	0.783534	0
TCONS_00086635	TCONS_00228074	0.798828	0
TCONS_00086635	TCONS_00252270	0.82066	0
TCONS_00086635	TCONS_00270595	0.734443	5.10344e-08
TCONS_00086635	TCONS_00278130	0.852112	0
TCONS_00086635	TCONS_00281721	0.719642	9.98053e-08
TCONS_00086635	TCONS_00285694	0.839901	0
TCONS_00086635	TCONS_00316461	0.73506	4.95214e-08
TCONS_00086635	TCONS_00318580	0.852482	0
TCONS_00086635	TCONS_00318722	0.821153	0
TCONS_00086635	TCONS_00318733	0.782177	0
TCONS_00086635	TCONS_00327826	0.734443	5.10344e-08
TCONS_00087703	TCONS_00139640	0.705705	1.80305e-07
TCONS_00091331	TCONS_00064287	0.706075	1.77517e-07
TCONS_00092475	TCONS_00064285	0.740611	3.72802e-08
TCONS_00092475	TCONS_00084219	0.73099	6.01516e-08
TCONS_00092475	TCONS_00204636	0.711132	1.4343e-07
TCONS_00096803	TCONS_00005724	0.767006	2.23272e-09
TCONS_00096803	TCONS_00035893	0.806846	0
TCONS_00096803	TCONS_00048092	0.785261	0
TCONS_00096803	TCONS_00048117	0.732963	5.48039e-08
TCONS_00096803	TCONS_00064285	0.77416	0
TCONS_00096803	TCONS_00139640	0.807832	0
TCONS_00096803	TCONS_00159744	0.739747	3.90331e-08
TCONS_00096803	TCONS_00160840	0.748628	2.32377e-08
TCONS_00096803	TCONS_00176205	0.789331	0
TCONS_00096803	TCONS_00176374	0.703608	1.96955e-07
TCONS_00096803	TCONS_00204636	0.836941	0
TCONS_00096803	TCONS_00209767	0.747394	2.51597e-08
TCONS_00096803	TCONS_00248881	0.720999	9.41142e-08
TCONS_00096803	TCONS_00252270	0.801295	0
TCONS_00096803	TCONS_00270595	0.713228	1.31255e-07
TCONS_00096803	TCONS_00281721	0.813876	0
TCONS_00096803	TCONS_00285694	0.762566	6.19596e-09
TCONS_00096803	TCONS_00318580	0.852976	0
TCONS_00096803	TCONS_00318722	0.82621	0
TCONS_00096803	TCONS_00318733	0.744681	2.96778e-08
TCONS_00096803	TCONS_00327823	0.754795	1.47229e-08
TCONS_00096803	TCONS_00341241	0.817453	0
TCONS_00096804	TCONS_00005724	0.73099	6.01516e-08
TCONS_00096804	TCONS_00035893	0.786001	0
TCONS_00096804	TCONS_00048092	0.797965	0
TCONS_00096804	TCONS_00057292	0.732223	5.67648e-08
TCONS_00096804	TCONS_00064285	0.8214	0
TCONS_00096804	TCONS_00139640	0.804379	0
TCONS_00096804	TCONS_00141342	-0.700648	2.23137e-07
TCONS_00096804	TCONS_00159744	0.716312	1.1513e-07
TCONS_00096804	TCONS_00160840	0.744804	2.94634e-08
TCONS_00096804	TCONS_00176205	0.754302	1.5342e-08
TCONS_00096804	TCONS_00176374	0.73802	4.26994e-08
TCONS_00096804	TCONS_00204636	0.845698	0
TCONS_00096804	TCONS_00209767	0.703361	1.99013e-07
TCONS_00096804	TCONS_00252270	0.796238	0
TCONS_00096804	TCONS_00270593	0.709158	1.55888e-07
TCONS_00096804	TCONS_00281721	0.829047	0
TCONS_00096804	TCONS_00285694	0.740364	3.77757e-08
TCONS_00096804	TCONS_00316454	0.73321	5.41617e-08
TCONS_00096804	TCONS_00318580	0.82658	0
TCONS_00096804	TCONS_00318722	0.763059	5.72557e-09
TCONS_00096804	TCONS_00318733	0.737404	4.40629e-08
TCONS_00096804	TCONS_00327823	0.747394	2.51597e-08
TCONS_00096804	TCONS_00341241	0.762936	5.84244e-09
TCONS_00100905	TCONS_00005724	0.743077	3.2548e-08
TCONS_00100905	TCONS_00064287	0.727783	6.97044e-08
TCONS_00100905	TCONS_00139645	0.765526	3.48781e-09
TCONS_00100905	TCONS_00318580	0.73469	5.04252e-08
TCONS_00100905	TCONS_00327818	0.714709	1.23265e-07
TCONS_00102934	TCONS_00005724	0.786371	0
TCONS_00102934	TCONS_00035893	0.711255	1.42685e-07
TCONS_00102934	TCONS_00159744	0.703361	1.99013e-07
TCONS_00102934	TCONS_00209767	0.757632	1.13524e-08
TCONS_00102934	TCONS_00252270	0.729263	6.51555e-08
TCONS_00102934	TCONS_00278130	0.7284	6.77788e-08
TCONS_00102934	TCONS_00285694	0.732963	5.48039e-08
TCONS_00102934	TCONS_00316461	0.710268	1.48756e-07
TCONS_00102934	TCONS_00318580	0.763922	4.92099e-09
TCONS_00102934	TCONS_00318722	0.758002	1.09356e-08
TCONS_00102934	TCONS_00327826	0.716559	1.13924e-07
TCONS_00102935	TCONS_00005724	0.721246	9.31113e-08
TCONS_00102935	TCONS_00048092	0.734073	5.19582e-08
TCONS_00102935	TCONS_00064285	0.837558	0
TCONS_00102935	TCONS_00139640	0.814123	0
TCONS_00102935	TCONS_00160840	0.707678	1.65922e-07
TCONS_00102935	TCONS_00176205	0.720999	9.41142e-08
TCONS_00102935	TCONS_00176374	0.805612	0
TCONS_00102935	TCONS_00204636	0.801418	0
TCONS_00102935	TCONS_00252270	0.745298	2.86146e-08
TCONS_00102935	TCONS_00281721	0.760099	8.66824e-09
TCONS_00102935	TCONS_00285694	0.703854	1.94918e-07
TCONS_00102935	TCONS_00316454	0.720999	9.41142e-08
TCONS_00102935	TCONS_00318580	0.768733	8.47163e-10
TCONS_00102935	TCONS_00318722	0.718779	1.03587e-07
TCONS_00102935	TCONS_00327823	0.719026	1.02494e-07
TCONS_00102943	TCONS_00064285	0.779587	0
TCONS_00102943	TCONS_00176205	0.729633	6.40565e-08
TCONS_00102943	TCONS_00176374	0.765402	3.5953e-09
TCONS_00102943	TCONS_00183611	0.746284	2.69586e-08
TCONS_00102943	TCONS_00204636	0.703484	1.97981e-07
TCONS_00102943	TCONS_00252270	0.712365	1.36143e-07
TCONS_00102943	TCONS_00273473	0.705458	1.82188e-07
TCONS_00102943	TCONS_00281721	0.719149	1.01951e-07
TCONS_00102943	TCONS_00327823	0.718286	1.05807e-07
TCONS_00102948	TCONS_00005724	0.726673	7.32836e-08
TCONS_00102948	TCONS_00035893	0.72766	7.00948e-08
TCONS_00102948	TCONS_00139640	0.806352	0
TCONS_00102948	TCONS_00176205	0.705951	1.78441e-07
TCONS_00102948	TCONS_00204636	0.706075	1.77517e-07
TCONS_00102948	TCONS_00209767	0.720382	9.66638e-08
TCONS_00102948	TCONS_00221558	0.740611	3.72802e-08
TCONS_00102948	TCONS_00252270	0.78119	0
TCONS_00102948	TCONS_00270595	0.718532	1.04692e-07
TCONS_00102948	TCONS_00285694	0.707431	1.67656e-07
TCONS_00102948	TCONS_00316454	0.713722	1.28539e-07
TCONS_00102948	TCONS_00318580	0.786617	0
TCONS_00102948	TCONS_00318722	0.713969	1.27201e-07
TCONS_00102948	TCONS_00327823	0.717052	1.11548e-07
TCONS_00102948	TCONS_00327826	0.702251	2.08545e-07
TCONS_00104350	TCONS_00035893	0.719766	9.92754e-08
TCONS_00104350	TCONS_00160842	0.763059	5.72557e-09
TCONS_00104350	TCONS_00220772	0.77638	0
TCONS_00104350	TCONS_00224140	0.73099	6.01516e-08
TCONS_00104350	TCONS_00270595	0.718656	1.04138e-07
TCONS_00104350	TCONS_00273473	0.748381	2.36158e-08
TCONS_00104350	TCONS_00281719	0.767376	1.9288e-09
TCONS_00104350	TCONS_00281721	0.741474	3.55785e-08
TCONS_00104350	TCONS_00327823	0.745174	2.88255e-08
TCONS_00104352	TCONS_00005724	0.731853	5.7765e-08
TCONS_00104352	TCONS_00035893	0.812766	0
TCONS_00104352	TCONS_00048117	0.72951	6.44212e-08
TCONS_00104352	TCONS_00064285	0.718779	1.03587e-07
TCONS_00104352	TCONS_00139640	0.738144	4.24302e-08
TCONS_00104352	TCONS_00159744	0.737404	4.40629e-08
TCONS_00104352	TCONS_00160840	0.774653	0
TCONS_00104352	TCONS_00160842	0.719766	9.92754e-08
TCONS_00104352	TCONS_00176205	0.770213	0
TCONS_00104352	TCONS_00176374	0.745421	2.84046e-08
TCONS_00104352	TCONS_00204636	0.792291	0
TCONS_00104352	TCONS_00209767	0.718162	1.06368e-07
TCONS_00104352	TCONS_00220772	0.72803	6.89289e-08
TCONS_00104352	TCONS_00252270	0.759235	9.58277e-09
TCONS_00104352	TCONS_00270593	0.742831	3.30035e-08
TCONS_00104352	TCONS_00270595	0.711008	1.4418e-07
TCONS_00104352	TCONS_00281721	0.776257	0
TCONS_00104352	TCONS_00316461	0.712858	1.33329e-07
TCONS_00104352	TCONS_00318580	0.749491	2.19384e-08
TCONS_00104352	TCONS_00318722	0.702991	2.0214e-07
TCONS_00104352	TCONS_00327823	0.77712	0
TCONS_00104352	TCONS_00327826	0.73247	5.61054e-08
TCONS_00104352	TCONS_00341241	0.791921	0
TCONS_00105005	TCONS_00064285	0.760962	7.77965e-09
TCONS_00105005	TCONS_00139640	0.7284	6.77788e-08
TCONS_00105005	TCONS_00204636	0.703484	1.97981e-07
TCONS_00110241	TCONS_00064285	0.739254	4.00584e-08
TCONS_00110241	TCONS_00139640	0.724576	8.04639e-08
TCONS_00110241	TCONS_00176374	0.722233	8.91941e-08
TCONS_00121933	TCONS_00176374	0.709158	1.55888e-07
TCONS_00125094	TCONS_00005724	0.742707	3.32327e-08
TCONS_00125094	TCONS_00035893	0.775393	0
TCONS_00125094	TCONS_00064285	0.718779	1.03587e-07
TCONS_00125094	TCONS_00159744	0.769843	0
TCONS_00125094	TCONS_00160840	0.73765	4.3514e-08
TCONS_00125094	TCONS_00160842	0.773296	0
TCONS_00125094	TCONS_00176205	0.787974	0
TCONS_00125094	TCONS_00183611	0.714462	1.24564e-07
TCONS_00125094	TCONS_00204636	0.82177	0
TCONS_00125094	TCONS_00209767	0.803269	0
TCONS_00125094	TCONS_00221558	0.729633	6.40565e-08
TCONS_00125094	TCONS_00228074	0.714215	1.25876e-07
TCONS_00125094	TCONS_00252270	0.788837	0
TCONS_00125094	TCONS_00270593	0.7321	5.70967e-08
TCONS_00125094	TCONS_00270595	0.756275	1.2925e-08
TCONS_00125094	TCONS_00273473	0.728276	6.81604e-08
TCONS_00125094	TCONS_00281719	0.705211	1.84091e-07
TCONS_00125094	TCONS_00281721	0.801418	0
TCONS_00125094	TCONS_00285694	0.752205	1.80888e-08
TCONS_00125094	TCONS_00316461	0.788837	0
TCONS_00125094	TCONS_00318580	0.738267	4.21621e-08
TCONS_00125094	TCONS_00318722	0.748504	2.34263e-08
TCONS_00125094	TCONS_00318733	0.709528	1.53474e-07
TCONS_00125094	TCONS_00327823	0.790934	0
TCONS_00125095	TCONS_00005727	0.730126	6.26141e-08
TCONS_00125095	TCONS_00327818	0.700894	2.20826e-07
TCONS_00126015	TCONS_00139640	0.720136	9.77009e-08
TCONS_00126015	TCONS_00318580	0.701018	2.1968e-07
TCONS_00127596	TCONS_00204636	0.750478	2.04984e-08
TCONS_00128572	TCONS_00001897	0.764786	4.13958e-09
TCONS_00128572	TCONS_00005724	0.737034	4.48953e-08
TCONS_00128572	TCONS_00035893	0.736294	4.65926e-08
TCONS_00128572	TCONS_00064285	0.741104	3.63016e-08
TCONS_00128572	TCONS_00139640	0.77342	0
TCONS_00128572	TCONS_00159744	0.755905	1.33662e-08
TCONS_00128572	TCONS_00160840	0.730003	6.29723e-08
TCONS_00128572	TCONS_00160842	0.803392	0
TCONS_00128572	TCONS_00176205	0.785137	0
TCONS_00128572	TCONS_00176374	0.720506	9.6149e-08
TCONS_00128572	TCONS_00183611	0.771816	0
TCONS_00128572	TCONS_00183614	0.73062	6.11975e-08
TCONS_00128572	TCONS_00204636	0.805982	0
TCONS_00128572	TCONS_00209767	0.72766	7.00948e-08
TCONS_00128572	TCONS_00220772	0.718409	1.05248e-07
TCONS_00128572	TCONS_00221558	0.719889	9.87481e-08
TCONS_00128572	TCONS_00224128	0.705951	1.78441e-07
TCONS_00128572	TCONS_00224140	0.758742	1.01173e-08
TCONS_00128572	TCONS_00252270	0.756275	1.2925e-08
TCONS_00128572	TCONS_00270593	0.705458	1.82188e-07
TCONS_00128572	TCONS_00270595	0.766389	2.74794e-09
TCONS_00128572	TCONS_00273473	0.725563	7.70143e-08
TCONS_00128572	TCONS_00281719	0.707555	1.66787e-07
TCONS_00128572	TCONS_00281721	0.836324	0
TCONS_00128572	TCONS_00316461	0.77749	0
TCONS_00128572	TCONS_00318580	0.72914	6.55252e-08
TCONS_00128572	TCONS_00318722	0.712488	1.35434e-07
TCONS_00128572	TCONS_00327823	0.802158	0
TCONS_00128572	TCONS_00327826	0.752205	1.80888e-08
TCONS_00130094	TCONS_00005724	0.7321	5.70967e-08
TCONS_00130094	TCONS_00035893	0.705335	1.83137e-07
TCONS_00130094	TCONS_00048092	0.759359	9.45051e-09
TCONS_00130094	TCONS_00064285	0.842492	0
TCONS_00130094	TCONS_00139640	0.789948	0
TCONS_00130094	TCONS_00176374	0.773913	0
TCONS_00130094	TCONS_00204636	0.818686	0
TCONS_00130094	TCONS_00252270	0.711378	1.41943e-07
TCONS_00130094	TCONS_00281721	0.780697	0
TCONS_00130094	TCONS_00318580	0.767499	1.82835e-09
TCONS_00130094	TCONS_00318722	0.708418	1.60828e-07
TCONS_00130094	TCONS_00327826	0.716312	1.1513e-07
TCONS_00130094	TCONS_00341241	0.740364	3.77757e-08
TCONS_00132253	TCONS_00005724	0.725686	7.6592e-08
TCONS_00132253	TCONS_00159744	0.747888	2.43814e-08
TCONS_00132253	TCONS_00160840	0.717669	1.08642e-07
TCONS_00132253	TCONS_00176205	0.705088	1.8505e-07
TCONS_00132253	TCONS_00209767	0.710515	1.47215e-07
TCONS_00132253	TCONS_00252270	0.723466	8.4502e-08
TCONS_00132253	TCONS_00316461	0.715695	1.18197e-07
TCONS_00132253	TCONS_00327823	0.712735	1.34027e-07
TCONS_00133549	TCONS_00139640	0.706198	1.76597e-07
TCONS_00133549	TCONS_00316454	0.722849	8.68203e-08
TCONS_00133983	TCONS_00001897	0.705088	1.8505e-07
TCONS_00133983	TCONS_00005724	0.857539	0
TCONS_00133983	TCONS_00005727	0.760839	7.90503e-09
TCONS_00133983	TCONS_00035893	0.881098	0
TCONS_00133983	TCONS_00048092	0.77749	0
TCONS_00133983	TCONS_00060421	0.706321	1.75682e-07
TCONS_00133983	TCONS_00064285	0.748874	2.28626e-08
TCONS_00133983	TCONS_00064287	0.761702	7.03813e-09
TCONS_00133983	TCONS_00091138	0.735924	4.74579e-08
TCONS_00133983	TCONS_00114944	0.745421	2.84046e-08
TCONS_00133983	TCONS_00125343	0.82584	0
TCONS_00133983	TCONS_00139640	0.73543	4.86293e-08
TCONS_00133983	TCONS_00159744	0.866543	0
TCONS_00133983	TCONS_00160840	0.850632	0
TCONS_00133983	TCONS_00160842	0.795005	0
TCONS_00133983	TCONS_00167573	0.719396	1.00873e-07
TCONS_00133983	TCONS_00172264	0.702251	2.08545e-07
TCONS_00133983	TCONS_00176205	0.877521	0
TCONS_00133983	TCONS_00176374	0.725933	7.57534e-08
TCONS_00133983	TCONS_00181040	0.726673	7.32836e-08
TCONS_00133983	TCONS_00204636	0.853716	0
TCONS_00133983	TCONS_00209767	0.856553	0
TCONS_00133983	TCONS_00220768	0.822633	0
TCONS_00133983	TCONS_00228074	0.785384	0
TCONS_00133983	TCONS_00248881	0.719149	1.01951e-07
TCONS_00133983	TCONS_00252270	0.90515	0
TCONS_00133983	TCONS_00270593	0.77564	0
TCONS_00133983	TCONS_00270595	0.840395	0
TCONS_00133983	TCONS_00278130	0.752821	1.72611e-08
TCONS_00133983	TCONS_00281721	0.82214	0
TCONS_00133983	TCONS_00285694	0.854456	0
TCONS_00133983	TCONS_00316461	0.782794	0
TCONS_00133983	TCONS_00318580	0.929941	0
TCONS_00133983	TCONS_00318722	0.921677	0
TCONS_00133983	TCONS_00318733	0.810792	0
TCONS_00133983	TCONS_00327823	0.799445	0
TCONS_00133983	TCONS_00327826	0.801048	0
TCONS_00133983	TCONS_00341241	0.854949	0
TCONS_00133990	TCONS_00005724	0.753808	1.59713e-08
TCONS_00133990	TCONS_00010811	0.723343	8.49613e-08
TCONS_00133990	TCONS_00010812	0.721369	9.26135e-08
TCONS_00133990	TCONS_00035893	0.750848	1.99704e-08
TCONS_00133990	TCONS_00064285	0.721246	9.31113e-08
TCONS_00133990	TCONS_00064287	0.726179	7.49225e-08
TCONS_00133990	TCONS_00114944	0.726056	7.5337e-08
TCONS_00133990	TCONS_00125343	0.791181	0
TCONS_00133990	TCONS_00159744	0.794141	0
TCONS_00133990	TCONS_00160840	0.769596	1.85014e-10
TCONS_00133990	TCONS_00160842	0.726303	7.45099e-08
TCONS_00133990	TCONS_00167573	0.73136	5.91196e-08
TCONS_00133990	TCONS_00167578	0.705581	1.81244e-07
TCONS_00133990	TCONS_00176205	0.759235	9.58277e-09
TCONS_00133990	TCONS_00176374	0.723959	8.26862e-08
TCONS_00133990	TCONS_00204636	0.718039	1.06933e-07
TCONS_00133990	TCONS_00209767	0.806846	0
TCONS_00133990	TCONS_00221558	0.702868	2.03194e-07
TCONS_00133990	TCONS_00228074	0.784644	0
TCONS_00133990	TCONS_00252270	0.833858	0
TCONS_00133990	TCONS_00270595	0.774776	0
TCONS_00133990	TCONS_00278130	0.787604	0
TCONS_00133990	TCONS_00281721	0.747641	2.4769e-08
TCONS_00133990	TCONS_00285694	0.835091	0
TCONS_00133990	TCONS_00316461	0.774036	0
TCONS_00133990	TCONS_00318580	0.767746	1.62874e-09
TCONS_00133990	TCONS_00318722	0.769843	0
TCONS_00133990	TCONS_00327823	0.744928	2.92499e-08
TCONS_00133990	TCONS_00327826	0.730373	6.19026e-08
TCONS_00133993	TCONS_00064287	0.708665	1.59164e-07
TCONS_00133993	TCONS_00176205	0.73654	4.60219e-08
TCONS_00133993	TCONS_00204636	0.752575	1.75902e-08
TCONS_00133993	TCONS_00252270	0.709898	1.51097e-07
TCONS_00133993	TCONS_00281721	0.724453	8.09042e-08
TCONS_00133993	TCONS_00285694	0.726426	7.40993e-08
TCONS_00133993	TCONS_00318580	0.742214	3.41592e-08
TCONS_00133993	TCONS_00318722	0.774653	0
TCONS_00133993	TCONS_00341241	0.737034	4.48953e-08
TCONS_00134147	TCONS_00064285	0.720259	9.71811e-08
TCONS_00134147	TCONS_00204636	0.709282	1.55079e-07
TCONS_00134147	TCONS_00291736	0.73469	5.04252e-08
TCONS_00134853	TCONS_00060421	0.722479	8.82378e-08
TCONS_00134853	TCONS_00159744	0.724329	8.13466e-08
TCONS_00134853	TCONS_00160842	0.701634	2.14039e-07
TCONS_00134853	TCONS_00176205	0.715819	1.17578e-07
TCONS_00134853	TCONS_00209767	0.728893	6.62696e-08
TCONS_00134853	TCONS_00221558	0.702128	2.09632e-07
TCONS_00134853	TCONS_00252270	0.735307	4.89254e-08
TCONS_00134853	TCONS_00270595	0.712612	1.34729e-07
TCONS_00134853	TCONS_00316461	0.719026	1.02494e-07
TCONS_00135235	TCONS_00001904	0.749861	2.13928e-08
TCONS_00135235	TCONS_00053042	0.721369	9.26135e-08
TCONS_00136682	TCONS_00139640	0.787727	0
TCONS_00137493	TCONS_00005727	0.708418	1.60828e-07
TCONS_00137493	TCONS_00248881	0.72914	6.55252e-08
TCONS_00137517	TCONS_00064285	0.704101	1.92903e-07
TCONS_00137517	TCONS_00183611	0.707308	1.68529e-07
TCONS_00137517	TCONS_00204636	0.715942	1.16961e-07
TCONS_00137517	TCONS_00252270	0.757755	1.12129e-08
TCONS_00137517	TCONS_00281721	0.760099	8.66824e-09
TCONS_00137517	TCONS_00285694	0.707431	1.67656e-07
TCONS_00137517	TCONS_00318580	0.718656	1.04138e-07
TCONS_00137517	TCONS_00327823	0.745914	2.75732e-08
TCONS_00139482	TCONS_00139640	0.713105	1.31943e-07
TCONS_00139482	TCONS_00316454	0.700524	2.24301e-07
TCONS_00140580	TCONS_00053052	0.734197	5.16489e-08
TCONS_00140586	TCONS_00001897	0.721739	9.11341e-08
TCONS_00140586	TCONS_00001904	0.741104	3.63016e-08
TCONS_00140586	TCONS_00005724	0.749738	2.15739e-08
TCONS_00140586	TCONS_00035893	0.802405	0
TCONS_00140586	TCONS_00048092	0.780327	0
TCONS_00140586	TCONS_00064285	0.786494	0
TCONS_00140586	TCONS_00091138	0.707431	1.67656e-07
TCONS_00140586	TCONS_00139640	0.835708	0
TCONS_00140586	TCONS_00141342	-0.706691	1.72965e-07
TCONS_00140586	TCONS_00159744	0.731237	5.94621e-08
TCONS_00140586	TCONS_00160840	0.733827	5.25808e-08
TCONS_00140586	TCONS_00176205	0.777243	0
TCONS_00140586	TCONS_00176374	0.711748	1.39741e-07
TCONS_00140586	TCONS_00204636	0.857416	0
TCONS_00140586	TCONS_00209767	0.707678	1.65922e-07
TCONS_00140586	TCONS_00220768	0.701511	2.15155e-07
TCONS_00140586	TCONS_00248881	0.718902	1.03039e-07
TCONS_00140586	TCONS_00252270	0.770089	0
TCONS_00140586	TCONS_00270593	0.702004	2.10725e-07
TCONS_00140586	TCONS_00281721	0.814493	0
TCONS_00140586	TCONS_00285694	0.711625	1.40471e-07
TCONS_00140586	TCONS_00318580	0.833981	0
TCONS_00140586	TCONS_00318722	0.787727	0
TCONS_00140586	TCONS_00318733	0.753562	1.62898e-08
TCONS_00140586	TCONS_00327826	0.745421	2.84046e-08
TCONS_00140586	TCONS_00341241	0.820167	0
TCONS_00145972	TCONS_00005724	0.708295	1.61666e-07
TCONS_00145972	TCONS_00048092	0.751095	1.9622e-08
TCONS_00145972	TCONS_00064285	0.831761	0
TCONS_00145972	TCONS_00139640	0.842368	0
TCONS_00145972	TCONS_00176374	0.7358	4.77488e-08
TCONS_00145972	TCONS_00204636	0.734567	5.07291e-08
TCONS_00145972	TCONS_00252270	0.714955	1.21979e-07
TCONS_00145972	TCONS_00281721	0.749368	2.21217e-08
TCONS_00145972	TCONS_00316454	0.718286	1.05807e-07
TCONS_00145972	TCONS_00318580	0.752945	1.70976e-08
TCONS_00145974	TCONS_00005724	0.750355	2.06758e-08
TCONS_00145974	TCONS_00035893	0.726179	7.49225e-08
TCONS_00145974	TCONS_00048092	0.794265	0
TCONS_00145974	TCONS_00064285	0.786371	0
TCONS_00145974	TCONS_00139640	0.849769	0
TCONS_00145974	TCONS_00139645	0.713228	1.31255e-07
TCONS_00145974	TCONS_00176205	0.730003	6.29723e-08
TCONS_00145974	TCONS_00176374	0.702621	2.05317e-07
TCONS_00145974	TCONS_00204636	0.765526	3.48781e-09
TCONS_00145974	TCONS_00209767	0.711995	1.38291e-07
TCONS_00145974	TCONS_00248881	0.718409	1.05248e-07
TCONS_00145974	TCONS_00252270	0.751218	1.94488e-08
TCONS_00145974	TCONS_00281721	0.786987	0
TCONS_00145974	TCONS_00285694	0.704224	1.91904e-07
TCONS_00145974	TCONS_00316454	0.711872	1.39014e-07
TCONS_00145974	TCONS_00318580	0.802405	0
TCONS_00145974	TCONS_00318722	0.749121	2.24907e-08
TCONS_00145974	TCONS_00318733	0.787111	0
TCONS_00145974	TCONS_00327826	0.713599	1.29213e-07
TCONS_00148120	TCONS_00005724	0.739624	3.92878e-08
TCONS_00148120	TCONS_00010811	0.797348	0
TCONS_00148120	TCONS_00091138	0.770953	0
TCONS_00148120	TCONS_00159744	0.758865	9.98283e-09
TCONS_00148120	TCONS_00167573	0.722109	8.96756e-08
TCONS_00148120	TCONS_00176205	0.711008	1.4418e-07
TCONS_00148120	TCONS_00181040	0.703731	1.95934e-07
TCONS_00148120	TCONS_00209767	0.757755	1.12129e-08
TCONS_00148120	TCONS_00252270	0.742091	3.43933e-08
TCONS_00148120	TCONS_00270595	0.704348	1.90909e-07
TCONS_00148120	TCONS_00278130	0.760592	8.15734e-09
TCONS_00148120	TCONS_00285694	0.791304	0
TCONS_00148120	TCONS_00316461	0.73099	6.01516e-08
TCONS_00148120	TCONS_00318580	0.726056	7.5337e-08
TCONS_00148120	TCONS_00318722	0.766142	2.9571e-09
TCONS_00148120	TCONS_00327818	0.747394	2.51597e-08
TCONS_00148121	TCONS_00005724	0.766389	2.74794e-09
TCONS_00148121	TCONS_00035893	0.749121	2.24907e-08
TCONS_00148121	TCONS_00048092	0.701758	2.12929e-07
TCONS_00148121	TCONS_00064285	0.815479	0
TCONS_00148121	TCONS_00091138	0.725193	7.82928e-08
TCONS_00148121	TCONS_00139640	0.727906	6.93158e-08
TCONS_00148121	TCONS_00159744	0.742831	3.30035e-08
TCONS_00148121	TCONS_00160840	0.708171	1.62508e-07
TCONS_00148121	TCONS_00176205	0.73173	5.81014e-08
TCONS_00148121	TCONS_00176374	0.778107	0
TCONS_00148121	TCONS_00204636	0.835584	0
TCONS_00148121	TCONS_00209767	0.744434	3.01094e-08
TCONS_00148121	TCONS_00252270	0.78415	0
TCONS_00148121	TCONS_00270593	0.742214	3.41592e-08
TCONS_00148121	TCONS_00281721	0.798705	0
TCONS_00148121	TCONS_00285694	0.766266	2.8523e-09
TCONS_00148121	TCONS_00318580	0.797225	0
TCONS_00148121	TCONS_00318722	0.77268	0
TCONS_00148121	TCONS_00327823	0.702744	2.04253e-07
TCONS_00148121	TCONS_00327826	0.708048	1.63355e-07
TCONS_00148121	TCONS_00341241	0.740734	3.7034e-08
TCONS_00148122	TCONS_00139640	0.767623	1.72833e-09
TCONS_00152093	TCONS_00064285	0.705705	1.80305e-07
TCONS_00161525	TCONS_00318580	0.706321	1.75682e-07
TCONS_00161559	TCONS_00005724	0.72914	6.55252e-08
TCONS_00161559	TCONS_00035893	0.709405	1.54274e-07
TCONS_00161559	TCONS_00125343	0.73876	4.11013e-08
TCONS_00161559	TCONS_00159744	0.763922	4.92099e-09
TCONS_00161559	TCONS_00160840	0.718656	1.04138e-07
TCONS_00161559	TCONS_00160842	0.721739	9.11341e-08
TCONS_00161559	TCONS_00176205	0.754425	1.51863e-08
TCONS_00161559	TCONS_00176374	0.740981	3.65447e-08
TCONS_00161559	TCONS_00204636	0.775393	0
TCONS_00161559	TCONS_00209767	0.746161	2.71626e-08
TCONS_00161559	TCONS_00220768	0.764786	4.13958e-09
TCONS_00161559	TCONS_00252270	0.797101	0
TCONS_00161559	TCONS_00270595	0.756152	1.30715e-08
TCONS_00161559	TCONS_00281721	0.721739	9.11341e-08
TCONS_00161559	TCONS_00285694	0.77231	0
TCONS_00161559	TCONS_00316461	0.707431	1.67656e-07
TCONS_00161559	TCONS_00318580	0.767376	1.9288e-09
TCONS_00161559	TCONS_00318722	0.752945	1.70976e-08
TCONS_00161559	TCONS_00341241	0.712365	1.36143e-07
TCONS_00169330	TCONS_00005724	0.793525	0
TCONS_00169330	TCONS_00035893	0.755782	1.35145e-08
TCONS_00169330	TCONS_00048092	0.737897	4.29698e-08
TCONS_00169330	TCONS_00064285	0.751711	1.87633e-08
TCONS_00169330	TCONS_00139640	0.772926	0
TCONS_00169330	TCONS_00176205	0.705581	1.81244e-07
TCONS_00169330	TCONS_00204636	0.763182	5.60919e-09
TCONS_00169330	TCONS_00252270	0.726426	7.40993e-08
TCONS_00169330	TCONS_00281721	0.710885	1.44933e-07
TCONS_00169330	TCONS_00318580	0.789824	0
TCONS_00169330	TCONS_00318719	0.722479	8.82378e-08
TCONS_00169330	TCONS_00318722	0.722109	8.96756e-08
TCONS_00169330	TCONS_00327826	0.777613	0
TCONS_00169808	TCONS_00204636	0.717422	1.09796e-07
TCONS_00169812	TCONS_00005724	0.81733	0
TCONS_00169812	TCONS_00035893	0.784644	0
TCONS_00169812	TCONS_00060421	0.73284	5.51271e-08
TCONS_00169812	TCONS_00064285	0.706568	1.73866e-07
TCONS_00169812	TCONS_00091138	0.716929	1.12138e-07
TCONS_00169812	TCONS_00159744	0.82177	0
TCONS_00169812	TCONS_00160840	0.72988	6.33321e-08
TCONS_00169812	TCONS_00160842	0.782794	0
TCONS_00169812	TCONS_00176205	0.810546	0
TCONS_00169812	TCONS_00176374	0.700154	2.27832e-07
TCONS_00169812	TCONS_00183611	0.745914	2.75732e-08
TCONS_00169812	TCONS_00204636	0.792414	0
TCONS_00169812	TCONS_00209767	0.843478	0
TCONS_00169812	TCONS_00221558	0.746038	2.73675e-08
TCONS_00169812	TCONS_00228074	0.787851	0
TCONS_00169812	TCONS_00252270	0.836324	0
TCONS_00169812	TCONS_00270593	0.716189	1.15738e-07
TCONS_00169812	TCONS_00270595	0.798458	0
TCONS_00169812	TCONS_00273473	0.738267	4.21621e-08
TCONS_00169812	TCONS_00278130	0.795991	0
TCONS_00169812	TCONS_00281719	0.72914	6.55252e-08
TCONS_00169812	TCONS_00281721	0.77786	0
TCONS_00169812	TCONS_00285694	0.811779	0
TCONS_00169812	TCONS_00316461	0.807586	0
TCONS_00169812	TCONS_00318580	0.829911	0
TCONS_00169812	TCONS_00318722	0.797595	0
TCONS_00169812	TCONS_00318733	0.78119	0
TCONS_00169812	TCONS_00327818	0.725439	7.74385e-08
TCONS_00169812	TCONS_00327823	0.791428	0
TCONS_00169812	TCONS_00327826	0.758002	1.09356e-08
TCONS_00175215	TCONS_00176374	0.725933	7.57534e-08
TCONS_00175215	TCONS_00204636	0.745174	2.88255e-08
TCONS_00176373	TCONS_00053052	0.700894	2.20826e-07
TCONS_00177463	TCONS_00341241	0.700648	2.23137e-07
TCONS_00180230	TCONS_00048092	0.714955	1.21979e-07
TCONS_00182041	TCONS_00001904	0.725439	7.74385e-08
TCONS_00194155	TCONS_00176374	0.702621	2.05317e-07
TCONS_00198658	TCONS_00005724	0.701018	2.1968e-07
TCONS_00198658	TCONS_00064287	0.738144	4.24302e-08
TCONS_00198658	TCONS_00139645	0.7786	0
TCONS_00198658	TCONS_00139646	0.703731	1.95934e-07
TCONS_00198658	TCONS_00248881	0.774653	0
TCONS_00198658	TCONS_00318580	0.733457	5.35252e-08
TCONS_00198658	TCONS_00318722	0.73025	6.22576e-08
TCONS_00201623	TCONS_00005724	0.815109	0
TCONS_00201623	TCONS_00005727	0.710392	1.47983e-07
TCONS_00201623	TCONS_00035893	0.808942	0
TCONS_00201623	TCONS_00048092	0.840518	0
TCONS_00201623	TCONS_00064285	0.799198	0
TCONS_00201623	TCONS_00091138	0.759359	9.45051e-09
TCONS_00201623	TCONS_00125343	0.707308	1.68529e-07
TCONS_00201623	TCONS_00139640	0.800432	0
TCONS_00201623	TCONS_00139645	0.740981	3.65447e-08
TCONS_00201623	TCONS_00159744	0.767253	2.02967e-09
TCONS_00201623	TCONS_00160840	0.717792	1.0807e-07
TCONS_00201623	TCONS_00160842	0.737897	4.29698e-08
TCONS_00201623	TCONS_00176205	0.790934	0
TCONS_00201623	TCONS_00176374	0.760099	8.66824e-09
TCONS_00201623	TCONS_00204636	0.854332	0
TCONS_00201623	TCONS_00209767	0.773543	0
TCONS_00201623	TCONS_00220768	0.709035	1.567e-07
TCONS_00201623	TCONS_00221558	0.73728	4.43392e-08
TCONS_00201623	TCONS_00228074	0.729016	6.58966e-08
TCONS_00201623	TCONS_00252270	0.831884	0
TCONS_00201623	TCONS_00270595	0.751341	1.92764e-08
TCONS_00201623	TCONS_00281721	0.86753	0
TCONS_00201623	TCONS_00285694	0.747271	2.53563e-08
TCONS_00201623	TCONS_00316461	0.714092	1.26536e-07
TCONS_00201623	TCONS_00318580	0.880111	0
TCONS_00201623	TCONS_00318722	0.801418	0
TCONS_00201623	TCONS_00318733	0.800432	0
TCONS_00201623	TCONS_00327823	0.758125	1.07978e-08
TCONS_00201623	TCONS_00327826	0.790318	0
TCONS_00201623	TCONS_00341241	0.737897	4.29698e-08
TCONS_00201631	TCONS_00001897	0.701634	2.14039e-07
TCONS_00201631	TCONS_00005724	0.780327	0
TCONS_00201631	TCONS_00035893	0.777613	0
TCONS_00201631	TCONS_00048092	0.811903	0
TCONS_00201631	TCONS_00064285	0.783534	0
TCONS_00201631	TCONS_00091138	0.753315	1.6611e-08
TCONS_00201631	TCONS_00139640	0.784521	0
TCONS_00201631	TCONS_00139645	0.749985	2.12125e-08
TCONS_00201631	TCONS_00159744	0.77379	0
TCONS_00201631	TCONS_00160840	0.720999	9.41142e-08
TCONS_00201631	TCONS_00160842	0.73506	4.95214e-08
TCONS_00201631	TCONS_00176205	0.789208	0
TCONS_00201631	TCONS_00176374	0.718902	1.03039e-07
TCONS_00201631	TCONS_00204636	0.874191	0
TCONS_00201631	TCONS_00209767	0.759482	9.31879e-09
TCONS_00201631	TCONS_00252270	0.810792	0
TCONS_00201631	TCONS_00270595	0.741597	3.53394e-08
TCONS_00201631	TCONS_00281721	0.901203	0
TCONS_00201631	TCONS_00285694	0.740981	3.65447e-08
TCONS_00201631	TCONS_00316461	0.713845	1.27868e-07
TCONS_00201631	TCONS_00318580	0.839408	0
TCONS_00201631	TCONS_00318722	0.789948	0
TCONS_00201631	TCONS_00318733	0.73839	4.18952e-08
TCONS_00201631	TCONS_00327818	0.718902	1.03039e-07
TCONS_00201631	TCONS_00327823	0.754548	1.50312e-08
TCONS_00201631	TCONS_00327826	0.764909	4.02981e-09
TCONS_00201631	TCONS_00341241	0.759359	9.45051e-09
TCONS_00201892	TCONS_00001897	0.700154	2.27832e-07
TCONS_00201892	TCONS_00176205	0.725686	7.6592e-08
TCONS_00201892	TCONS_00204636	0.713722	1.28539e-07
TCONS_00201892	TCONS_00220772	0.748134	2.3997e-08
TCONS_00201892	TCONS_00281721	0.733703	5.28942e-08
TCONS_00201892	TCONS_00327823	0.721492	9.2118e-08
TCONS_00201892	TCONS_00341241	0.733087	5.44821e-08
TCONS_00201896	TCONS_00005724	0.73321	5.41617e-08
TCONS_00201896	TCONS_00035893	0.722726	8.72906e-08
TCONS_00201896	TCONS_00048092	0.803022	0
TCONS_00201896	TCONS_00064285	0.758495	1.03878e-08
TCONS_00201896	TCONS_00064287	0.709158	1.55888e-07
TCONS_00201896	TCONS_00125343	0.725316	7.78647e-08
TCONS_00201896	TCONS_00139645	0.712365	1.36143e-07
TCONS_00201896	TCONS_00204636	0.81918	0
TCONS_00201896	TCONS_00252270	0.727166	7.16746e-08
TCONS_00201896	TCONS_00281721	0.767253	2.02967e-09
TCONS_00201896	TCONS_00318580	0.800432	0
TCONS_00201896	TCONS_00318722	0.757632	1.13524e-08
TCONS_00204972	TCONS_00005724	0.755042	1.44171e-08
TCONS_00204972	TCONS_00035893	0.768486	1.04005e-09
TCONS_00204972	TCONS_00139640	0.767129	2.13098e-09
TCONS_00204972	TCONS_00176205	0.710762	1.4569e-07
TCONS_00204972	TCONS_00204636	0.703114	2.01092e-07
TCONS_00204972	TCONS_00252270	0.724699	8.00256e-08
TCONS_00204972	TCONS_00270593	0.724699	8.00256e-08
TCONS_00204972	TCONS_00318580	0.762566	6.19596e-09
TCONS_00204972	TCONS_00318722	0.702251	2.08545e-07
TCONS_00204972	TCONS_00327826	0.771693	0
TCONS_00206306	TCONS_00291728	0.700401	2.25472e-07
TCONS_00207631	TCONS_00005724	0.758495	1.03878e-08
TCONS_00207631	TCONS_00035893	0.755905	1.33662e-08
TCONS_00207631	TCONS_00048092	0.821153	0
TCONS_00207631	TCONS_00048117	0.708048	1.63355e-07
TCONS_00207631	TCONS_00064285	0.782917	0
TCONS_00207631	TCONS_00139640	0.803639	0
TCONS_00207631	TCONS_00139645	0.758002	1.09356e-08
TCONS_00207631	TCONS_00159744	0.721986	9.01595e-08
TCONS_00207631	TCONS_00160840	0.707185	1.69407e-07
TCONS_00207631	TCONS_00176205	0.736787	4.54562e-08
TCONS_00207631	TCONS_00176374	0.722603	8.77631e-08
TCONS_00207631	TCONS_00204636	0.854086	0
TCONS_00207631	TCONS_00209767	0.710392	1.47983e-07
TCONS_00207631	TCONS_00220768	0.718409	1.05248e-07
TCONS_00207631	TCONS_00252270	0.784644	0
TCONS_00207631	TCONS_00281721	0.850509	0
TCONS_00207631	TCONS_00285694	0.718532	1.04692e-07
TCONS_00207631	TCONS_00318580	0.858773	0
TCONS_00207631	TCONS_00318722	0.798952	0
TCONS_00207631	TCONS_00318733	0.78193	0
TCONS_00207631	TCONS_00327823	0.716929	1.12138e-07
TCONS_00207631	TCONS_00341241	0.769596	1.85014e-10
TCONS_00209002	TCONS_00160840	0.720506	9.6149e-08
TCONS_00209002	TCONS_00273473	0.720999	9.41142e-08
TCONS_00209002	TCONS_00316461	0.7395	3.95435e-08
TCONS_00211199	TCONS_00001904	0.734813	5.01226e-08
TCONS_00211199	TCONS_00204636	0.718162	1.06368e-07
TCONS_00215612	TCONS_00057292	0.728893	6.62696e-08
TCONS_00215612	TCONS_00160840	0.749615	2.17558e-08
TCONS_00215612	TCONS_00160842	0.726056	7.5337e-08
TCONS_00215612	TCONS_00176205	0.755782	1.35145e-08
TCONS_00215612	TCONS_00176374	0.785014	0
TCONS_00215612	TCONS_00204636	0.702128	2.09632e-07
TCONS_00215612	TCONS_00209767	0.712365	1.36143e-07
TCONS_00215612	TCONS_00273473	0.73765	4.3514e-08
TCONS_00215612	TCONS_00316461	0.735924	4.74579e-08
TCONS_00215612	TCONS_00327823	0.752575	1.75902e-08
TCONS_00220249	TCONS_00139640	0.73358	5.3209e-08
TCONS_00221420	TCONS_00035893	0.703238	2.0005e-07
TCONS_00221420	TCONS_00204636	0.717669	1.08642e-07
TCONS_00221420	TCONS_00281721	0.723219	8.54228e-08
TCONS_00221420	TCONS_00318580	0.790071	0
TCONS_00221420	TCONS_00318722	0.701881	2.11824e-07
TCONS_00222406	TCONS_00001904	0.757138	1.19161e-08
TCONS_00223711	TCONS_00005724	0.82325	0
TCONS_00223711	TCONS_00035893	0.801295	0
TCONS_00223711	TCONS_00064285	0.704595	1.88935e-07
TCONS_00223711	TCONS_00139640	0.718779	1.03587e-07
TCONS_00223711	TCONS_00159744	0.811656	0
TCONS_00223711	TCONS_00160840	0.845575	0
TCONS_00223711	TCONS_00160842	0.813999	0
TCONS_00223711	TCONS_00176205	0.826457	0
TCONS_00223711	TCONS_00183611	0.714832	1.22621e-07
TCONS_00223711	TCONS_00204636	0.846809	0
TCONS_00223711	TCONS_00209767	0.8177	0
TCONS_00223711	TCONS_00221558	0.721122	9.36116e-08
TCONS_00223711	TCONS_00228074	0.751218	1.94488e-08
TCONS_00223711	TCONS_00252270	0.805119	0
TCONS_00223711	TCONS_00270593	0.821523	0
TCONS_00223711	TCONS_00270595	0.792291	0
TCONS_00223711	TCONS_00273473	0.725193	7.82928e-08
TCONS_00223711	TCONS_00281719	0.713969	1.27201e-07
TCONS_00223711	TCONS_00281721	0.801418	0
TCONS_00223711	TCONS_00285694	0.767869	1.52957e-09
TCONS_00223711	TCONS_00316461	0.783657	0
TCONS_00223711	TCONS_00318580	0.751711	1.87633e-08
TCONS_00223711	TCONS_00318722	0.769843	0
TCONS_00223711	TCONS_00327823	0.81807	0
TCONS_00223711	TCONS_00327826	0.798582	0
TCONS_00223711	TCONS_00341241	0.764169	4.69539e-09
TCONS_00223712	TCONS_00005724	0.714092	1.26536e-07
TCONS_00223712	TCONS_00035893	0.733827	5.25808e-08
TCONS_00223712	TCONS_00160842	0.718902	1.03039e-07
TCONS_00223712	TCONS_00183611	0.717422	1.09796e-07
TCONS_00223712	TCONS_00209767	0.715942	1.16961e-07
TCONS_00223712	TCONS_00221558	0.704841	1.86982e-07
TCONS_00223712	TCONS_00252270	0.712982	1.32634e-07
TCONS_00223712	TCONS_00270595	0.754055	1.56554e-08
TCONS_00223712	TCONS_00281719	0.732593	5.57778e-08
TCONS_00223712	TCONS_00318580	0.726426	7.40993e-08
TCONS_00223712	TCONS_00327826	0.795251	0
TCONS_00227031	TCONS_00005724	0.813876	0
TCONS_00227031	TCONS_00010811	0.741474	3.55785e-08
TCONS_00227031	TCONS_00035893	0.829911	0
TCONS_00227031	TCONS_00048092	0.739994	3.85269e-08
TCONS_00227031	TCONS_00057292	0.703978	1.93908e-07
TCONS_00227031	TCONS_00064285	0.855936	0
TCONS_00227031	TCONS_00064287	0.716189	1.15738e-07
TCONS_00227031	TCONS_00091138	0.738514	4.16294e-08
TCONS_00227031	TCONS_00125343	0.748504	2.34263e-08
TCONS_00227031	TCONS_00139640	0.749738	2.15739e-08
TCONS_00227031	TCONS_00139646	0.709405	1.54274e-07
TCONS_00227031	TCONS_00159744	0.81659	0
TCONS_00227031	TCONS_00160840	0.784767	0
TCONS_00227031	TCONS_00160842	0.756768	1.23449e-08
TCONS_00227031	TCONS_00176205	0.81659	0
TCONS_00227031	TCONS_00176374	0.800678	0
TCONS_00227031	TCONS_00204636	0.878261	0
TCONS_00227031	TCONS_00209767	0.792661	0
TCONS_00227031	TCONS_00220768	0.73913	4.03174e-08
TCONS_00227031	TCONS_00228074	0.716065	1.16348e-07
TCONS_00227031	TCONS_00248881	0.791921	0
TCONS_00227031	TCONS_00252270	0.832007	0
TCONS_00227031	TCONS_00270593	0.737527	4.37879e-08
TCONS_00227031	TCONS_00270595	0.764539	4.36051e-09
TCONS_00227031	TCONS_00278130	0.708418	1.60828e-07
TCONS_00227031	TCONS_00281721	0.825717	0
TCONS_00227031	TCONS_00285694	0.797225	0
TCONS_00227031	TCONS_00316461	0.745174	2.88255e-08
TCONS_00227031	TCONS_00318580	0.858156	0
TCONS_00227031	TCONS_00318722	0.852852	0
TCONS_00227031	TCONS_00318733	0.739007	4.05776e-08
TCONS_00227031	TCONS_00327818	0.73099	6.01516e-08
TCONS_00227031	TCONS_00327823	0.754548	1.50312e-08
TCONS_00227031	TCONS_00327826	0.778477	0
TCONS_00227031	TCONS_00341241	0.777983	0
TCONS_00227032	TCONS_00005724	0.814369	0
TCONS_00227032	TCONS_00005727	0.709652	1.52677e-07
TCONS_00227032	TCONS_00035893	0.790441	0
TCONS_00227032	TCONS_00057292	0.711625	1.40471e-07
TCONS_00227032	TCONS_00064285	0.778723	0
TCONS_00227032	TCONS_00139640	0.789084	0
TCONS_00227032	TCONS_00159744	0.806599	0
TCONS_00227032	TCONS_00160840	0.786987	0
TCONS_00227032	TCONS_00160842	0.743941	3.09832e-08
TCONS_00227032	TCONS_00176205	0.801542	0
TCONS_00227032	TCONS_00176374	0.760715	8.03093e-09
TCONS_00227032	TCONS_00183611	0.729016	6.58966e-08
TCONS_00227032	TCONS_00204636	0.816096	0
TCONS_00227032	TCONS_00209767	0.783904	0
TCONS_00227032	TCONS_00221558	0.731607	5.84393e-08
TCONS_00227032	TCONS_00252270	0.81659	0
TCONS_00227032	TCONS_00270593	0.740857	3.67888e-08
TCONS_00227032	TCONS_00270595	0.78008	0
TCONS_00227032	TCONS_00273473	0.73247	5.61054e-08
TCONS_00227032	TCONS_00281721	0.795621	0
TCONS_00227032	TCONS_00285694	0.767006	2.23272e-09
TCONS_00227032	TCONS_00316461	0.796855	0
TCONS_00227032	TCONS_00318580	0.793401	0
TCONS_00227032	TCONS_00318722	0.772433	0
TCONS_00227032	TCONS_00327818	0.726426	7.40993e-08
TCONS_00227032	TCONS_00327823	0.814369	0
TCONS_00227032	TCONS_00327826	0.762319	6.43409e-09
TCONS_00227032	TCONS_00341241	0.797471	0
TCONS_00227034	TCONS_00005724	0.8251	0
TCONS_00227034	TCONS_00035893	0.781807	0
TCONS_00227034	TCONS_00057292	0.714955	1.21979e-07
TCONS_00227034	TCONS_00064285	0.731977	5.74301e-08
TCONS_00227034	TCONS_00139640	0.733827	5.25808e-08
TCONS_00227034	TCONS_00159744	0.839408	0
TCONS_00227034	TCONS_00160840	0.82806	0
TCONS_00227034	TCONS_00160842	0.767993	1.43083e-09
TCONS_00227034	TCONS_00176205	0.827937	0
TCONS_00227034	TCONS_00176374	0.725933	7.57534e-08
TCONS_00227034	TCONS_00183611	0.726179	7.49225e-08
TCONS_00227034	TCONS_00204636	0.814616	0
TCONS_00227034	TCONS_00209767	0.819673	0
TCONS_00227034	TCONS_00221558	0.735307	4.89254e-08
TCONS_00227034	TCONS_00252270	0.812026	0
TCONS_00227034	TCONS_00270593	0.730373	6.19026e-08
TCONS_00227034	TCONS_00270595	0.795375	0
TCONS_00227034	TCONS_00273473	0.734937	4.98214e-08
TCONS_00227034	TCONS_00281721	0.766142	2.9571e-09
TCONS_00227034	TCONS_00285694	0.775146	0
TCONS_00227034	TCONS_00316461	0.822263	0
TCONS_00227034	TCONS_00318580	0.767253	2.02967e-09
TCONS_00227034	TCONS_00318722	0.792044	0
TCONS_00227034	TCONS_00327818	0.758372	1.05239e-08
TCONS_00227034	TCONS_00327823	0.814986	0
TCONS_00227034	TCONS_00327826	0.768363	1.13711e-09
TCONS_00227034	TCONS_00341241	0.828554	0
TCONS_00227098	TCONS_00064285	0.723959	8.26862e-08
TCONS_00227103	TCONS_00048117	0.715942	1.16961e-07
TCONS_00227103	TCONS_00176205	0.7284	6.77788e-08
TCONS_00227103	TCONS_00176374	0.711995	1.38291e-07
TCONS_00227103	TCONS_00204636	0.739994	3.85269e-08
TCONS_00227103	TCONS_00252270	0.719642	9.98053e-08
TCONS_00227103	TCONS_00341241	0.705828	1.79371e-07
TCONS_00227117	TCONS_00048092	0.73802	4.26994e-08
TCONS_00227117	TCONS_00139640	0.767253	2.02967e-09
TCONS_00227117	TCONS_00204636	0.717422	1.09796e-07
TCONS_00237242	TCONS_00053050	0.720012	9.82232e-08
TCONS_00237242	TCONS_00057291	0.710762	1.4569e-07
TCONS_00237242	TCONS_00060421	0.701264	2.17406e-07
TCONS_00237242	TCONS_00069584	0.715819	1.17578e-07
TCONS_00237242	TCONS_00160840	0.728276	6.81604e-08
TCONS_00237242	TCONS_00176205	0.73099	6.01516e-08
TCONS_00237242	TCONS_00176374	0.735677	4.80411e-08
TCONS_00237242	TCONS_00183614	0.710515	1.47215e-07
TCONS_00237242	TCONS_00273473	0.739254	4.00584e-08
TCONS_00237242	TCONS_00278135	0.704595	1.88935e-07
TCONS_00237242	TCONS_00316461	0.743324	3.20962e-08
TCONS_00237242	TCONS_00327823	0.714215	1.25876e-07
TCONS_00237850	TCONS_00048092	0.829787	0
TCONS_00237988	TCONS_00057292	0.736417	4.63066e-08
TCONS_00237988	TCONS_00060421	0.745051	2.90373e-08
TCONS_00237988	TCONS_00159744	0.72803	6.89289e-08
TCONS_00237988	TCONS_00160840	0.749245	2.23058e-08
TCONS_00237988	TCONS_00160842	0.776873	0
TCONS_00237988	TCONS_00176205	0.758002	1.09356e-08
TCONS_00237988	TCONS_00176374	0.715942	1.16961e-07
TCONS_00237988	TCONS_00183611	0.800925	0
TCONS_00237988	TCONS_00183614	0.800062	0
TCONS_00237988	TCONS_00209767	0.729016	6.58966e-08
TCONS_00237988	TCONS_00224128	0.712118	1.37571e-07
TCONS_00237988	TCONS_00252270	0.706075	1.77517e-07
TCONS_00237988	TCONS_00270595	0.725686	7.6592e-08
TCONS_00237988	TCONS_00273473	0.788591	0
TCONS_00237988	TCONS_00316461	0.796485	0
TCONS_00237988	TCONS_00327823	0.781684	0
TCONS_00251086	TCONS_00001897	0.725933	7.57534e-08
TCONS_00251086	TCONS_00005724	0.759729	9.05697e-09
TCONS_00251086	TCONS_00035893	0.777983	0
TCONS_00251086	TCONS_00048092	0.856676	0
TCONS_00251086	TCONS_00064285	0.81881	0
TCONS_00251086	TCONS_00091138	0.72766	7.00948e-08
TCONS_00251086	TCONS_00139640	0.77305	0
TCONS_00251086	TCONS_00139645	0.711872	1.39014e-07
TCONS_00251086	TCONS_00159744	0.746408	2.67554e-08
TCONS_00251086	TCONS_00160840	0.701881	2.11824e-07
TCONS_00251086	TCONS_00160842	0.746284	2.69586e-08
TCONS_00251086	TCONS_00176205	0.787727	0
TCONS_00251086	TCONS_00176374	0.739377	3.98004e-08
TCONS_00251086	TCONS_00204636	0.882208	0
TCONS_00251086	TCONS_00209767	0.743694	3.14257e-08
TCONS_00251086	TCONS_00252270	0.790194	0
TCONS_00251086	TCONS_00270595	0.715942	1.16961e-07
TCONS_00251086	TCONS_00281721	0.8605	0
TCONS_00251086	TCONS_00285694	0.73543	4.86293e-08
TCONS_00251086	TCONS_00318580	0.812889	0
TCONS_00251086	TCONS_00318722	0.77342	0
TCONS_00251086	TCONS_00318733	0.707061	1.7029e-07
TCONS_00251086	TCONS_00327818	0.701758	2.12929e-07
TCONS_00251086	TCONS_00327823	0.745421	2.84046e-08
TCONS_00251086	TCONS_00327826	0.707431	1.67656e-07
TCONS_00251086	TCONS_00341241	0.781314	0
TCONS_00251088	TCONS_00048092	0.707925	1.64207e-07
TCONS_00251088	TCONS_00064285	0.700771	2.21978e-07
TCONS_00251088	TCONS_00139640	0.771816	0
TCONS_00251088	TCONS_00204636	0.707431	1.67656e-07
TCONS_00251372	TCONS_00005724	0.757879	1.1074e-08
TCONS_00251372	TCONS_00005727	0.726673	7.32836e-08
TCONS_00251372	TCONS_00010808	0.72951	6.44212e-08
TCONS_00251372	TCONS_00010811	0.792661	0
TCONS_00251372	TCONS_00035893	0.782794	0
TCONS_00251372	TCONS_00057292	0.801172	0
TCONS_00251372	TCONS_00060421	0.748134	2.3997e-08
TCONS_00251372	TCONS_00091138	0.777367	0
TCONS_00251372	TCONS_00125343	0.720506	9.6149e-08
TCONS_00251372	TCONS_00159744	0.871107	0
TCONS_00251372	TCONS_00160840	0.839531	0
TCONS_00251372	TCONS_00160842	0.77342	0
TCONS_00251372	TCONS_00167573	0.756522	1.26338e-08
TCONS_00251372	TCONS_00176205	0.844342	0
TCONS_00251372	TCONS_00176374	0.709158	1.55888e-07
TCONS_00251372	TCONS_00181040	0.722109	8.96756e-08
TCONS_00251372	TCONS_00183611	0.721986	9.01595e-08
TCONS_00251372	TCONS_00204636	0.788221	0
TCONS_00251372	TCONS_00209767	0.853839	0
TCONS_00251372	TCONS_00228074	0.710392	1.47983e-07
TCONS_00251372	TCONS_00252270	0.86716	0
TCONS_00251372	TCONS_00270593	0.755042	1.44171e-08
TCONS_00251372	TCONS_00270595	0.795128	0
TCONS_00251372	TCONS_00273473	0.769473	2.78384e-10
TCONS_00251372	TCONS_00278130	0.747024	2.5752e-08
TCONS_00251372	TCONS_00281721	0.810052	0
TCONS_00251372	TCONS_00285694	0.8679	0
TCONS_00251372	TCONS_00316461	0.846932	0
TCONS_00251372	TCONS_00318580	0.77416	0
TCONS_00251372	TCONS_00318722	0.809806	0
TCONS_00251372	TCONS_00327818	0.732963	5.48039e-08
TCONS_00251372	TCONS_00327823	0.808079	0
TCONS_00251372	TCONS_00341241	0.772063	0
TCONS_00251375	TCONS_00139645	0.727043	7.2074e-08
TCONS_00251375	TCONS_00318733	0.716929	1.12138e-07
TCONS_00261785	TCONS_00005724	0.789578	0
TCONS_00261785	TCONS_00005727	0.719272	1.0141e-07
TCONS_00261785	TCONS_00035893	0.787357	0
TCONS_00261785	TCONS_00048092	0.807956	0
TCONS_00261785	TCONS_00057292	0.727413	7.08811e-08
TCONS_00261785	TCONS_00064285	0.795005	0
TCONS_00261785	TCONS_00091138	0.704348	1.90909e-07
TCONS_00261785	TCONS_00139640	0.815973	0
TCONS_00261785	TCONS_00139645	0.742707	3.32327e-08
TCONS_00261785	TCONS_00141342	-0.701141	2.1854e-07
TCONS_00261785	TCONS_00159744	0.746408	2.67554e-08
TCONS_00261785	TCONS_00160840	0.763676	5.14848e-09
TCONS_00261785	TCONS_00160842	0.710022	1.50312e-07
TCONS_00261785	TCONS_00176205	0.788837	0
TCONS_00261785	TCONS_00176374	0.768486	1.04005e-09
TCONS_00261785	TCONS_00204636	0.880234	0
TCONS_00261785	TCONS_00209767	0.747024	2.5752e-08
TCONS_00261785	TCONS_00252270	0.812273	0
TCONS_00261785	TCONS_00270593	0.756892	1.22014e-08
TCONS_00261785	TCONS_00270595	0.701511	2.15155e-07
TCONS_00261785	TCONS_00281721	0.858649	0
TCONS_00261785	TCONS_00285694	0.741104	3.63016e-08
TCONS_00261785	TCONS_00318580	0.857786	0
TCONS_00261785	TCONS_00318722	0.806475	0
TCONS_00261785	TCONS_00318733	0.756275	1.2925e-08
TCONS_00261785	TCONS_00327818	0.713969	1.27201e-07
TCONS_00261785	TCONS_00327823	0.765896	3.16804e-09
TCONS_00261785	TCONS_00327826	0.709898	1.51097e-07
TCONS_00261785	TCONS_00341241	0.762072	6.67421e-09
TCONS_00262922	TCONS_00318580	0.705088	1.8505e-07
TCONS_00263934	TCONS_00010811	0.709282	1.55079e-07
TCONS_00267145	TCONS_00005724	0.703484	1.97981e-07
TCONS_00267145	TCONS_00035893	0.771323	0
TCONS_00267145	TCONS_00125343	0.713722	1.28539e-07
TCONS_00267145	TCONS_00139645	0.710515	1.47215e-07
TCONS_00267145	TCONS_00159744	0.751341	1.92764e-08
TCONS_00267145	TCONS_00204636	0.756522	1.26338e-08
TCONS_00267145	TCONS_00209767	0.704965	1.86014e-07
TCONS_00267145	TCONS_00252270	0.792168	0
TCONS_00267145	TCONS_00270595	0.712858	1.33329e-07
TCONS_00267145	TCONS_00281721	0.765032	3.9205e-09
TCONS_00267145	TCONS_00285694	0.753562	1.62898e-08
TCONS_00267145	TCONS_00318580	0.840025	0
TCONS_00267145	TCONS_00318722	0.780327	0
TCONS_00267145	TCONS_00318733	0.766019	3.06235e-09
TCONS_00267890	TCONS_00005724	0.733087	5.44821e-08
TCONS_00267890	TCONS_00010811	0.701264	2.17406e-07
TCONS_00267890	TCONS_00159744	0.725069	7.8723e-08
TCONS_00267890	TCONS_00176205	0.763552	5.26294e-09
TCONS_00267890	TCONS_00209767	0.72729	7.12769e-08
TCONS_00267890	TCONS_00248881	0.705951	1.78441e-07
TCONS_00267890	TCONS_00316461	0.701141	2.1854e-07
TCONS_00269305	TCONS_00176374	0.700894	2.20826e-07
TCONS_00270524	TCONS_00064285	0.716065	1.16348e-07
TCONS_00270524	TCONS_00204636	0.711872	1.39014e-07
TCONS_00281578	TCONS_00139640	0.722233	8.91941e-08
TCONS_00283353	TCONS_00060421	0.703978	1.93908e-07
TCONS_00283353	TCONS_00316461	0.711255	1.42685e-07
TCONS_00284561	TCONS_00053052	0.838791	0
TCONS_00284561	TCONS_00176333	0.72914	6.55252e-08
TCONS_00285589	TCONS_00064287	0.746531	2.6553e-08
TCONS_00285589	TCONS_00114944	0.73506	4.95214e-08
TCONS_00285589	TCONS_00125343	0.779587	0
TCONS_00285589	TCONS_00181040	0.742954	3.27753e-08
TCONS_00285589	TCONS_00209767	0.721246	9.31113e-08
TCONS_00285589	TCONS_00220768	0.726056	7.5337e-08
TCONS_00285589	TCONS_00228074	0.743571	3.16482e-08
TCONS_00285589	TCONS_00252270	0.738514	4.16294e-08
TCONS_00285589	TCONS_00278130	0.734443	5.10344e-08
TCONS_00285589	TCONS_00285694	0.762442	6.31478e-09
TCONS_00285589	TCONS_00318580	0.763059	5.72557e-09
TCONS_00285589	TCONS_00318722	0.710638	1.4645e-07
TCONS_00287608	TCONS_00035893	0.733333	5.38427e-08
TCONS_00287608	TCONS_00091138	0.702004	2.10725e-07
TCONS_00287608	TCONS_00160842	0.712365	1.36143e-07
TCONS_00287608	TCONS_00176205	0.703238	2.0005e-07
TCONS_00287608	TCONS_00252270	0.713599	1.29213e-07
TCONS_00287609	TCONS_00035893	0.737527	4.37879e-08
TCONS_00287609	TCONS_00176205	0.702498	2.06388e-07
TCONS_00293667	TCONS_00139640	0.839901	0
TCONS_00293667	TCONS_00204636	0.73099	6.01516e-08
TCONS_00293667	TCONS_00281721	0.754548	1.50312e-08
TCONS_00293667	TCONS_00318580	0.714092	1.26536e-07
TCONS_00299533	TCONS_00159744	0.704348	1.90909e-07
TCONS_00299533	TCONS_00204636	0.719396	1.00873e-07
TCONS_00299533	TCONS_00248881	0.753191	1.67725e-08
TCONS_00299533	TCONS_00318722	0.709652	1.52677e-07
TCONS_00307159	TCONS_00005724	0.785261	0
TCONS_00307159	TCONS_00035893	0.736047	4.71682e-08
TCONS_00307159	TCONS_00064285	0.763182	5.60919e-09
TCONS_00307159	TCONS_00159744	0.793031	0
TCONS_00307159	TCONS_00160840	0.82547	0
TCONS_00307159	TCONS_00160842	0.793401	0
TCONS_00307159	TCONS_00176205	0.82436	0
TCONS_00307159	TCONS_00176374	0.795375	0
TCONS_00307159	TCONS_00183611	0.715819	1.17578e-07
TCONS_00307159	TCONS_00204636	0.847302	0
TCONS_00307159	TCONS_00209767	0.776503	0
TCONS_00307159	TCONS_00224140	0.723959	8.26862e-08
TCONS_00307159	TCONS_00252270	0.769596	1.85014e-10
TCONS_00307159	TCONS_00270593	0.77231	0
TCONS_00307159	TCONS_00270595	0.752451	1.77557e-08
TCONS_00307159	TCONS_00273473	0.765156	3.81164e-09
TCONS_00307159	TCONS_00281721	0.747024	2.5752e-08
TCONS_00307159	TCONS_00285694	0.743324	3.20962e-08
TCONS_00307159	TCONS_00316461	0.788344	0
TCONS_00307159	TCONS_00318580	0.710515	1.47215e-07
TCONS_00307159	TCONS_00318722	0.743694	3.14257e-08
TCONS_00307159	TCONS_00327823	0.818563	0
TCONS_00307159	TCONS_00327826	0.730126	6.26141e-08
TCONS_00307159	TCONS_00341241	0.788467	0
TCONS_00309840	TCONS_00010811	0.81955	0
TCONS_00309840	TCONS_00091138	0.777737	0
TCONS_00316787	TCONS_00005724	0.726796	7.28785e-08
TCONS_00316787	TCONS_00035893	0.771323	0
TCONS_00316787	TCONS_00057292	0.773296	0
TCONS_00316787	TCONS_00060421	0.73506	4.95214e-08
TCONS_00316787	TCONS_00159744	0.807339	0
TCONS_00316787	TCONS_00160840	0.821277	0
TCONS_00316787	TCONS_00160842	0.830157	0
TCONS_00316787	TCONS_00167573	0.743571	3.16482e-08
TCONS_00316787	TCONS_00176205	0.836818	0
TCONS_00316787	TCONS_00176374	0.700524	2.24301e-07
TCONS_00316787	TCONS_00183611	0.742461	3.3694e-08
TCONS_00316787	TCONS_00204636	0.756522	1.26338e-08
TCONS_00316787	TCONS_00209767	0.840395	0
TCONS_00316787	TCONS_00221558	0.755288	1.41138e-08
TCONS_00316787	TCONS_00228074	0.78304	0
TCONS_00316787	TCONS_00252270	0.857046	0
TCONS_00316787	TCONS_00270593	0.789454	0
TCONS_00316787	TCONS_00270595	0.820907	0
TCONS_00316787	TCONS_00273473	0.835091	0
TCONS_00316787	TCONS_00278130	0.702744	2.04253e-07
TCONS_00316787	TCONS_00281719	0.740734	3.7034e-08
TCONS_00316787	TCONS_00281721	0.803392	0
TCONS_00316787	TCONS_00285694	0.820167	0
TCONS_00316787	TCONS_00316461	0.852852	0
TCONS_00316787	TCONS_00318580	0.718039	1.06933e-07
TCONS_00316787	TCONS_00318722	0.718902	1.03039e-07
TCONS_00316787	TCONS_00327823	0.861363	0
TCONS_00316789	TCONS_00010808	0.746901	2.5951e-08
TCONS_00317835	TCONS_00183603	0.701141	2.1854e-07
TCONS_00317835	TCONS_00221544	-0.748258	2.3806e-08
TCONS_00317836	TCONS_00035893	0.705705	1.80305e-07
TCONS_00317836	TCONS_00159744	0.709405	1.54274e-07
TCONS_00317836	TCONS_00160840	0.711872	1.39014e-07
TCONS_00317836	TCONS_00160842	0.703361	1.99013e-07
TCONS_00317836	TCONS_00176205	0.753685	1.61303e-08
TCONS_00317836	TCONS_00176374	0.717299	1.10377e-07
TCONS_00317836	TCONS_00204636	0.799445	0
TCONS_00317836	TCONS_00281721	0.73062	6.11975e-08
TCONS_00317836	TCONS_00327826	0.713105	1.31943e-07
TCONS_00317836	TCONS_00341241	0.756522	1.26338e-08
TCONS_00325476	TCONS_00084218	-0.703484	1.97981e-07
TCONS_00325477	TCONS_00001904	0.788714	0
TCONS_00325477	TCONS_00064285	0.736787	4.54562e-08
TCONS_00325477	TCONS_00084218	-0.706198	1.76597e-07
TCONS_00325477	TCONS_00176374	0.711872	1.39014e-07
TCONS_00325477	TCONS_00204636	0.747764	2.45748e-08
TCONS_00332786	TCONS_00064287	0.700401	2.25472e-07
TCONS_00334788	TCONS_00125343	0.724699	8.00256e-08
TCONS_00335059	TCONS_00053042	0.728276	6.81604e-08
TCONS_00335059	TCONS_00084218	-0.713475	1.2989e-07
TCONS_00335163	TCONS_00139640	0.721862	9.06456e-08
TCONS_00335366	TCONS_00048117	0.706321	1.75682e-07
TCONS_00335366	TCONS_00060413	-0.749985	2.12125e-08
TCONS_00335366	TCONS_00183611	0.737157	4.46166e-08
TCONS_00335366	TCONS_00183614	0.749491	2.19384e-08
TCONS_00335366	TCONS_00220772	0.700524	2.24301e-07
TCONS_00335366	TCONS_00327823	0.740241	3.80251e-08
TCONS_00335997	TCONS_00048092	0.706691	1.72965e-07
TCONS_00335997	TCONS_00064285	0.702128	2.09632e-07
TCONS_00335997	TCONS_00139640	0.787604	0
TCONS_00335997	TCONS_00204636	0.770829	0
TCONS_00335997	TCONS_00281721	0.73025	6.22576e-08
